# Supplementary material for: Absence of nitrogen threshold effect on soil respiration leads to an underestimation of global soil carbon sequestration in model
Source: Copernicus journal article supplement (doi:10.5194/egusphere-2026-296), 2026-02-03
Supplement: Supplementary file 1 [file Dataset S1.xlsx]

## Sheet: Terminology & abbreviations
Types	Terminology	abbreviations
Ecosystems	Grassland	GLD
	Boreal forests	B
	Temperate forests	TE
	Subtropical forests	SubTR
	Tropical forests	TR
	Coniferous forests	CF
	Deciduous broad-leaved forests	DF
	Evergreen forests	EF
Variables	the duration of the N addition experiment.	Duration
	Mean annual temperature	MAT
	Mean annual precipitation	MAP
	Soil respiration	Rs
	Heterotrophic respiration	Rh
	Autotrophic respiration	Ra
	Soil temperature	ST
	Soil water content	SW
	Fine root biomas	FRB
	Soil organic carbon	SOC
	Soil total nitrogen	STN
	Soil microbial biomass carbon	MBC
	Soil microbial biomass nitrogen	MBN
	Aboveground biomass	AGB
	Belowground biomass	BGB

## Sheet: Rawdata
Refernce	Site	EcosysTEs	N deposition	Available N	N addition concentration (g N m-2 yr-1)	N form	pH	Duration (year)	MAT	MAP	Sample size	Rs (±SD)	Rh(±SD)	Ra(±SD)	ST(±SD)	SW(±SD)	FRB(±SD)	SOC(±SD)	STN(±SD)	MBC(±SD)	MBN(±SD)	AGB(±SD)	BGB(±SD)	litter input	Sand(%)	Silt(%)	Clay(%)	ANPP	BNPP	NEP
[001]	103.5E,32.8N	TE-DF	1.125		0	NH4NO3		0.5	4.8	693.2	5	2.89±0.29	1.97±0.19	0.92±0.11
[001]	103.5E,32.8N	TE-DF			2	NH4NO3		0.5	4.8	693.2	5	2.84±0.24	2.24±0.24	0.61±0.08
[001]	103.5E,32.8N	TE-DF			5	NH4NO3		0.5	4.8	693.2	5	2.97±0.25	2.15±0.17	0.82±0.14
[001]	103.5E,32.8N	TE-DF			10	NH4NO3		0.5	4.8	693.2	5	2.86±0.21	2.17±0.18	0.69±0.09
[002]	112.86E,29.53N	subTR-DF	2.6		0	NH4NO3		1	16.75	1300	3	3.21±0.3	2.12±0.2	1.09±0.1
[002]	112.86E,29.53N	subTR-DF			5	NH4NO3		1	16.75	1300	3	2.82±0.2	2.05±0.15	0.77±0.56
[002]	112.86E,29.53N	subTR-DF			10	NH4NO3		1	16.75	1300	3	2.82±0.2	1.96±0.14	0.86±0.18
[002]	112.86E,29.53N	subTR-DF			20	NH4NO3		1	16.75	1300	3	2.72±0.2	1.99±0.15	0.75±0.06
[003]	102.9E,31.8N	TE-CF	0.755		0	NH4NO3	6.03±0.2	0.3	9	900	3	2.75±0.22	1.9±0.6	0.85±0.4	8.76±0.78	41.2±2.93			2.94(g kg-1)	111.8±12.97(mg kg-1)	50.4±10.22
[003]	102.9E,31.8N	TE-CF			2	NH4NO3	5.9±0.23	0.3	9	900	3	2.96±0.24	1.96±0.6	1±0.3	8.6±0.77	38.4±2.73				146±16.94	91.4±18.53
[003]	102.9E,31.8N	TE-CF			5	NH4NO3	5.83±0.3	0.3	9	900	3	4.2±0.34	2.7±1.1	1.5±0.6	9±0.80	39±2.78				149±17.29	78±15.81
[003]	102.9E,31.8N	TE-CF			10	NH4NO3	5.78±0.28	0.3	9	900	3	3.5±0.28	2.5±0.9	1±0.5	9.42±0.84	40.2±2.86				152±17.64	69±13.98
[004]	117.61E,26.33N	subTR-CF	3.63		0	NH4NO3	4.7±0.1	1	19.1	1750	5	498±12.5			20.1±0.1	22.7±0.7	9.6±3.2(g m-2)	14.2±0.4(g kg-1)	1.4±0.19 (g kg-1)	163±14(mg kg-1)
[004]	117.61E,26.33N	subTR-CF			4	NH4NO3	4.6±0.1	1	19.1	1750	5	473±35			20.5±0.2	21.8±0.6	12.7±3.2	13.2±0.75	1.3±0.1	243±17
[004]	117.61E,26.33N	subTR-CF			8	NH4NO3	4.6±0.1	1	19.1	1750	5	505±35			20.1±0.2	21.2±0.3	7.5±1.7	13.5±1.1	1.4±0.2	173±23
[005]	127.56E,45.3N	TE-CF			0		4.47±0.18	5	2.7	700	3		14±1					61.2±8.1(g kg-1)	5.02±1.1 (g kg-1)
[005]	127.56E,45.3N	TE-CF			10	NH4NO3	4.61±0.21	5	2.7	700	3		9.6±0.7					67.3±7.6	5.56±1.02
[005]	127.56E,45.3N	TE-CF			10	mixed N	4.48±0.06	5	2.7	700	3		8.9±0.1					61.6±9.1	5.48±0.76
[006]	128E,42.4N	TE-CF	2.3		0	NH4NO3	4.73±0.04	7	3.6	740	3	2.45±0.23	1.8±0.14	0.65±0.08			91.5±6(g m-2)		5.53±0.4(g kg-1)	0.613±0.04(mg g-1)		0.61284	0.03657
[006]	128E,42.4N	TE-CF			5	NH4NO3	4.52±0.12	7	3.6	740	3	3.35±0.08	2.05±0.2	1.3±0.05			114.6±4.2		5.96±0.36	0.79±0.06		0.64941
[006]	128E,42.4N	TE-CF			0	NH4NO3	5.14±0.03	8	3.6	740	3	3.1±0.13	2.17±0.17	1.5±0.15			123±4		6.12±0.39	1.58±0.08		0.79439	0.05863
[006]	128E,42.4N	TE-CF			5	NH4NO3	4.93±0.09	8	3.6	740	3	2.7±0.14	1.9±0.1	0.8±0.05			102±6		5.93±0.26	2.32±0.08		0.85302
[007]	148.3W,64.75N	B-CF			0	NH4NO3		5	-3.7	269	3						41±1	4569±784(g m-2)	193±41 g m-2 (0-20cm)	26.5±5.5	26±3
[007]	148.3W,64.75N	B-CF			10	NH4NO3		5	-3.7	269	3						39±1.5	3997±784	174±18	25±1	29.5±1.5
[007]	148.3W,64.75N	B-DF			0	NH4NO3		5	-3.7	269	3						41±2	5174±367	298±25	52.5±8	52±4
[007]	148.3W,64.75N	B-DF			10	NH4NO3		5	-3.7	269	3						41±1.8	5220±330	289±23	44.8±2	54.8±4.5
[008]	152.6E,26.45S	TE-CF			0	NH4NO3	6.53±0.1	5			4	0.53±0.048						45.4±3.6(%)	2.93±0.18 (g kg-1,10cm)	924.5±71.4(ug g-1)	155.7±27.6				63±4.1	28.8±3.3	8.2±2.1
[008]	152.6E,26.45S	TE-CF			30	NH4NO3	5.98±0.2	5			4	0.425±0.048						45.5±5.8	2.77±0.34	718.4±148.6	97.5±20.4
[008]	152.6E,26.45S	TE-CF			60	NH4NO3	6.14±0.24	5			4	0.45±0.065						49.4±3.6	3.01± 0.28	724.9±153.3	118.1±21.4
[009]	Bavaria, Germany	TE-CF			0	NH4NO3	3.61±0.01	0.5			9		37.5±2.1						2.1(%)	3.97±0.12(mg g-1)
[009]	Bodenmais	TE-CF			2	NH4NO3		0.5			9		40.9±3.6							4.03±0.21
[009]	Bodenmais	TE-CF			10	NH4NO3		0.5			9		42.7±3.8							4.2±0.13
[009]	Bodenmais	TE-CF			20	NH4NO3		0.5			9		35.8±2.9							4.49±0.09
[009]	Bavaria, Germany	TE-CF			0	NH4NO3	3.73±0.1	0.5			9		67.6±2.7						1.4±0.1	3.61±0.15
[009]	Waldstein	TE-CF			2	NH4NO3		0.5			9		63.3±2.2							3.31±0.13
[009]	Waldstein	TE-CF			10	NH4NO3		0.5			9		62±4.1							3.11±0.15
[009]	Waldstein	TE-CF			20	NH4NO3		0.5			9		64.9±1.4							3.23±0.05
[009]	Bavaria, Germany	TE-CF			0	NH4NO3	3.6±0.13	0.5			9		75.9±2.2						1.8	3.48±0.1
[009]	Goldkronach	TE-CF			2	NH4NO3		0.5			9		79.1±2.2							3.37±0.1
[009]	Goldkronach	TE-CF			10	NH4NO3		0.5			9		81.1±1.7							3.37±0.17
[009]	Goldkronach	TE-CF			20	NH4NO3		0.5			9		76±2.1							3.41±0.06
[009]	Bavaria, Germany	TE-CF			0	NH4NO3	3.47±0.01	0.5			9		19.7±1.5						1.6	1.12±0.11
[009]	Kelheim	TE-CF			2	NH4NO3		0.5			9		18.1±2.2							1.34±0.14
[009]	Kelheim	TE-CF			10	NH4NO3		0.5			9		22.2±2.8							1.45±0.28
[009]	Kelheim	TE-CF			20	NH4NO3		0.5			9		20.5±1.4							1.33±0.09
[010]	129E,48.1N	TE-CF			0	NH4NO3	4.82±0.02	4	-0.5	720	3	1.05±0.06			0.89±0.09	81±6.3		31.94±1.36	7.11±0.12 (g kg-1)	1.31±0.08	0.13±0.01
[010]	129E,48.1N	TE-CF			5	NH4NO3	4.51±0.02	4	-0.5	720	3	0.95±0.12			0.68±0.03	100±0.4		28.18±1.06	8.18±0.09	1.24±0.05	0.16±0.01
[010]	129E,48.1N	TE-CF			0	NH4NO3	4.8±0.02	4	-0.5	720	3	0.45±0.03				7±0.8		33.74±0.88	7.36±0.07	0.84±0.04	0.11±0.01
[010]	129E,48.1N	TE-CF			5	NH4NO3	4.5±0.01	4	-0.5	720	3	0.32±0.01				7±0.6		31.11±0.54	8.3±0.06	0.85±0.03	0.09±0.01
[011]	116.3E,42N	GLD			0	NH4NO3	6.81±0.14	13	3.3	316	4	62.06±7.25						12.3±0.34(g kg-1)	1.3±0.03			135.97±9.65(g m-2)	334.07±29.9		62.8	20.3	16.9
[011]	116.3E,42N	GLD			12	NH4NO3	5.49±0.07	13	3.3	316	4	61.01±7.01										187.35±16.31	897.44±91.89
[011]	116.3E,42N	GLD			24	NH4NO3	4.64±0.02	13	3.3	316	4	43.77±4.67										220.67±26.72	1138.15±386.41
[012]	92.88E,34.73N	GLD	1.78		0	NH4NO3		1	-5.3	310.7	3	1.7±0.3								200±23(mg kg-1)		500±30(g m-2)	9333±200
[012]	92.88E,34.73N	GLD			5	NH4NO3		1	-5.3	310.7	3	2.1±0.3								180±18		616±15	10500±200
[013]	87.2W,30.83N	TE-CF			0	NH4NO3	5.7±0.16	8			4	720±20					129±35(g m-2 mo-1)			160±10
[013]	87.2W,30.83N	TE-CF			5.6	NH4NO3	6.1±0.28	8			4	647±30					136±33			118±25
[013]	87.2W,30.83N	TE-CF			11.2	NH4NO3	5.9±0.18	8			4	682±21					144±21			117±20
[013]	87.2W,30.83N	TE-CF			22.4	NH4NO3	5.5±0.38	8			4	715±50					165±28			94±28
[013]	87.2W,30.83N	TE-DF			0	NH4NO3	5.7±0.12	8			4	858±18					243±33			185±8
[013]	87.2W,30.83N	TE-DF			5.6	NH4NO3	6±0.18	8			4	814±25					220±32			145±15
[013]	87.2W,30.83N	TE-DF			11.2	NH4NO3	6.5±0.15	8			4	725±17					205±22			131±9
[013]	87.2W,30.83N	TE-DF			22.4	NH4NO3	6.3±0.28	8			4	726±32					211±32			112±30
[014]	72.3W,42.5N	TE-CF	0.8		0	NH4NO3	3.2	1	3.5	1120	16	429.9±41.9
[014]	72.3W,42.5N	TE-CF			3.7	NH4NO3		1	3.5	1120	16	428.7±47.1
[014]	72.3W,42.5N	TE-CF			12	NH4NO3		1	3.5	1120	16	358.7±32
[014]	72.3W,42.5N	TE-CF			0	NH4NO3		2	3.5	1120	16	480.5±21.2
[014]	72.3W,42.5N	TE-CF			5	NH4NO3		2	3.5	1120	16	417.7±15.7
[014]	72.3W,42.5N	TE-CF			15	NH4NO3		2	3.5	1120	16	372.9±26.3
[014]	72.3W,42.5N	TE-DF			0	NH4NO3	3.3	1	3.5	1120	16	482±40.9
[014]	72.3W,42.5N	TE-DF			3.7	NH4NO3		1	3.5	1120	16	606.5±25.6
[014]	72.3W,42.5N	TE-DF			12	NH4NO3		1	3.5	1120	16	596.5±27.5
[014]	72.3W,42.5N	TE-DF			0	NH4NO3		2	3.5	1120	16	533.6±53.2
[014]	72.3W,42.5N	TE-DF			5	NH4NO3		2	3.5	1120	16	606.7±29.2
[014]	72.3W,42.5N	TE-DF			15	NH4NO3		2	3.5	1120	16	475.6±30.7
[015]	121.78E,29.8N	SubTR-DF	3.6		0	NH4NO3	4.75	2	16.2	1374	3	596.3±10	560±61.54	360.3±6			100±15(g m-2)			1.75±0.2(ug g-1)
[015]	121.78E,29.8N	SubTR-DF			10	NH4NO3		2	16.2	1374	3	854.11±20	500±54.95	354.11±10			145±14			1.7±0.02
[016]	72.43W,43.42N	TE-CF	0.54		0	NH4Cl	2.66±0.13	14			2							44.04±1.42	1.39±0.08	3286±1070(ug g-1)
[016]	72.43W,43.42N	TE-CF			1.57	NH4Cl	2.71±0.05	14			2							38.46±4.08	1.43±0.17	1537±372
[016]	72.43W,43.42N	TE-CF			3.14	NH4Cl	2.8±0.01	14			2							39.77±2.85	1.53±0.18	1560±220
[016]	72.1W,42.5N	TE-CF			0	NH4NO3	3.16±0.14	14			3							21.14±3.02	0.84±0.13	4160±110
[016]	72.1W,42.5N	TE-CF			5	NH4NO3	2.95±0.13	14			3							20.37±1.53	0.8±0.17	3350±50
[016]	72.1W,42.5N	TE-CF			15	NH4NO3	2.91±0.13	14			3							17.17±1.44	0.72±0.12	1953±50
[016]	72.1W,42.5N	TE-DF			0	NH4NO3	3.16±0.14	14			1							17.29±2.17	0.77±0.09 (%）	2980±110
[016]	72.1W,42.5N	TE-DF			5	NH4NO3	2.91±0.13	14			1							19.65±2.64	0.85±0.11	1820±155
[016]	72.1W,42.5N	TE-DF			15	NH4NO3	2.99±0.13	14			1							18.02±1.99	0.79±0.1	1560±110
[017]	72.16W,42.53N	TE-DF	0.8		0	NH4NO3		5	6.5	1100	1	116.3±7.8						5.8(%)	0.3(%)
[017]	72.16W,42.53N	TE-DF			15	NH4NO3		5	6.5	1100	1	101.5±6.2
[017]	72.16W,42.53N	TE-CF			0	NH4NO3		5	6.5	1100	1	89.4±5.8
[017]	72.16W,42.53N	TE-CF			15	NH4NO3		5	6.5	1100	1	76.5±5.1
[018]	128.66E,35.25N	TE-CF			0			2	13.1	1490	3	3.08±0.21	1.93±0.2												45±3.5	43±3	12±1
[018]	128.66E,35.25N	TE-CF			11.3	N3P4K1		2	13.1	1490	3	3.05±0.11	2.37±0.26
[018]	128.66E,35.25N	TE-CF			0			3	13.1	1490	3	2.82±0.2	1.91±0.19					24±2.8	0.8±0.1 g kg-1
[018]	128.66E,35.25N	TE-CF			11.3	N3P4K1		3	13.1	1490	3	3.19±0.23	1.64±3.19					28.2±2.1	0.9±0.1
[019]	112.2E,36.6N	TE-CF	2		0	NH4NO3	7.25±0.15	5	9.9	662	3	1.96±0.15	1.8±0.15	0.16±0.04	11.42±0.19	33.15±0.35	80±6(g m-3)	34.85±5.77(g kg-1)	1.87±0.22 (g kg-1)	400±20(mg kg-1)
[019]	112.2E,36.6N	TE-CF			5	NH4NO3	6.55±0.13	5	9.9	662	3	2±0.2	1.47±0.1	0.53±0.1	11.58±0.22	33.72±0.32	125±12	26.51±3.55	1.59±0.14	380±38
[019]	112.2E,36.6N	TE-CF			10	NH4NO3	6.22±0.13	5	9.9	662	3	1.98±0.22	1.2±0.1	0.78±0.1	11.11±0.18	33.68±0.31	133±6	28.45±2.67	1.57±0.1	320±30
[019]	112.2E,36.6N	TE-CF			15	NH4NO3	5.79±0.16	5	9.9	662	3	2.28±0.22	1.468±0.12	0.82±0.1	11.33±0.18	33±0.31	98±8	25.17±4.42	1.66±0.18	300±10
[020]	39.27E,11.7N	TR-DF	0.1		0	NH4NO3	7.4	1	17.45	198	4								0.028±0.003 (mg kg-1)						80	13	7
[020]	39.27E,11.7N	TR-DF			7	NH4NO3		1	17.45	198	4								0.032±0.003
[020]	39.27E,11.7N	TR-DF			15	NH4NO3		1	17.45	198	4								0.037±0.003
[021]	102.55E,32.8N	GLD	1		0	NH4NO3	6.12±0.27	1	1.5	747	5	5.9±0.3	3.4±0.16	2.5±0.24				37(g kg-1)	3.5(g kg-1)
[021]	102.55E,32.8N	GLD			2	NH4NO3	5.98±0.27	1	1.5	747	5	5.28±0.27	3.55±0.13	1.73±0.17
[021]	102.55E,32.8N	GLD			4	NH4NO3	5.9±0.26	1	1.5	747	5	5.5±0.2	3.3±0.13	2.2±0.18
[021]	102.55E,32.8N	GLD			8	NH4NO3	5.8±0.26	1	1.5	747	5	5.48±0.22	3.33±0.15	2.15±0.2
[021]	102.55E,32.8N	GLD			16	NH4NO3	5.78±0.26	1	1.5	747	5	4.5±0.17	2.99±0.04	1.51±0.17
[021]	102.55E,32.8N	GLD			32	NH4NO3	5.65±0.25	1	1.5	747	5	4.38±0.2	2.96±0.1	1.42±0.16
[021]	102.55E,32.8N	GLD			0	NH4NO3	6.12±0.27	2	1.5	747	5	4.97±0.24	3.32±0.24	1.65±0.25
[021]	102.55E,32.8N	GLD			2	NH4NO3	5.98±0.27	2	1.5	747	5	4.7±0.28	3.27±0.29	1.43±0.13
[021]	102.55E,32.8N	GLD			4	NH4NO3	5.9±0.26	2	1.5	747	5	4.95±0.3	2.95±0.16	2±0.24
[021]	102.55E,32.8N	GLD			8	NH4NO3	5.8±0.26	2	1.5	747	5	4.2±0.18	3.02±0.16	1.18±0.1
[021]	102.55E,32.8N	GLD			16	NH4NO3	5.78±0.26	2	1.5	747	5	3.65±0.17	2.9±0.2	0.73±0.16
[021]	102.55E,32.8N	GLD			32	NH4NO3	5.65±0.25	2	1.5	747	5	3.6±0.15	3.24±0.2	0.36±0.13
[021]	102.55E,32.8N	GLD			0	NH4NO3	6.12±0.27	3	1.5	747	5	5.6±0.2	1.5±0.2	4.1±0.2						760±88.2	94±19.05	336±47.4	523±88.41
[021]	102.55E,32.8N	GLD			2	NH4NO3	5.98±0.27	3	1.5	747	5	5.2±0.2	1.3±0.1	3.9±0.3						788±91.45	95±19.26	332±46.84	762±128.8
[021]	102.55E,32.8N	GLD			4	NH4NO3	5.9±0.26	3	1.5	747	5	4.9±0.2	1.2±0.15	3.7±0.2						806±93.54	95±19.26	422±59.53	672±113.59
[021]	102.55E,32.8N	GLD			8	NH4NO3	5.8±0.26	3	1.5	747	5	4.7±0.2	1±0.2	3.7±0.2						604±70.09	99±20.07	368±51.91	492±83.16
[021]	102.55E,32.8N	GLD			16	NH4NO3	5.78±0.26	3	1.5	747	5	4.1±0.18	0.9±0.1	3.2±0.2						751±87.16	116±23.52	348±49.09	343±57.98
[021]	102.55E,32.8N	GLD			32	NH4NO3	5.65±0.25	3	1.5	747	5	3.8±0.2	0.75±0.1	3±0.15						565±65.57	107±21.69	361±50.93	353±59.67
[022]	171.92E,43.58S	GLD			0	NH4NO3		0.17		812	8	6.38±0.3	4.35±0.15			42±3		37.8±4.12	3.2±0.1 (g kg-1)
[022]	171.92E,43.58S	GLD			30	NH4NO3		0.17		812	8	5.67±0.28	4.3±0.2			44.6±3.17		38±4.14	3.3±0.1
[023]	102E,30N	TE-CF			0	NH4NO3	6.48	0.5	3	1850	3	2.03±0.3						124.9±6.6	6.8±0.3 (g kg-1)	0.479±0.04(g kg-1)	0.07±0.01
[023]	102E,30N	TE-CF			5	NH4NO3		0.5	3	1850	3	2.32±0.5						181.3±15.5	8.9±1	0.99±0.01	0.25±0.01
[024]	145.75W,63.92N	B-CF	0.1		0	NH4NO3	4.9±0.2	2			4	105±8.51								1234±150	79±12
[024]	145.75W,63.92N	B-CF			20	NH4NO3	5.5±0.1	2			4	106.25±8.61								1073±280	204±46
[025]	19.75E,64.4N	TE-CF	0.3		0	NH4NO3	5.35±0.2	20	1.2	595	3							6742±122 (kg ha-1)	165±6
[025]	19.75E,64.4N	TE-CF			3.4	NH4NO3	5.43±0.03	20	1.2	595	3							9670±788	316±34
[025]	19.75E,64.4N	TE-CF			6.8	NH4NO3	4.6±0.1	20	1.2	595	3							9483±978	351±34
[025]	19.75E,64.4N	TE-CF			10.8	NH4NO3	4.95±0.2	3	1.2	595	3							10839±1628	416±54
[026]	117.75W,33.62N	GLD			0	Ca(NO3)2		1	14	325	5					17±1.21	115±25(g m-2)					390±85(g m-2)
[026]	117.75W,33.62N	GLD			10	Ca(NO3)2		1	14	325	5					15±1.07	100±24					580±40
[027]	112.16E,23.16N	TR-EF	3.3		0	NH4NO3	3.76	3	21	1927	3	69±3			10±0.9	24.8±1.76	124±25(g m-2)	3.2	2.5(mg g-1)	700±30(mg kg-1)				842±164(g m-2)
[027]	112.16E,23.16N	TR-EF			5	NH4NO3		3	21	1927	3	72±3			10±0.9	24.9±1.77	91±9			640±40				742±140
[027]	112.16E,23.16N	TR-EF			10	NH4NO3		3	21	1927	3	63±1			10±0.9	24.5±1.74	74±8			590±30				728±146
[027]	112.16E,23.16N	TR-EF			15	NH4NO3		3	21	1927	3	59±3			10±0.9	24.6±1.75	50±6			550±70				868±157
[028]	113.86E,38.68N	TE-DF	2.35		0	mixed N		2	13.1	650	6	4.46±0.55						44±4.5
[028]	113.86E,38.68N	TE-DF			4.8	mixed N		2	13.1	650	6	4.81±0.11						40±3.3
[028]	113.86E,38.68N	TE-DF			4.8	mixed N		2	13.1	650	6	4.7±0.31						41.5±3.8
[028]	113.86E,38.68N	TE-DF			4.8	mixed N		2	13.1	650	6	4.43±0.4						45±3.4
[028]	113.86E,38.68N	TE-DF			4.8	mixed N		2	13.1	650	6	4.54±0.4						46.7±4.8
[028]	113.86E,38.68N	TE-DF			4.8	mixed N		2	13.1	650	6	4.37±0.2						45±4.6
[029]	112.16E,23.16N	subTR-EF			0	NH4NO3	3.76	13	21	1930	3	91.8±4.05						25.4±3.44)	1.8±0.14 (g kg-1)					842±164
[029]	112.16E,23.16N	subTR-EF			5	NH4NO3		13	21	1930	3	88.2±2.27						29.6±2.54	2.3±0.28					742±140
[029]	112.16E,23.16N	subTR-EF			10	NH4NO3		13	21	1930	3	85.4±1.4						30.2±0.46	2.2±0.07					728±146
[029]	112.16E,23.16N	subTR-EF			15	NH4NO3		13	21	1930	3	61.2±0.86						31.9±0.77	2.5±0.08					868±157
[030]	119.38E,50.18N	GLD			0	NH4NO3	6.91	3.5	-2.4	358	5	1.86±0.05	1.24±0.5	0.62±0.25	2.98	0.133				255.84±50(mg kg-1)	24.63±2	240±15	200±20					258.48±27.74(g m-2)	204.4±15.35
[030]	119.38E,50.18N	GLD			10	NH4NO3		3.5	-2.4	358	5	1.9±0.03	1.18±0.02	0.72±0.01						315±45	35±8	420±20	160±15					432.92±38.41	162.21±14.28
[031]	98.68E,29.26N	TE-CF			0	NH4NO3		1	3.8	540	3	0.74±0.07	0.49±0.05	0.25±0.03	8.86±0.69	15.04±2.38	48±6(g m-2)	5±0.54(%)	2.81g±1(g kg-1)
[031]	98.68E,29.26N	TE-CF			5	NH4NO3		1	3.8	540	3	1.22±0.13	0.84±0.09	0.38±0.05	8.8±0.67	16.99±2.29	60±7	6±1.8
[031]	98.68E,29.27N	TE-CF			10	NH4NO3		1	3.8	540	3	1.3±0.11	0.84±0.09	0.46±0.04	8.58±0.67	18.02±2.19	71±8	2.6±0.4
[031]	98.68E,29.26N	TE-CF			15	NH4NO3		1	3.8	540	3	0.96±0.09	0.59±0.06	0.37±0.05	8.56±0.69	18.44±1.86	45±6	3±0.33
[031]	94.72E,29.63N	TE-CF			0	NH4NO3		1	-0.7	1134	3	0.81±0.13	0.4±0.06	0.41±0.1	5.79±1.11	32.23±2.51	28±2	10±2	6.08±1.58
[031]	94.72E,29.63N	TE-CF			5	NH4NO3		1	-0.7	1134	3	1.19±0.21	0.61±0.1	0.58±0.13	5.82±1.04	29.63±3.03	43±6	13±2
[031]	94.72E,29.64N	TE-CF			10	NH4NO3		1	-0.7	1134	3	1.01±0.15	0.51±0.09	0.5±0.1	5.78±1.04	32.36±2.42	45±1.5	20±3
[031]	94.72E,29.63N	TE-CF			15	NH4NO3		1	-0.7	1134	3	0.84±0.13	0.42±0.07	0.41±0.09	5.79±1.09	31.64±2.34	40±2	9.8±2.5
[032]	127.54E,45.3N	TE-CF	1.92		0	NH4NO3		1	2.7	700	1	2.35±0.05			11.2±0.32	27.8±0.56
[032]	127.54E,45.3N	TE-CF			5	NH4NO3		1	2.7	700	1	2.43±0.07			10.7±0.35	32.2±0.58
[032]	127.54E,45.4N	TE-CF			10	NH4NO3		1	2.7	700	1	2.57±0.06			12.8±0.25	23.1±0.58
[032]	127.54E,45.3N	TE-CF			15	NH4NO3		1	2.7	700	1	2.7±0.05			11.9±0.26	25.3±0.52
[032]	127.54E,45.3N	TE-CF			0	NH4NO3		2	2.7	700	2	2.67±0.06			13±0.31	25.7±0.58
[032]	127.54E,45.3N	TE-CF			5	NH4NO3		2	2.7	700	2	2.83±0.06			11.5±0.27	27.8±0.57
[032]	127.54E,45.4N	TE-CF			10	NH4NO3		2	2.7	700	2	2.39±0.05			12.3±0.37	31±0.57
[032]	127.54E,45.3N	TE-CF			15	NH4NO3		2	2.7	700	2	2.43±0.06			10.8±0.29	27.8±0.52
[032]	127.54E,45.3N	TE-CF			0	NH4NO3	5.98±0.1	3	2.7	700	3	2.9±0.05	10.8±1.2		12.5±0.21	22.1±0.53	295.4±39.35	82±5.4	6.52±0.45(mg kg-1,10cm)	960±100	182±25
[032]	127.54E,45.3N	TE-CF			5	NH4NO3	5.98±0.16	3	2.7	700	3	2.65±0.07	8.6±1		11.3±0.35	25±0.58	273.6±36.44	82.3±5.6	6.77±0.49	935±80	157±25
[032]	127.54E,45.4N	TE-CF			10	NH4NO3	5.35±0.15	3	2.7	700	3	2.5±0.07	8.2±1.1		13.8±0.35	23.3±0.57	257.8±34.34	89.6±5.2	6.9±0.45	896±90	136±28
[032]	127.54E,45.3N	TE-CF			15	NH4NO3	5.1±0.14	3	2.7	700	3	2.21±0.06	7±0.5		10.9±0.28	29.2±0.52	228±30.37	83.5±4.9	7.53±0.51	857±70	118±15
[033]	91.1E,30.85N	GLD	1.1		0	NH4NO3	7.2±0.19	1	1.3	477	4	1.95±0.7								249.98±14.53(mg kg-1)		59.38±4.86(g m-2)	600.42±12.96		67.02	18.24	14.74
[033]	91.1E,30.85N	GLD			4	NH4NO3	6.95±0.11	1	1.3	477	4	2.9±1.2								300.56±31.45		108.31±5.02	752.66±41.03
[033]	91.1E,30.85N	GLD			0	NH4NO3	6.82±0.21	2	1.3	477	4	1.78±0.66								184.64±32.07		57.52±5.26	549.67±22.67
[033]	91.1E,30.85N	GLD			4	NH4NO3	6.39±0.12	2	1.3	477	4	2.5±1.05								369.22±14.26		106.77±17.17	741.87±37.79
[033]	91.1E,30.85N	GLD			0	NH4NO3	6.96±0.11	3	1.3	477	4	1.2±0.1								213.56±29.62		44.16±7.05	417.94±60.46
[033]	91.1E,30.85N	GLD			4	NH4NO3	5.9±0.15	3	1.3	477	4	1.6±0.13								326.69±11.94		78.99±10.29	500.0±50.75
[034]	113E,28.1N	subTR-EF	3.92		0	NH4NO3		1	17.2	1422	4	10.94±1.29					77.95±6.21(g m-2)			100±11.6	13±1
[034]	113E,28.1N	subTR-EF			5	NH4NO3		1	17.2	1422	4	6.89±0.87					66.81±5.25	13.65	1.31	80±9.28	22±10
[034]	113E,28.1N	subTR-EF			15	NH4NO3		1	17.2	1422	4	6.67±0.67					65.79±7.28			88±10.21	24±12
[034]	113E,28.1N	subTR-EF			30	NH4NO3		1	17.2	1422	4	6.98±0.80					62.21±6.37			93±10.79	34±18
[034]	113E,28.1N	subTR-CF			0	NH4NO3		1	17.2	1422	4	6.02±0.81					54.22±4.45
[034]	113E,28.1N	subTR-CF			5	NH4NO3		1	17.2	1422	4	4.35±0.52					51.39±4.72
[034]	113E,28.1N	subTR-CF			15	NH4NO3		1	17.2	1422	4	4.68±0.52					51.24±5.14
[034]	113E,28.1N	subTR-CF			30	NH4NO3		1	17.2	1422	4	4.23±0.40					49.93±3.72
[035]	103.25E,29.55N	subTR-EF			0	NH4NO3		1	10	2323	3	1.92±0.18	1.4±0.12	0.52±0.04	10.9±0.98	100±7.12				1.85±0.21(g kg-1)	0.24±0.05
[035]	103.25E,29.55N	subTR-EF			5	NH4NO3		1	10	2323	3	1.5±0.18	1.16±0.12	0.34±0.04	10.8±0.97	102±7.26				1.5±0.17	0.19±0.04
[035]	103.25E,29.55N	subTR-EF			15	NH4NO3		1	10	2323	3	1.17±0.09	1.02±0.06	0.15±0.008	10.8±0.97	105±7.47				2±0.23	0.26±0.05
[036]	102.9E,26.2N	subTR-EF			0	(NH4)2SO4		1	6.5	153	3	5.61±0.44	4.7±0.42	0.91±0.154
[036]	102.9E,26.2N	subTR-EF			5	(NH4)2SO4		1	6.5	153	3	5.45±0.57	4.56±0.55	0.89±0.18
[036]	102.9E,26.2N	subTR-EF			15	(NH4)2SO4		1	6.5	153	3	5.73±0.4	4.79±0.4	0.94±0.14
[036]	102.9E,26.2N	subTR-EF			30	(NH4)2SO4		1	6.5	153	3	6.54±0.61	5.46±0.6	1.08±0.11
[036]	102.9E,26.2N	subTR-EF			5	NaNO3		1	6.5	153	3	6.21±0.1	5.18±0.11	1.03±0.17
[036]	102.9E,26.2N	subTR-EF			15	NaNO3		1	6.5	153	3	6.38±0.14	5.31±0.16	1.07±0.14
[036]	102.9E,26.2N	subTR-EF			30	NaNO3		1	6.5	153	3	7.1±0.21	5.92±0.21	1.18±0.12
[036]	102.9E,26.2N	subTR-EF			5	NH4NO3		1	6.5	153	3	6.98±0.43	5.82±0.42	1.16±0.14
[036]	102.9E,26.2N	subTR-EF			15	NH4NO3		1	6.5	153	3	6.99±0.63	5.83±0.63	1.16±0.17
[036]	102.9E,26.2N	subTR-EF			30	NH4NO3		1	6.5	153	3	5.25±0.77	4.28±0.79	0.97±0.06
[036]	102.9E,26.2N	subTR-EF			0	(NH4)2SO4		2	6.5	153	3	5.51±0.25	4.6±0.26	0.91±0.16
[036]	102.9E,26.2N	subTR-EF			5	(NH4)2SO4		2	6.5	153	3	5.22±0.08	4.36±0.08	0.86±0.09
[036]	102.9E,26.2N	subTR-EF			15	(NH4)2SO4		2	6.5	153	3	5.32±0.08	4.44±0.08	0.88±0.1
[036]	102.9E,26.2N	subTR-EF			30	(NH4)2SO4		2	6.5	153	3	5.46±0.2	4.55±0.2	0.91±0.11
[036]	102.9E,26.2N	subTR-EF			5	NaNO3		2	6.5	153	3	5.11±0.09	4.27±0.08	0.84±0.15
[036]	102.9E,26.2N	subTR-EF			15	NaNO3		2	6.5	153	3	5.38±0.34	4.49±0.33	0.89±0.14
[036]	102.9E,26.2N	subTR-EF			30	NaNO3		2	6.5	153	3	5.51±0.47	4.60±0.46	0.91±0.186
[036]	102.9E,26.2N	subTR-EF			5	NH4NO3		2	6.5	153	3	5.56±0.06	4.62±0.1	0.94±0.07
[036]	102.9E,26.2N	subTR-EF			15	NH4NO3		2	6.5	153	3	5.53±0.17	4.61±0.2	0.92±0.18
[036]	102.9E,26.2N	subTR-EF			30	NH4NO3		2	6.5	153	3	5.41±0.24	4.52±0.24	0.89±0.14
[036]	102.9E,26.2N	subTR-EF			0	(NH4)2SO4		3	6.5	153	3	4.49±0.29	3.75±0.27	0.74±0.35						204.34±10.5(mg kg-1)	40.22±3.55
[036]	102.9E,26.2N	subTR-EF			5	(NH4)2SO4		3	6.5	153	3	4.17±0.08	3.49±0.07	0.68±0.29						201.59±10.94	42.61±2.68
[036]	102.9E,26.2N	subTR-EF			15	(NH4)2SO4		3	6.5	153	3	4.48±0.29	3.73±0.29	0.75±0.29						210.71±9.34	40.94±3.4
[036]	102.9E,26.2N	subTR-EF			30	(NH4)2SO4		3	6.5	153	3	4.32±0.17	3.60±0.16	0.72±0.26						197.31±8.83	37.76±1.59
[036]	102.9E,26.2N	subTR-EF			5	NaNO3		3	6.5	153	3	4.45±0.31	3.71±0.32	0.74±0.31						192.75±10.21	40.87±1.23
[036]	102.9E,26.2N	subTR-EF			15	NaNO3		3	6.5	153	3	4.34±0.21	3.62±0.22	0.72±0.28						181.38±10.43	40.44±2.17
[036]	102.9E,26.2N	subTR-EF			30	NaNO3		3	6.5	153	3	4.40±0.28	3.68±0.27	0.72±0.24						214.33±11.88	44.20±5.14
[036]	102.9E,26.2N	subTR-EF			5	NH4NO3		3	6.5	153	3	4.48±0.23	3.74±0.23	0.74±0.24						216.65±10.65	43.33±3.186
[036]	102.9E,26.2N	subTR-EF			15	NH4NO3		3	6.5	153	3	4.37±0.23	3.64±0.23	0.73±0.24						220.49±9.34	42.61±4.49
[036]	102.9E,26.2N	subTR-EF			30	NH4NO3		3	6.5	153	3	5.65±0.22	4.7±0.22	0.95±0.06						184.78±8.62	40.07±2.17
[037]	171.75E,43.03S	GLD		7.9±1.8(mg m-2)	0	NH4NO3		1.6			5	0.96±0.08	0.68±0.07	0.28±0.03	9.6		389±51(g m-2)	41.7±2.4	3.3±0.2 (g kg-1)	639±34
[037]	171.75E,43.03S	GLD		11.8±3.8	5	NH4NO3		1.6			5	1.07±0.08	0.63±0.07	0.44±0.05			518±83	44.9±1	3.5±0.1	655±24
[038]	133.67E,47.82N	Wetland			0	NH4NO3		1	2.5	600	3	6.58±0.16			16.45±0.2	44.81±2.3	663±26(g m-2)
[038]	133.67E,47.82N	Wetland			4	NH4NO3		1	2.5	600	3	7.36±0.23			16.04±0.3	44.00±1.8	686±40
[038]	133.67E,47.82N	Wetland			8	NH4NO3		1	2.5	600	3	8.39±0.14			16.00±0.2	42.80±2.1	800±28
[038]	133.67E,47.82N	Wetland			0	NH4NO3		2	2.5	600	3	5.18±0.13			16.08±0.3	44.27±2.2	1111±21
[038]	133.67E,47.82N	Wetland			4	NH4NO3		2	2.5	600	3	5.18±0.13			15.24±0.4	42.24±2.1	1445±17
[038]	133.67E,47.82N	Wetland			8	NH4NO3		2	2.5	600	3	4.96±0.21			15.13±0.3	42.04±1.6	1538±12
[038]	133.67E,47.82N	Wetland			0	NH4NO3	5.17±0.012	3	2.5	600	3	4.74±0.13			15.52±0.3	51.98±1.8	1200±30
[038]	133.67E,47.82N	Wetland			4	NH4NO3	5.13±0.015	3	2.5	600	3	5.46±0.16			15.09±0.2	50.23±1.7	1350±20
[038]	133.67E,47.82N	Wetland			8	NH4NO3	5.04±0.014	3	2.5	600	3	4.01±0.11			15.05±0.4	50.86±1.3	1300±60					0.10371	0.10922	0.00551
[039]	116.5E,25.7N	SubTR-DF			0	NH4NO3		1.5	1.5	1737	6	3.47±0.09	2.26±0.1	1.21±0.16	21.57±0.12	20.9±1.49		12.38±1,26(g kg-1)	0.98±0.17
[039]	116.5E,25.7N	SubTR-DF			6	NH4NO3		1.5	1.5	1737	6	4.04±0.08	2.63±0.07	1.41±0.12	21.76±0.06	20.7±1.47
[039]	116.5E,25.7N	SubTR-DF			24	NH4NO3		1.5	1.5	1737	6	3.23±0.11	1.92±0.05	1.31±0.06	21.62±0.17	20.7±1.47
[040]	116.5E,44.8N	GLD	2.26		0	NH4NO3		1	0.7	330	3						442.89±22.14(g m-2)		1.04±0.05	260.53±40.19(mg kg-1)		187.62±31.98(g m-2)
[040]	116.5E,44.8N	GLD			2	NH4NO3		1	0.7	330	3						480.71±24.04		1.12±0.08	296.84±4.47		214.81±79.48
[040]	116.5E,44.8N	GLD			5	NH4NO3		1	0.7	330	3						447.86±42.23		1.21±0.05	323.68±11.16		216.70±67.72
[040]	116.5E,44.8N	GLD			10	NH4NO3		1	0.7	330	3						500.98±25.05		1.15±0.1	313.42±14.51		233.10±29.17
[040]	116.5E,44.8N	GLD			25	NH4NO3		1	0.7	330	3						445.87±22.29		1.13±0.1	337.89±11.16		201.93±41.42
[040]	116.5E,44.8N	GLD	2.26		0	NH4NO3		2	0.7	330	3	251.67±17					555.52±55.04		1.17±0.11 (g kg-1)	248.68±16.75		237.40±49.38
[040]	116.5E,44.8N	GLD			2	NH4NO3		2	0.7	330	3	241.34±17					613.71±43.92		1.15±0.11	237.63±11.88		295.66±29.56
[040]	116.5E,44.8N	GLD			5	NH4NO3		2	0.7	330	3	269.61±31					466.8±36.33		1.28±0.12	236.84±22.33		313.42±54.05
[040]	116.5E,44.8N	GLD			10	NH4NO3		2	0.7	330	3	269.03±13					565.87±75.62		1.2±0.11	250.26±12.51		357.58±45.4
[040]	116.5E,44.8N	GLD			25	NH4NO3		2	0.7	330	3	283.64±20					593.26±97.3		1.3±0.12	217.11±27.91		413.07±17.22
[041]	172.3E,43.66S	GLD			0	NH4NO3	6.15±0.12	1	12.1	451	3	2.2±0.1						31.9	2.77±0.02(mg g-1)
[041]	172.3E,43.66S	GLD			1	NH4NO3		1	12.1	451	3	2±0.1
[042]	112.8E,42.2N	GLD			0	NH4NO3		3	5.46	204	6	1.2±0.04			17.5±0.44	4.19±0.12		11.94±0.42(g/kg)	1.14±0.02(g kg-1)									73.33±3.35(g m-2)	551.95±46.36
[042]	112.8E,42.2N	GLD			3.5	NH4NO3		3	5.46	204	6	1.19±0.06			17.41±0.51	4.31±0.24		11.76±0.47	1.34±0.04									119.10±3.36	799.21±35.32
[042]	112.8E,42.2N	GLD			0	NH4NO3		4	5.46	204	6	1.82±0.05			15.61±0.52	8.57±0.33		13.48±0.4	1.316±0.03									170.06±6.71	973.61±77.27
[042]	112.8E,42.2N	GLD			3.5	NH4NO3		4	5.46	204	6	1.94±0.07			15.68±0.38	8.3±0.43		14.23±0.47	1.548±0.015									234.14±11.6	1295.93±77.27
[043]	13.1E,56.7N	TE-CF			0	NH4NO3		3			5	68.9±14.7
[043]	13.1E,56.7N	TE-CF			20	NH4NO3		3			5	53.5±1.6
[043]	13.1E,56.7N	TE-CF			20	NH4NO3		3			5	73.4±7.8
[044]	100.25E,37.3N	GLD			0	NH4NO3		3	0.08	387	5	2.89±0.48						20.5g kg-1	2.5g kg-1						61	33.4	4.9
[044]	100.25E,37.3N	GLD			10	NH4NO3		3	0.08	387	5	3.02±0.6
[044]	100.25E,37.3N	GLD			0	NH4NO3		3	0.08	387	5	3.03±0.62
[044]	100.25E,37.3N	GLD			10	NH4NO3		3	0.08	387	5	3.04±0.54
[044]	100.25E,37.3N	GLD			0	NH4NO3		3	0.08	387	5	2.75±1	2±0.6	0.75±0.225			1.23					108±30(g m-2)	1010±450
[044]	100.25E,37.3N	GLD			10	NH4NO3		3	0.08	387	5	2.7±1.05	1.9±0.8	0.8±0.33								168±60	1200±400
[045]	61W,5N	TR-EF			0	NaNO3	3.3	1	20.6	2200	5	12.41±3.19	160±50				12.2		12.7	1.17±0.31
[045]	61W,5N	TR-EF			30	NaNO3		1	20.6	2200	5	9.9±3.17	160±50							1.25±0.33
[045]	61W,5N	TR-EF			0	NaNO3	3.1	1	20.6	2200	5	10.24±3.43	180±20				9.6		15.4	1.18±0.38
[045]	61W,5N	TR-EF			30	NaNO3		1	20.6	2200	5	9.72±3.46	140±30							1.45±0.23
[045]	61W,5N	TR-EF			0	NaNO3	3.3	1	20.6	2200	5	8.96±2.46	150±40				11.4		10.1	0.94±0.1
[045]	61W,5N	TR-EF			30	NaNO3		1	20.6	2200	5	10.96±2.92	150±50							1.3±0.28
[046]	145.75W,63.92N	B-CF			0	NH4NO3	5.5±0.2	5		38.5	4	78.3±6.5						19.5±0.7(g m-2)		445±41(ug g-1)	41±8.5	171±40(g m-2)						98±25(g m-2)
[046]	145.75W,63.92N	B-CF			10	NH4NO3	5.9±0.1	5		38.5	4	54.4±4.1						13.5±0.6		171±16	22.7±9.6	280±52						255±57
[047]	103.23E,29.7N	subTR-EF	9.7		0	NH4NO3		2	15.9	1490	3	1.13±0.03	0.58±0.06	0.55±0.01	15.76±0.05	38.7±2.75	127±56(g m-2)		0.81mg g-1
[047]	103.23E,29.7N	subTR-EF			5	NH4NO3		2	15.9	1490	3	1.42±0.04	0.75±0.08	0.68±0.06	15.73±0.04	38.4±2.73	177±63
[047]	103.23E,29.7N	subTR-EF			15	NH4NO3		2	15.9	1490	3	1.44±0.03	0.73±0.08	0.72±0.01	15.82±0.06	38.4±2.73	142±82
[047]	103.23E,29.7N	subTR-EF			30	NH4NO3		2	15.9	1490	3	1.71±0.01	0.88±0.09	0.83±0.02	15.83±0.06	38.4±2.71	210±116
[048]	12.3E,55.66N	GLD			0	mixed N	7.16±0.13	4			5	6.75±0.3						14.5±1.58	1.5±0.14 (g kg-1)	68±18(mg kg-1)
[048]	12.3E,55.66N	GLD			10	mixed N	7.54±0.09	4			5	7.3±1						15.2±1.66	1.61±0.15	95±8
[049]	19.45E, 64.1N	TE-CF			0		5.56±0.12		1.2	600	4	188±13.4
[049]	19.45E, 64.1N	TE-CF			7.5	mixed N	4.95		1.2	600	4	102
[049]	14.75E,57.1N(SE)	TE-CF			0		5.25±0.06	16	5.2	700	4	121±7.9
[049]	14.75E,57.1N(SE)	TE-CF			7.5	mixed N	4.68±0.21	16	5.2	700	4	102±6.66
[049]	13.2E,56.55N(SW)	TE-CF			0		4.1±0.06	14	7.1	1100	4	63.6±3.4
[049]	13.2E,56.55N(SW)	TE-CF			10	NH4SO4	4.16±0.19	14	7.1	1100	4	40.6±2.17
[050]	109E,26N	subTR-DF			0	NH4NO3		3	19	1389	3	18.34±1.77					40.05±10.45(g m-2)							8.34±0.77(t ha-1)
[050]	109E,26N	subTR-DF			5	NH4NO3		3	19	1389	3	30.18±2.22					24.68±15.87							9.46±0.48
[050]	109E,26N	subTR-DF			10	NH4NO3		3	19	1389	3	28.8±2.6					9.6±4.8							10.09±1.39
[050]	109E,26N	subTR-DF			0	NH4NO3		3	19	1389	3	23.13±4.77					13.7±5.2							9.05±1.74
[050]	109E,26N	subTR-DF			5	NH4NO3		3	19	1389	3	24.65±1.5					15.3±2.5							8.78±1.97
[050]	109E,26N	subTR-DF			10	NH4NO3		3	19	1389	3	36.11±5.73					28.56±6.57							10.12±2.4
[051]	121.5E,50.93N	BF-CF	0.55		0	NH4NO3		2	-5.4	500	3	4.8±0.15
[051]	121.5E,50.93N	BF-CF			2	NH4NO3		2	-5.4	500	3	4.9±0.4
[051]	121.5E,50.93N	BF-CF			5	NH4NO3		2	-5.4	500	3	5.1±0.1
[051]	121.5E,50.93N	BF-CF			10	NH4NO3		2	-5.4	500	3	5.2±0.2
[051]	121.5E,50.93N	BF-CF			0	NH4NO3		3	-5.4	500	3	4±0.3
[051]	121.5E,50.93N	BF-CF			2	NH4NO3		3	-5.4	500	3	4.2±0.48
[051]	121.5E,50.93N	BF-CF			5	NH4NO3		3	-5.4	500	3	4.4±0.1
[051]	121.5E,50.93N	BF-CF			10	NH4NO3		3	-5.4	500	3	4.42±0.15
[051]	121.5E,50.93N	BF-CF			0	NH4NO3		4	-5.4	500	3	4.6±0.17
[051]	121.5E,50.93N	BF-CF			2	NH4NO3		4	-5.4	500	3	5±0.3
[051]	121.5E,50.93N	BF-CF			5	NH4NO3		4	-5.4	500	3	5±0.51
[051]	121.5E,50.93N	BF-CF			10	NH4NO3		4	-5.4	500	3	4.9±0.24
[051]	121.5E,50.93N	BF-CF			0	NH4NO3		5	-5.4	500	3	4.3±0.1
[051]	121.5E,50.93N	BF-CF			2	NH4NO3		5	-5.4	500	3	4.43±0.3
[051]	121.5E,50.93N	BF-CF			5	NH4NO3		5	-5.4	500	3	4.27±0.1
[051]	121.5E,50.93N	BF-CF			10	NH4NO3		5	-5.4	500	3	3.8±0.4
[051]	121.5E,50.93N	BF-CF			0	NH4NO3		6	-5.4	500	3	3.5±0.27
[051]	121.5E,50.93N	BF-CF			2	NH4NO3		6	-5.4	500	3	3.9±0.5
[051]	121.5E,50.93N	BF-CF			5	NH4NO3		6	-5.4	500	3	3.6±0.27
[051]	121.5E,50.93N	BF-CF			10	NH4NO3		6	-5.4	500	3	3.25±0.16
[051]	121.5E,50.93N	BF-CF			0	NH4NO3		7	-5.4	500	3	3.7±0.35
[051]	121.5E,50.93N	BF-CF			2	NH4NO3		7	-5.4	500	3	3.87±0.47
[051]	121.5E,50.93N	BF-CF			5	NH4NO3		7	-5.4	500	3	3.73±0.38
[051]	121.5E,50.93N	BF-CF			10	NH4NO3		7	-5.4	500	3	3.15±0.13
[051]	121.5E,50.93N	BF-CF			0	NH4NO3		8	-5.4	500	3	4.38±0.18
[051]	121.5E,50.93N	BF-CF			2	NH4NO3		8	-5.4	500	3	4.4±0.23
[051]	121.5E,50.93N	BF-CF			5	NH4NO3		8	-5.4	500	3	4.4±0.15
[051]	121.5E,50.93N	BF-CF			10	NH4NO3		8	-5.4	500	3	3.73±0.07
[051]	121.5E,50.93N	BF-CF			0	NH4NO3		9	-5.4	500	3	4.67±0.25
[051]	121.5E,50.93N	BF-CF			2	NH4NO3		9	-5.4	500	3	4.17±0.1
[051]	121.5E,50.93N	BF-CF			5	NH4NO3		9	-5.4	500	3	4±0.21
[051]	121.5E,50.93N	BF-CF			10	NH4NO3		9	-5.4	500	3	3.98±0.28
[051]	121.5E,50.93N	BF-CF			0	NH4NO3		10	-5.4	500	3	4.18±0.11
[051]	121.5E,50.93N	BF-CF			2	NH4NO3		10	-5.4	500	3	4.1±0.15
[051]	121.5E,50.93N	BF-CF			5	NH4NO3		10	-5.4	500	3	3.8±0.12
[051]	121.5E,50.93N	BF-CF			10	NH4NO3		10	-5.4	500	3	3.76±0.24
[051]	121.5E,50.93N	BF-CF			0	NH4NO3		11	-5.4	500	3	6.4±0.35
[051]	121.5E,50.93N	BF-CF			2	NH4NO3		11	-5.4	500	3	5.46±0.5
[051]	121.5E,50.93N	BF-CF			5	NH4NO3		11	-5.4	500	3	5.17±0.15
[051]	121.5E,50.93N	BF-CF			10	NH4NO3		11	-5.4	500	3	5±0.3
[052]	117.18E,31.85N	subTR-DF	1.78		0	NH4NO3	4.58 ± 0.1	1	16.5	1300	3	2873.6±171.5						30.9±1.4	1.2±0.0(g kg-1)	128.2±19.3(mg kg-1)	26.2±2.8
[052]	117.18E,31.85N	subTR-DF			5	NH4NO3	4.55 ± 0.1	1	16.5	1300	3	3050.64±258.36						34.9±1.7	1.4±0.1	158.3±24.2	28.2±3.4
[052]	117.18E,31.85N	subTR-DF			10	NH4NO3	4.46 ± 0.1	1	16.5	1300	3	3036.58±141.42						34.4±1.7	1.3±0.0	163.1±27.3	31.3±3.3
[052]	117.03E,31.73N	subTR-DF	1.73		0	NH4NO3	4.64 ± 0.1	1	16.5	1300	3	2627±173						17.2±1.1	0.7±0.1	96.0±12.5	21.9±2.9
[052]	117.03E,31.73N	subTR-DF			5	NH4NO3	4.76 ± 0.2	1	16.5	1300	3	2917.44±278.41						13.6±0.6	0.5±0.0	64.50±8.2	18.1±1.9
[052]	117.03E,31.73N	subTR-DF			10	NH4NO3	4.69 ± 0.1	1	16.5	1300	3	2915.37±201						18.0±1.2	0.8±0.1	83.8±14.8	21.6±2.2
[052]	116.56E,31.07N	subTR-DF	1.64		0	NH4NO3	5.10 ± 0.1	1	16.5	1300	3	2824±219						24.2±1.6	1.1±0.1	101.7±8.9	41.8±3.1
[052]	116.56E,31.07N	subTR-DF			5	NH4NO3	5.04 ± 0.1	1	16.5	1300	3	2959±145.5						40.3±2.7	1.7±0.1	146.6±15.1	55.6±3.7
[052]	116.56E,31.07N	subTR-DF			10	NH4NO3	5.08 ± 0.1	1	16.5	1300	3	2887.6±111.4						29.3±2.4	1.3±0.1	133.5±20.1	47.4±3.5
[053]	112.16E,23.16N	TR-EF	4.4		0	NH4NO3		4	21	1927	3	546±19
[053]	112.16E,23.16N	TR-EF			15	NH4NO3		4	21	1927	3	461±56
[053]	112.16E,23.16N	TR-EF			0	NH4NO3		4	21	1927	3	430±50
[053]	112.16E,23.16N	TR-EF			15	NH4NO3		4	21	1927	3	390±61
[053]	112.16E,23.16N	TR-EF			0	NH4NO3		4	21	1927	3	465±60
[053]	112.16E,23.16N	TR-EF			15	NH4NO3		4	21	1927	3	398±12
[053]	112.16E,23.16N	TR-EF			0	NH4NO3		5	21	1927	3	667±42
[053]	112.16E,23.16N	TR-EF			15	NH4NO3		5	21	1927	3	686±25
[053]	112.16E,23.16N	TR-EF			0	NH4NO3		5	21	1927	3	570±106
[053]	112.16E,23.16N	TR-EF			15	NH4NO3		5	21	1927	3	576±44
[053]	112.16E,23.16N	TR-EF			0	NH4NO3		5	21	1927	3	535±28
[053]	112.16E,23.16N	TR-EF			15	NH4NO3		5	21	1927	3	529±32
[053]	112.16E,23.16N	TR-EF			0	NH4NO3		6	21	1927	3	513±67
[053]	112.16E,23.16N	TR-EF			15	NH4NO3		6	21	1927	3	580±38
[053]	112.16E,23.16N	TR-EF			0	NH4NO3		6	21	1927	3	494±37
[053]	112.16E,23.16N	TR-EF			15	NH4NO3		6	21	1927	3	484±104
[053]	112.16E,23.16N	TR-EF			0	NH4NO3		6	21	1927	3	491±47
[053]	112.16E,23.16N	TR-EF			15	NH4NO3		6	21	1927	3	491±57
[053]	112.16E,23.16N	TR-EF			0	NH4NO3		8	21	1927	3	533±20
[053]	112.16E,23.16N	TR-EF			5	NH4NO3		8	21	1927	3	507.8±47.2
[053]	112.16E,23.16N	TR-EF			10	NH4NO3		8	21	1927	3	480±72
[053]	112.16E,23.16N	TR-EF			0	NH4NO3		8	21	1927	3	642±38
[053]	112.16E,23.16N	TR-EF			15	NH4NO3		8	21	1927	3	561±52
[053]	112.16E,23.16N	TR-EF			0	NH4NO3		8	21	1927	3	410±49
[053]	112.16E,23.16N	TR-EF			5	NH4NO3		8	21	1927	3	412±20
[053]	112.16E,23.16N	TR-EF			10	NH4NO3		8	21	1927	3	448±20
[053]	112.16E,23.16N	TR-EF			0	NH4NO3		8	21	1927	3	412±46
[053]	112.16E,23.16N	TR-EF			15	NH4NO3		8	21	1927	3	378±61
[053]	112.16E,23.16N	TR-EF			0	NH4NO3		8	21	1927	3	420±42
[053]	112.16E,23.16N	TR-EF			5	NH4NO3		8	21	1927	3	503±26
[053]	112.16E,23.16N	TR-EF			10	NH4NO3		8	21	1927	3	393±33
[053]	112.16E,23.16N	TR-EF			0	NH4NO3		8	21	1927	3	423±42
[053]	112.16E,23.16N	TR-EF			15	NH4NO3		8	21	1927	3	328±59
[053]	112.16E,23.16N	TR-EF			0	NH4NO3		9	21	1927	3	662±77
[053]	112.16E,23.16N	TR-EF			5	NH4NO3		9	21	1927	3	581±26
[053]	112.16E,23.16N	TR-EF			10	NH4NO3		9	21	1927	3	507.8±14.4
[053]	112.16E,23.16N	TR-EF			0	NH4NO3		9	21	1927	3	671±9
[053]	112.16E,23.16N	TR-EF			15	NH4NO3		9	21	1927	3	594±82
[053]	112.16E,23.16N	TR-EF			0	NH4NO3		9	21	1927	3	485±21
[053]	112.16E,23.16N	TR-EF			5	NH4NO3		9	21	1927	3	462±12
[053]	112.16E,23.16N	TR-EF			10	NH4NO3		9	21	1927	3	531±116
[053]	112.16E,23.16N	TR-EF			0	NH4NO3		9	21	1927	3	488±18
[053]	112.16E,23.16N	TR-EF			15	NH4NO3		9	21	1927	3	418±33
[053]	112.16E,23.16N	TR-EF			0	NH4NO3		9	21	1927	3	645±50
[053]	112.16E,23.16N	TR-EF			5	NH4NO3		9	21	1927	3	656±47
[053]	112.16E,23.16N	TR-EF			10	NH4NO3		9	21	1927	3	484±23
[053]	112.16E,23.16N	TR-EF			0	NH4NO3		9	21	1927	3	651±49
[053]	112.16E,23.16N	TR-EF			15	NH4NO3		9	21	1927	3	538±90
[053]	112.16E,23.16N	TR-EF			0	NH4NO3		10	21	1927	3	709±48
[053]	112.16E,23.16N	TR-EF			5	NH4NO3		10	21	1927	3	661±23
[053]	112.16E,23.16N	TR-EF			10	NH4NO3		10	21	1927	3	639±74
[053]	112.16E,23.16N	TR-EF			0	NH4NO3		10	21	1927	3	844±76
[053]	112.16E,23.16N	TR-EF			15	NH4NO3		10	21	1927	3	575±24
[053]	112.16E,23.16N	TR-EF			0	NH4NO3		10	21	1927	3	552±60
[053]	112.16E,23.16N	TR-EF			5	NH4NO3		10	21	1927	3	460±91
[053]	112.16E,23.16N	TR-EF			10	NH4NO3		10	21	1927	3	548±56
[053]	112.16E,23.16N	TR-EF			0	NH4NO3		10	21	1927	3	552±61
[053]	112.16E,23.16N	TR-EF			15	NH4NO3		10	21	1927	3	496±83
[053]	112.16E,23.16N	TR-EF			0	NH4NO3		10	21	1927	3	566±74
[053]	112.16E,23.16N	TR-EF			5	NH4NO3		10	21	1927	3	586±66
[053]	112.16E,23.16N	TR-EF			10	NH4NO3		10	21	1927	3	436±25
[053]	112.16E,23.16N	TR-EF			0	NH4NO3		10	21	1927	3	568±80
[053]	112.16E,23.16N	TR-EF			15	NH4NO3		10	21	1927	3	522±39
[053]	112.16E,23.16N	TR-EF			0	NH4NO3		11	21	1927	3	768±33
[053]	112.16E,23.16N	TR-EF			5	NH4NO3		11	21	1927	3	665±21
[053]	112.16E,23.16N	TR-EF			10	NH4NO3		11	21	1927	3	628±41
[053]	112.16E,23.16N	TR-EF			0	NH4NO3		11	21	1927	3	695±110
[053]	112.16E,23.16N	TR-EF			5	NH4NO3		11	21	1927	3	513±18
[053]	112.16E,23.16N	TR-EF			10	NH4NO3		11	21	1927	3	630±50
[053]	112.16E,23.16N	TR-EF			0	NH4NO3		11	21	1927	3	649±56
[053]	112.16E,23.16N	TR-EF			5	NH4NO3		11	21	1927	3	537±30
[053]	112.16E,23.16N	TR-EF			10	NH4NO3		11	21	1927	3	451±19
[053]	112.16E,23.16N	TR-EF			0	NH4NO3		12	21	1927	3	739±15
[053]	112.16E,23.16N	TR-EF			5	NH4NO3		12	21	1927	3	570±22
[053]	112.16E,23.16N	TR-EF			10	NH4NO3		12	21	1927	3	581±66
[053]	112.16E,23.16N	TR-EF			0	NH4NO3		12	21	1927	3	830±24
[053]	112.16E,23.16N	TR-EF			15	NH4NO3		12	21	1927	3	580±67
[053]	112.16E,23.16N	TR-EF			0	NH4NO3		12	21	1927	3	692±110
[053]	112.16E,23.16N	TR-EF			5	NH4NO3		12	21	1927	3	506±47
[053]	112.16E,23.16N	TR-EF			10	NH4NO3		12	21	1927	3	487±26
[053]	112.16E,23.16N	TR-EF			0	NH4NO3		12	21	1927	3	728±30
[053]	112.16E,23.16N	TR-EF			15	NH4NO3		12	21	1927	3	552±57
[053]	112.16E,23.16N	TR-EF			0	NH4NO3		12	21	1927	3	602±26
[053]	112.16E,23.16N	TR-EF			5	NH4NO3		12	21	1927	3	422±41
[053]	112.16E,23.16N	TR-EF			10	NH4NO3		12	21	1927	3	428±35
[053]	112.16E,23.16N	TR-EF			0	NH4NO3		12	21	1927	3	623±41
[053]	112.16E,23.16N	TR-EF			15	NH4NO3		12	21	1927	3	398±60
[053]	112.16E,23.16N	TR-EF			0	NH4NO3		13	21	1927	3	801±18
[053]	112.16E,23.16N	TR-EF			5	NH4NO3		13	21	1927	3	636±56
[053]	112.16E,23.16N	TR-EF			10	NH4NO3		13	21	1927	3	585±11
[053]	112.16E,23.16N	TR-EF			0	NH4NO3		13	21	1927	3	825±53
[053]	112.16E,23.16N	TR-EF			15	NH4NO3		13	21	1927	3	652±38
[053]	112.16E,23.16N	TR-EF			0	NH4NO3		13	21	1927	3	693±38
[053]	112.16E,23.16N	TR-EF			5	NH4NO3		13	21	1927	3	584±5
[053]	112.16E,23.16N	TR-EF			10	NH4NO3		13	21	1927	3	568±30
[053]	112.16E,23.16N	TR-EF			0	NH4NO3		13	21	1927	3	692±43
[053]	112.16E,23.16N	TR-EF			15	NH4NO3		13	21	1927	3	491±39
[053]	112.16E,23.16N	TR-EF			0	NH4NO3		13	21	1927	3	674±40
[053]	112.16E,23.16N	TR-EF			5	NH4NO3		13	21	1927	3	556±32
[053]	112.16E,23.16N	TR-EF			10	NH4NO3		13	21	1927	3	447±16
[053]	112.16E,23.16N	TR-EF			0	NH4NO3		13	21	1927	3	685±36
[053]	112.16E,23.16N	TR-EF			15	NH4NO3		13	21	1927	3	481±50
[053]	112.16E,23.16N	TR-EF			0	NH4NO3		14	21	1927	3	855±48
[053]	112.16E,23.16N	TR-EF			5	NH4NO3		14	21	1927	3	819±33
[053]	112.16E,23.16N	TR-EF			10	NH4NO3		14	21	1927	3	684±33
[053]	112.16E,23.16N	TR-EF			0	NH4NO3		14	21	1927	3	934±55
[053]	112.16E,23.16N	TR-EF			15	NH4NO3		14	21	1927	3	726±31
[053]	112.16E,23.16N	TR-EF			0	NH4NO3		14	21	1927	3	762±28
[053]	112.16E,23.16N	TR-EF			5	NH4NO3		14	21	1927	3	738±78
[053]	112.16E,23.16N	TR-EF			10	NH4NO3		14	21	1927	3	541±51
[053]	112.16E,23.16N	TR-EF			0	NH4NO3		14	21	1927	3	770±24
[053]	112.16E,23.16N	TR-EF			15	NH4NO3		14	21	1927	3	622±41
[053]	112.16E,23.16N	TR-EF			0	NH4NO3		14	21	1927	3	675±39
[053]	112.16E,23.16N	TR-EF			5	NH4NO3		14	21	1927	3	594±42
[053]	112.16E,23.16N	TR-EF			10	NH4NO3		14	21	1927	3	503±16
[053]	112.16E,23.16N	TR-EF			0	NH4NO3		14	21	1927	3	698±13
[053]	112.16E,23.16N	TR-EF			15	NH4NO3		14	21	1927	3	530±54
[053]	112.16E,23.16N	TR-EF			0	NH4NO3		15	21	1927	3	1000±25
[053]	112.16E,23.16N	TR-EF			5	NH4NO3		15	21	1927	3	962±77
[053]	112.16E,23.16N	TR-EF			10	NH4NO3		15	21	1927	3	969±70
[053]	112.16E,23.16N	TR-EF			0	NH4NO3		15	21	1927	3	1243±102
[053]	112.16E,23.16N	TR-EF			15	NH4NO3		15	21	1927	3	1200±68
[053]	112.16E,23.16N	TR-EF			0	NH4NO3		15	21	1927	3	850±25
[053]	112.16E,23.16N	TR-EF			5	NH4NO3		15	21	1927	3	790±120
[053]	112.16E,23.16N	TR-EF			10	NH4NO3		15	21	1927	3	837±42
[053]	112.16E,23.16N	TR-EF			0	NH4NO3		15	21	1927	3	847±31
[053]	112.16E,23.16N	TR-EF			15	NH4NO3		15	21	1927	3	805±80
[053]	112.16E,23.16N	TR-EF			0	NH4NO3		15	21	1927	3	768±97
[053]	112.16E,23.16N	TR-EF			5	NH4NO3		15	21	1927	3	711±57
[053]	112.16E,23.16N	TR-EF			10	NH4NO3		15	21	1927	3	786±107
[053]	112.16E,23.16N	TR-EF			0	NH4NO3		15	21	1927	3	778±95
[053]	112.16E,23.16N	TR-EF			15	NH4NO3		15	21	1927	3	716±33
[053]	112.16E,23.16N	TR-EF			0	NH4NO3		16	21	1927	3	825.6±24
[053]	112.16E,23.16N	TR-EF			5	NH4NO3		16	21	1927	3	801.6±20
[053]	112.16E,23.16N	TR-EF			10	NH4NO3		16	21	1927	3	679.4±69
[053]	112.16E,23.16N	TR-EF			0	NH4NO3		16	21	1927	3	841.8±56.2
[053]	112.16E,23.16N	TR-EF			15	NH4NO3		16	21	1927	3	909±92
[053]	112.16E,23.16N	TR-EF			0	NH4NO3		16	21	1927	3	661.6±28.1
[053]	112.16E,23.16N	TR-EF			5	NH4NO3		16	21	1927	3	704.3±85.3
[053]	112.16E,23.16N	TR-EF			10	NH4NO3		16	21	1927	3	681.5±63.5
[053]	112.16E,23.16N	TR-EF			0	NH4NO3		16	21	1927	3	667±23.6
[053]	112.16E,23.16N	TR-EF			15	NH4NO3		16	21	1927	3	681.5±34.5
[053]	112.16E,23.16N	TR-EF			0	NH4NO3		16	21	1927	3	525.6±42.6
[053]	112.16E,23.16N	TR-EF			5	NH4NO3		16	21	1927	3	586.38±79.76
[053]	112.16E,23.16N	TR-EF			10	NH4NO3		16	21	1927	3	495.7±23
[053]	112.16E,23.16N	TR-EF			0	NH4NO3		16	21	1927	3	531.2±46.1
[053]	112.16E,23.16N	TR-EF			15	NH4NO3		16	21	1927	3	507.5±57
[054]	4.05W,40.85N	TE-CF	1.25		0	NH4NO3	4.46±0.06	3	10.4	648	4	32.8±3.8
[054]	4.05W,40.85N	TE-CF			1	NH4NO3	4.47±0.02	3	10.4	648	4	37.2±3.1
[054]	4.05W,40.85N	TE-CF			4	NH4NO3	4.27±0.068	3	10.4	648	4	35±3.2
[054]	4.05W,40.85N	TE-DF			0	NH4NO3	5.09±0.07	3	10.4	648	4	37±2.2
[054]	4.05W,40.85N	TE-DF			1	NH4NO3	4.99±0.06	3	10.4	648	4	39±1.8
[054]	4.05W,40.85N	TE-DF			4	NH4NO3	4.62±0.07	3	10.4	648	4	38±1.3
[055]	3.62W,40N	TE-DF	0.64		0	NH4NO3	8.15±0.07	8	15	358	6							2.74±0.15	0.14±0.01 (%)
[055]	3.62W,40N	TE-DF			1	NH4NO3	8.05±0.08	8	15	358	6							2.88±0.24	0.17±0.01
[055]	3.62W,40N	TE-DF			2	NH4NO3	8.18±0.07	8	15	358	6							2.73±0.15	0.16±0.01
[055]	3.62W,40N	TE-DF			5	NH4NO3	7.97±0.16	8	15	358	6							3.08±0.24	0.18±0.02
[056]	53.26E, 36.51N	subTR-DF	4		0	NH4NO3	7.13 ± 0.01	1	18	753	3	115 ± 3.00					47.65±0.7(g m-2)		0.36 ± 0.01(g 100g-1)
[056]	53.26E, 36.51N	subTR-DF			5	NH4NO3	7.08 ± 0.01	1	18	753	3	122 ± 7.3					47.875±0.46		0.41 ± 0.01
[056]	53.26E, 36.51N	subTR-DF			10	NH4NO3	6.86 ± 0.01	1	18	753	3	141 ± 10.7					48.8±0.46		0.47 ± 0.01
[056]	53.26E, 36.51N	subTR-DF			15	NH4NO3	6.76 ± 0.02	1	18	753	3	174 ± 16.1					51.6±0.68		0.58 ± 0.01
[057]	114.3E,34.81N	GLD			0	NH4NO3	8.66	8	14.5	619	6	2.67±0.04	2.12±0.08					4.77±0.18(g kg-1)											174.02±7.64(g m-2)
[057]	114.3E,34.81N	GLD			10	NH4NO3		8	14.5	619	6	3.15±0.07	2.3±0.04					5.18±0.18											221.29±4.56
[058]	101E,29.56N	TE-CF			0	NH4NO3		3	3.8	1940	5	1417.5±108.2
[058]	101E,29.56N	TE-CF			0.8	NH4NO3		3	3.8	1940	5	1408.7±86.2
[058]	101E,29.56N	TE-CF			4	NH4NO3		3	3.8	1940	5	1172.3±158.2
[059]	83.005E,24.3N	GLD			0		7.8(0.03)	3	25.5	969	12	169±7			27.68±1.91	11.81±0.65	29.63±0.53	17.26±1.05		445±13	52±3				7.64±0.58	78.84±0.67	12.26±0.51
[059]	83.005E,24.3N	GLD			3		7.84(0.06)-7.37(0.04)	3	25.5	969	12	171 (6)-186(8)			27.75±1.93	11.49±0.62	30.29(0.48)-35.1(0.31)	17.32 (1.24)-17.30 (1.41)		440 (14)- 479 (16)	52 (5)- 75 (2.90)				8.40±0.34	78.47±0.53	12.06±0.5
[059]	83.005E,24.3N	GLD			6		7.81(0.03)-7.15(0.02)	3	25.5	969	12	169(9)-189(7)			28.11±1.72	11.51±0.63	31.06(0.26)-38.52(0.31)	17.19 (1.16)- 23.08 (1.47)		446 (16) - 524 (17)	53 (3) - 83 (4)				8.38±0.55	77.51±0.56	12.64±0.54
[059]	83.005E,24.3N	GLD			9		7.83(0.05)-6.92(0.03)	3	25.5	969	12	168(9)-197(8)			27.96±2.11	11.6±0.65	29.86(0.44)-47.13(0.74)	17.31 (1.88) - 23.75b (1.87)		448 (19)- 545 (16)	51 (6)-89 (3)				7.91±0.4	78.33±0.53	13.17±0.47
[059]	83.005E,24.3N	GLD			12		7.79(0.02)-6.68(0.03)	3	25.5	969	12	170(7)-177(8)			28.21±1.79	11.17±0.58	30.42(0.31)-42.57(0.29)	17.26 (1.16)-18.86 (1.11)		440 (12)- 465 (14)	50 (4) - 54 (3)				8.66±0.23	77.06±0.77	12.5±0.4
[059]	83.005E,24.3N	GLD			15		7.82(0.06)-6.22(0.03)	3	25.5	969	12	169(6)-156(5)			28.23±1.69	11.08±0.53	29.81(0.45)-37.5(0.33)	17.30 (1.41)- 16.75 (1.25)		447 (11)- 415 (13)	52 (5)-46(2)				8.13±52	76.84±0.6	12.8±0.51
[060]	121.5E,50.93N	BF-CF	0.55		0	NH4NO3		9	-5.4	500	3	4.8±0.36								2752.9±632.19(mg kg-1)
[060]	121.5E,50.93N	BF-CF			2	NH4NO3		9	-5.4	500	3	4.34±0.18								2900.98±450.49
[060]	121.5E,50.93N	BF-CF			5	NH4NO3		9	-5.4	500	3	4.04±0.17								2734.78±298.27
[060]	121.5E,50.93N	BF-CF			10	NH4NO3		9	-5.4	500	3	3.95±0.27								1802.03±279.92
[061]	103E,30.1N	subTR-DF			0	NH4NO3	4.29±0.02	2	17.9	1719	3	2.5±0.25					522.1±27.4(mg m-2)			235.02±11.26(mg kg-1)
[061]	103E,30.1N	subTR-DF			10	NH4NO3	4.06±0.03	2	17.9	1719	3	2.2±0.2					431.7±25.4			180.95±9.39
[062]	116.6E,43.55N	GLD			0	NH4NO3	7.95±0.07	1	1	341	3	302±7					1576±50(g m-2)			457±17(mg kg-1)
[062]	116.6E,43.55N	GLD			2.5	NH4NO3		1	1	341	3	327±12					1587±40			462±15
[062]	116.6E,43.55N	GLD			5	NH4NO3		1	1	341	3	310±10					1568±33			454±13
[062]	116.6E,43.55N	GLD			10	NH4NO3		1	1	341	3	317±12					1621±20			472±15
[062]	116.6E,43.55N	GLD			0	NH4NO3		1	1	341	3	339±11					1650±33			480±12
[062]	116.6E,43.55N	GLD			2.5	NH4NO3		1	1	341	3	373±15					1763±33			520±11
[062]	116.6E,43.55N	GLD			5	NH4NO3		1	1	341	3	352±9					1693±62			498±10
[062]	116.6E,43.55N	GLD			10	NH4NO3		1	1	341	3	354±13					1663±25			498±14
[062]	116.6E,43.55N	GLD			0	NH4NO3		2	1	341	3	234±11					1920±88			447±12
[062]	116.6E,43.55N	GLD			2.5	NH4NO3		2	1	341	3	248±15					1900±74			478±19
[062]	116.6E,43.55N	GLD			5	NH4NO3		2	1	341	3	233±10					1994±68			455±10
[062]	116.6E,43.55N	GLD			10	NH4NO3		2	1	341	3	230±26					1961±55			465±17
[062]	116.6E,43.55N	GLD			0	NH4NO3		2	1	341	3	256±5					1931±48			488±14
[062]	116.6E,43.55N	GLD			2.5	NH4NO3		2	1	341	3	293±16					1980±40			510±16
[062]	116.6E,43.55N	GLD			5	NH4NO3		2	1	341	3	271±10					1946±21			505±16
[062]	116.6E,43.55N	GLD			10	NH4NO3		2	1	341	3	261±121					1967±120			493±17
[062]	116.6E,43.55N	GLD			0	NH4NO3		3	1	341	3	164±9					1767±40			421±15
[062]	116.6E,43.55N	GLD			2.5	NH4NO3		3	1	341	3	164±6					1807±63			469±15
[062]	116.6E,43.55N	GLD			5	NH4NO3		3	1	341	3	156±6					2012±125			436±20
[062]	116.6E,43.55N	GLD			10	NH4NO3		3	1	341	3	158±14					2158±37			411±11
[062]	116.6E,43.55N	GLD			0	NH4NO3		3	1	341	3	187±10					1876±107			478±19
[062]	116.6E,43.55N	GLD			2.5	NH4NO3		3	1	341	3	200±13					2045±99			465±23
[062]	116.6E,43.55N	GLD			5	NH4NO3		3	1	341	3	188±6					2092±37			474±19
[062]	116.6E,43.55N	GLD			10	NH4NO3		3	1	341	3	175±14					1987±38			440±15
[062]	116.6E,43.55N	GLD			0	NH4NO3		4	1	341	3	68.3±4					1912±28			323.7±13
[062]	116.6E,43.55N	GLD			2.5	NH4NO3		4	1	341	3	62.5±8					2073.8±143			280±11
[062]	116.6E,43.55N	GLD			5	NH4NO3		4	1	341	3	78.2±5					2226±73			287±11
[062]	116.6E,43.55N	GLD			10	NH4NO3		4	1	341	3	72.3±5					2263.7±96			253.6±14
[062]	116.6E,43.55N	GLD			0	NH4NO3		4	1	341	3	84.2±4.3					2045.5±35.8			333.6±15
[062]	116.6E,43.55N	GLD			2.5	NH4NO3		4	1	341	3	79.6±4					2339±165			343±8.5
[062]	116.6E,43.55N	GLD			5	NH4NO3		4	1	341	3	84±6					2318±75			362±10.8
[062]	116.6E,43.55N	GLD			10	NH4NO3		4	1	341	3	70.5±4					2246.8±39.5			331±12
[063]	123.75E,44.75N	GLD			0	NH4NO3		3	6.4	430	4	2.95±0.06	1.8±0.1	1.15±0.05
[063]	123.75E,44.75N	GLD			10	NH4NO3		3	6.4	430	4	3.15±0.21	1.85±0.12	1.3±0.1
[063]	123.75E,44.75N	GLD			0	NH4NO3		3	6.4	430	4	2.62±0.2	1.7±0.1	0.92±0.08
[063]	123.75E,44.75N	GLD			10	NH4NO3		3	6.4	430	4	2.94±0.2	1.9±0.1	1.04±0.08
[064]	116.3E,42N	GLD			0	NH4NO3		1	2.4	382	6	1.7±0.1
[064]	116.3E,42N	GLD			10	NH4NO3		1	2.4	382	6	1.74±0.05
[065]	103E,30N	subTR-DF			0	NH4NO3	3.9±0.03	1	13.9	1750	4	8.08±0.52							9.5±0.7(g kg-1)	0.32±0.06(mg kg-1)	0.077±0.01
[065]	103E,30N	subTR-DF			5	NH4NO3	3.86±0.04	1	13.9	1750	4	5.72±0.25							9.8±0.2	0.33±0.03	0.089±0.02
[065]	103E,30N	subTR-DF			15	NH4NO3	3.71±0.03	1	13.9	1750	4	7.1±0.2							9.7±0.6	0.29±0.03	0.063±0
[065]	103E,30N	subTR-DF			0	NH4NO3		2	13.9	1750	4	11.16±0.78
[065]	103E,30N	subTR-DF			5	NH4NO3		2	13.9	1750	4	7.87±0.68
[065]	103E,30N	subTR-DF			15	NH4NO3		2	13.9	1750	4	9.36±0.52
[065]	103E,30N	subTR-DF			0	NH4NO3		3	13.9	1750	4	12.1±0.8
[065]	103E,30N	subTR-DF			5	NH4NO3		3	13.9	1750	4	9.12±0.6
[065]	103E,30N	subTR-DF			15	NH4NO3		3	13.9	1750	4	9.72±1
[066]	109.25E,36.75N	GLD		20.9-71.3(mg kg-1)	0	NH4NO3	8.6	2	8.8	528	3	2521±109.53	1461	1060				13.7 ± 0.44	1.17 ± 0.03 (g kg-1)	34.3 ± 0.61(mg kg-1)	2.36 ± 0.30	245 ± 10.1(g m-2)	262 ± 4.4
[066]	109.25E,36.75N	GLD			5	NH4NO3		2	8.8	528	3	3161±86	1675	1486				11.0 ± 0.30	1.02 ± 0.04	36.0 ± 0.65	2.56 ± 0.11	252 ± 3.0	360 ± 8.6
[066]	109.25E,36.75N	GLD			10	NH4NO3		2	8.8	528	3	3196±113	1646.6	1549.4				11.9 ± 0.06	1.03 ± 0.02	49.0 ± 1.36	3.67 ± 0.42	368 ± 10.1	373 ± 6.8
[067]	19.8E,64.22N	B-CF	0.2		0	NH4NO3	3.3±0.06	13	1	600	6	1.4	0.5	0.9
[067]	19.8E,64.22N	B-CF	0.2		0.3	NH4NO3	3.2±0.04	13	1	600	6	1.5036	0.6135	0.8901
[067]	19.8E,64.22N	B-CF	0.2		0.6	NH4NO3	3.3±0.03	13	1	600	6	1.4798	0.5225	0.9573
[067]	19.8E,64.22N	B-CF	0.2		1.2	NH4NO3	3.2±0.03	13	1	600	6	1.4	0.5785	0.8215
[067]	19.8E,64.22N	B-CF	0.2		5	NH4NO3	3.1±0.04	13	1	600	6	1.2852	0.61	0.6752
[068]	40N,3.5W	Shrublands	3		0	NH4NO3	8.08±0.08	8	15.5	494	6	1.38±0.06						3.07±0.18(%)	2.2±0.16(mg/g)		120.78±74.51(ug/g)
[068]	40N,3.5W	Shrublands	3		1	NH4NO3	7.91±0.11	8	15.5	494	6	1.03±0.04						2.7±0.18	1.68±0.13		103.73±47.62
[068]	40N,3.5W	Shrublands	3		2	NH4NO3	7.87±0.12	8	15.5	494	6	1.11±0.07						2.62±0.16	1.90±0.13		120.31±63.73
[068]	40N,3.5W	Shrublands	3		5	NH4NO3	7.76±0.13	8	15.5	494	6	1.18±0.1						2.97±0.17	2.29±0.15		98.07±69.76
[068]	8.15E,40.6N	Shrublands	3		0	NH4NO3	7.35±0.14	3	16.8	356	4	2.1±0.07						4.07±0.24	1.77±0.09		167.29±54.03
[068]	8.15E,40.6N	Shrublands	3		3	NH4NO3	7.5±0.14	3	16.8	356	4	2.37±0.11						4.94±0.2	2.07±0.16		187.84±66.96
[068]	3.6W,40N	TE-DF			0	NH4NO3	8.08±0.08	8	20.8	356	6	1.42±0.06						3.07±0.18	2.20±0.16		120.78±74.51
[068]	3.6W,40N	TE-DF			1	NH4NO3	7.91±0.11	8	20.8	356	6	1.05±0.04						2.70±0.18	1.68±0.13		109.73±47.62
[068]	3.6W,40N	TE-DF			2	NH4NO3	7.87±0.12	8	20.8	356	6	1.14±0.07						2.62±0.16	1.90±0.13		120.31±63.73
[068]	3.6W,40N	TE-DF			5	NH4NO3	7.76±0.13	8	20.8	356	6	1.21±0.1						2.97±0.17	2.29±0.15		98.07±69.76
[069]	93.1994W, 45.4020N	GLD	0.9		0	CH₄N₂O	5.41±0.16	13	6	750	5	5.41±0.32	0.9±0.21					2.25±0.7(SC, gcm-3)		0.29±0.03(mg/g)		186.27±68.2	491.3±176.27		88				52.67±20.48
[069]	93.1994W, 45.4020N	GLD	0.9		1	CH₄N₂O	5.42±0.23	13	6	750	5	8.53±2.05	0.86±0.25					2.38±0.9		0.24±0.01		361±3.4	451.37±145						88.04±33.2
[069]	93.1994W, 45.4020N	GLD	0.9		5	CH₄N₂O	5.23±0.16	13	6	750	5	6.57±2.03	0.62±0.12					2.2±0.57		0.24±0.03		274.76±91.41	289.46±130.44						83.4±33.2
[069]	93.1994W, 45.4020N	GLD	0.9		10	CH₄N₂O	4.93±0.27	13	6	750	5	4.37±0.76	0.52±0.1					3.11±1.32		0.22±0.02		208.18±102.46	305.54±63.46						73.6±9.63
[070]	19.75E, 64.17N	B-CF	0.5		0	NH4NO3		6	1.2	520	3		48.74±4.82	39.01±3.95			94.24±19.63(g m-2)	45.77±1.59(%)	1.18±0.04(%)
[070]	19.75E, 64.17N	B-CF	0.5		2	NH4NO3		6	1.2	520	3		61.45±5.86	74.81±6.16			117.78±14.61	48.65±1.59	1.19±0.04
[070]	19.75E, 64.17N	B-CF	0.5		10	NH4NO3		6	1.2	520	3		54.73±4.39	29.60±3.2			115.23±17.35	50.19±1.59	1.26±0.04
[071]	85.4W, 42.4N	TE-DF	0.6		0	NH4NO3		2	9.7	890	3	262±18				14.7±1			5.9±0.6(IN)
[071]	85.4W, 42.4N	TE-DF	0.6		1	NH4NO3		2	9.7	890	3	293±14				13.9±1.6			5.7±1
[071]	85.4W, 42.4N	TE-DF	0.6		0	NH4NO3		2	9.7	890	3	331±29				14.6±0.9			7.5±0.5
[071]	85.4W, 42.4N	TE-DF	0.6		1	NH4NO3		2	9.7	890	3	319±29				11.7±1			7.2±0.8
[071]	85.4W, 42.4N	TE-DF	0.6		3	NH4NO3		2	9.7	890	3	321±19				10.7±1.4			8.3±0.5
[071]	85.4W, 42.4N	TE-DF	0.6		0	NH4NO3		2	9.7	890	3	326±46				17.8±0.3			6.0±0.8
[071]	85.4W, 42.4N	TE-DF	0.6		1	NH4NO3		2	9.7	890	3	318±36				17.1±2			7.2±1
[071]	85.4W, 42.4N	TE-DF	0.6		0	NH4NO3		2	9.7	890	3	295±26				15.4±0.8			5.7±0.4
[071]	85.4W, 42.4N	TE-DF	0.6		1	NH4NO3		2	9.7	890	3	298±12				15±0.5			6.1±0.2
[071]	85.4W, 42.4N	TE-DF	0.6		3	NH4NO3		2	9.7	890	3	313±14				12.5±0.5			8.3±0.3
[071]	85.4W, 42.4N	TE-DF	0.6		0	NH4NO3		2	9.7	890	3	501±36				15±1.4			4±0.9
[071]	85.4W, 42.4N	TE-DF	0.6		1	NH4NO3		2	9.7	890	3	425±25				14.1±1.5			4.3±0.7
[072]	121W,39N	TE-CF			0	NH4Cl		3	18	1000	2	1.863±1.285					9.6±3.3		900(ug/g)
[072]	121W,39N	TE-CF			10	NH4Cl		3	18	1000	2	6.536±1.817					11.1±0.6
[072]	121W,39N	TE-CF			20	NH4Cl		3	18	1000	2	3.235±1.817					12.2±0.1
[073]	19.75E,64.35N	B-CF	0.4		0	mixed N		20	1.2	595	6	142.77±7.58					283.7±36.3(Kg ha-1)
[073]	19.75E,64.35N	B-CF	0.4		6	mixed N		20	1.2	595	6	110.07±1.03					297±16.5
[073]	19.75E,64.35N	B-CF	0.4		12	mixed N		20	1.2	595	6	98.28±4.7					267.25±16.44
[074]	81.13W,33.92N	TE-DF			0	NH4NO3		1			3	0.026±0.011
[074]	81.13W,33.92N	TE-DF			1.5	NH4NO3		1			3	0.023±0.007
[074]	81.13W,33.92N	TE-DF			3	NH4NO3		1			3	0.012±0.006
[074]	81.13W,33.92N	TE-DF			0	NH4NO3		1			3	0.4±0.07
[074]	81.13W,33.92N	TE-DF			1.5	NH4NO3		1			3	0.44±0.16
[074]	81.13W,33.92N	TE-DF			3	NH4NO3		1			3	0.35±0.09
[074]	81.13W,33.92N	TE-DF			0	NH4NO3		1			3	0.35±0.13
[074]	81.13W,33.92N	TE-DF			1.5	NH4NO3		1			3	0.44±0.15
[074]	81.13W,33.92N	TE-DF			3	NH4NO3		1			3	0.48±0.11
[074]	81.13W,33.92N	TE-DF			0	NH4NO3		1			3	0.33±0.05
[074]	81.13W,33.92N	TE-DF			1.5	NH4NO3		1			3	0.48±0.1
[074]	81.13W,33.92N	TE-DF			3	NH4NO3		1			3	0.64±0.34
[075]	16.87E,60.05N	B-CF			0	NH4NO3		1			3	187±9						0.39±0.034(Kg m-2)		23.7±0.98(ug g-1)
[075]	16.87E,60.05N	B-CF			15	NH4NO3		1			3	187±9						0.46±0.034		22.7±0.98
[075]	16.87E,60.05N	B-CF			60	NH4NO3		1			3	143±9						0.5±0.034		18.9±0.98
[075]	13.63E,57.4N	B-CF			0	NH4NO3		7			6	0.11±0.05						3.2±0.11		23.87±0.5
[075]	13.63E,57.4N	B-CF			15	NH4NO3		7			6	0.11±0.05						3.5±0.11		23.27±0.5
[076]	119.56W,36.89N	TE-CF			0	NH4		2			3	1.4±0.5						6689±296(g m-2)
[076]	119.56W,36.89N	TE-CF			10	NH4		2			3	3.4±1.4						6612±560
[076]	119.56W,36.89N	TE-CF			20	NH4		2			3	1.8±0.8						6539±429
[077]	14.77E, 49.02N	GLD			0	Other		2	8.52	603.26	4	1.93±0.31						335±36(ug/g)	18.7±6.4	2096±402(ug/g)	171±64.3(ug/g)							735.66±210.69	417.68±139.67
[077]	14.77E, 49.02N	GLD			0.9	Other		2	8.52	603.26	4	2.02±0.34						369±54.2	21.5±9.1	2194±486	190±91.6							773.53±103.29	392.15±139.67
[077]	14.77E, 49.02N	GLD			4.5	Other		2	8.52	603.26	4	1.89±0.32						411±65.5	19.3±11.1	1993±354	193±70.5							817.41±171.96	290±164.39
[077]	14.77E, 49.02N	GLD			0	Other		2	8.52	603.26	4	1.2±0.24						162±21.8	18.7±14	1795±277	174±56.6							1033.83±266.7	287.83±88.23
[077]	14.77E, 49.02N	GLD			0.9	Other		2	8.52	603.26	4	1.1±0.3						161±39.3	15.9±9.3	1520±265	157±48.5							886.26±117.71	327.22±93.37
[077]	14.77E, 49.02N	GLD			4.5	Other		2	8.52	603.26	4	1.26±0.29						179±48.9	21.4±15.8	1692±232	177±73.9							1202.22±201.65	282.42±147.05
[078]	88.88W, 46.87N	B-DF			0	NO3		1	4.8	821	3	2.02±0.34
[078]	88.88W, 46.87N	B-DF			3	NO3		1	4.8	821	3	2.14±0.154
[078]	88.88W, 46.87N	B-DF			0	NO3		5	4.8	821	3	7.47±0.53
[078]	88.88W, 46.87N	B-DF			3	NO3		5	4.8	821	3	6.19±0.54
[078]	88.88W, 46.87N	B-DF			0	NO3		8	4.8	821	3	4.27±0.39
[078]	88.88W, 46.87N	B-DF			3	NO3		8	4.8	821	3	4.06±0.42
[078]	84.85W, 45.55N	TE-DF			0	NO3		1	6.1	828	3	1.65±0.13
[078]	84.85W, 45.55N	TE-DF			3	NO3		1	6.1	828	3	1.92±0.1
[078]	84.85W, 45.55N	TE-DF			0	NO3		5	6.1	828	3	6.12±0.26
[078]	84.85W, 45.55N	TE-DF			3	NO3		5	6.1	828	3	5.76±0.31
[078]	84.85W, 45.55N	TE-DF			0	NO3		8	6.1	828	3	4.77±0.47
[078]	84.85W, 45.55N	TE-DF			3	NO3		8	6.1	828	3	4.29±0.48
[078]	85.83W,44.38N	TE-DF			0	NO3		1	6.9	856	3	1.73±0.17
[078]	85.83W,44.38N	TE-DF			3	NO3		1	6.9	856	3	1.82±0.17
[078]	85.83W,44.38N	TE-DF			0	NO3		5	6.9	856	3	6.77±0.48
[078]	85.83W,44.38N	TE-DF			3	NO3		5	6.9	856	3	5.17±0.37
[078]	85.83W,44.38N	TE-DF			0	NO3		8	6.9	856	3	4.74±0.39
[078]	85.83W,44.38N	TE-DF			3	NO3		8	6.9	856	3	3.35±0.25
[078]	86.15W,43.67N	TE-DF			0	NO3		1	7.6	793	3	1.79±0.19
[078]	86.15W,43.67N	TE-DF			3	NO3		1	7.6	793	3	1.86±0.19
[078]	86.15W,43.67N	TE-DF			0	NO3		5	7.6	793	3	8.09±0.68
[078]	86.15W,43.67N	TE-DF			3	NO3		5	7.6	793	3	7.29±0.59
[078]	86.15W,43.67N	TE-DF			0	NO3		8	7.6	793	3	5.73±0.34
[078]	86.15W,43.67N	TE-DF			3	NO3		8	7.6	793	3	4.73±0.38
[079]	83.61W,8.71N	TR-EF			0	NH4NO3		2	26.2244	435.8	10	1880					194.32±71.81
[079]	83.61W,8.71N	TR-EF			15	NH4NO3		2	26.2244	435.8	10	2139					302±97
[080]	148.3W, 64.75N	B-CF			0	NH4NO3		5	12.3	52.5	4	3.46±0.33
[080]	148.3W, 64.75N	B-CF			2.33	NH4NO3		5	12.3	52.5	4	2.56±0.23
[080]	148.3W, 64.75N	B-CF			0	NH4NO3		5	12.3	52.5	4	1.6±0.09
[080]	148.3W, 64.75N	B-CF			1.48	NH4NO3		5	12.3	52.5	4	1.37±0.14
[080]	148.3W, 64.75N	B-CF			0	NH4NO3		5	12.3	52.5	4	2.1±0.1
[080]	148.3W, 64.75N	B-CF			6	NH4NO3		5	12.3	52.5	4	2.36±0.15
[080]	148.3W, 64.75N	B-CF			0	NH4NO3		5	12.3	52.5	4	1.33±0.11
[080]	148.3W, 64.75N	B-CF			5	NH4NO3		5	12.3	52.5	4	1.56±0.15
[081]	72.3W, 42.83N	TE-DF	0.66		0	NH4NO3		1	7	1100	6	409±38
[081]	72.3W, 42.83N	TE-DF	0.66		5	NH4NO3		1	7	1100	6	466±17
[081]	72.3W, 42.83N	TE-DF	0.66		0	NH4NO3		2	7	1100	6	475±28
[081]	72.3W, 42.83N	TE-DF	0.66		5	NH4NO3		2	7	1100	6	588±22
[082]	3.2E, 55.87N	GLD			0	NH4NO3		1	7.18	849	3	7004±385
[082]	3.2E, 55.87N	GLD			30	NH4NO3		1	7.18	849	3	6762±625
[082]	3.2E, 55.87N	GLD			0	NH4NO3		2	7.18	849	3	9183±73
[082]	3.2E, 55.87N	GLD			30	NH4NO3		2	7.18	849	3	9432±579
[082]	3.2E, 55.87N	GLD			0	NH4NO3		3	7.18	849	3	5636±480
[082]	3.2E, 55.87N	GLD			30	NH4NO3		3	7.18	849	3	6470±527
[083]	25.12E,61.32N	B-CF			0	NH+//NO3-		4	3.3	680	3	611±13
[083]	25.12E,61.32N	B-CF			20	NH+//NO3-		4	3.3	680	3	533±28
[084]	79.1W,35.97N	TE-DF			0	NH4NO3		1	14.965	1164	4	1268±232												301				910
[084]	79.1W,35.97N	TE-DF			11.2	NH4NO3		1	14.965	1164	4	993±167												344				1070
[085]	74.25W, 42.12N	TE-DF	0.9		0			14	4.3	1530	6
[085]	74.25W, 42.12N	TE-DF	0.9		5	NH4NO3		14	4.3	1530	6
[086]	93.23W,45.38N	GLD			0	NH4NO3		8	5.5	660	3	100(%)													94.4	2.5		100(%)
[086]	93.23W,45.38N	GLD			4	NH4NO3		8	5.5	660	3	103.7																116.2(%)
[086]	93.23W,45.38N	GLD			0	NH4NO3		2	5.5	660	74	4.46
[086]	93.23W,45.38N	GLD			4	NH4NO3		2	5.5	660	74	4.83
[087]	14.44W, 47.84N	B-CF	1.7		0	NH4NO3		6	7.2	1650	5	16.8±2.85
[087]	14.44W, 47.84N	B-CF	1.7		9	NH4NO3		6	7.2	1650	5	14.25±2.7
[088]	13.26E, 50.59N	B-CF	0.97		0	NH4NO3	4.27±0.027	4	6.3	1000	4	3.61±0.173
[088]	13.26E, 50.59N	B-CF	0.97		5	NH4NO3	4.18±0.025	4	6.3	1000	4	3.54±0.276
[088]	13.26E, 50.59N	B-CF	0.97		0	NH4NO3	4.27±0.068	5	6.3	1000	4	2.66±0.085
[088]	13.26E, 50.59N	B-CF	0.97		5	NH4NO3	4.13±0.1	5	6.3	1000	4	2.62±0.088
[088]	13.26E, 50.59N	B-CF	0.97		0	NH4NO3	4.17±0.1	6	6.3	1000	4	3.06±0.156
[088]	13.26E, 50.59N	B-CF	0.97		5	NH4NO3	3.92±0.084	6	6.3	1000	4	2.99±0.269
[088]	13.26E, 50.59N	B-CF	0.97		0	NH4NO3	3.8±0.053	4	6.3	1000	4	3.27±0.136
[088]	13.26E, 50.59N	B-CF	0.97		5	NH4NO3	3.68±0.029	4	6.3	1000	4	3.37±0.041
[088]	13.26E, 50.59N	B-CF	0.97		0	NH4NO3	3.72±0.007	5	6.3	1000	4	3.12±0.095
[088]	13.26E, 50.59N	B-CF	0.97		5	NH4NO3	3.75±0.023	5	6.3	1000	4	3.2±0.047
[088]	13.26E, 50.59N	B-CF	0.97		0	NH4NO3	3.75±0.058	6	6.3	1000	4	3.65±0.22
[088]	13.26E, 50.59N	B-CF	0.97		5	NH4NO3	3.52±0.069	6	6.3	1000	4	3.82±0.112
[089]	128.1E,42.6N	mixed forest	2.3		0	NH4NO3		2	3.6	740	3	969.34±14.55
[089]	128.1E,42.6N	mixed forest	2.3		5	NH4NO3		2	3.6	740	3	1280.52±14.79
[089]	128.1E,42.6N	mixed forest	2.3		0	NH4NO3		2	3.6	740	3	873.75±25.69
[089]	128.1E,42.6N	mixed forest	2.3		5	NH4NO3		2	3.6	740	3	1160.68±26.08
[090]	119.69E, 48.93N	GLD			0	NH4NO3	7.19±0.06	1	-0.1	325	3	3.74±0.09	2.18±0.03	1.56±0.09				13.26±0.78	1.16±0.11(gkg-1)	427.92±17.49(mg kg-1)	88.96±11.01	414.37±32.96	1044.6±177.14	208.46±45.43
[090]	119.69E, 48.93N	GLD			2	NH4NO3	6.74±0.04	1	-0.1	325	3	4.03±0.2	2.25±0.16	1.78±0.04				14.65±1.11	1.35±0.15	626.89±40.64	73.84±11.24	414.7±5.48	1334.45±217.18	186.75±25.96
[090]	119.69E, 48.93N	GLD			5	NH4NO3	6.74±0.09	1	-0.1	325	3	4.24±0.144	2.23±0.15	2.01±0.21				14.24±0.29	1.41±0.1	846.5±65.9	83.58±11.24	464.12±10.94	1382.55±182.86	178.16±22.24
[090]	119.69E, 48.93N	GLD			10	NH4NO3	6.73±0.06	1	-0.1	325	3	4.09±0.1	2.1±0.11	1.99±0.09				14.75±1.17	1.24±0.06	563.63±77.78	62.23±7.95	497.77±92.11	1315.6±22.51	174.15±15.15
[091]	97.3E, 33.41N	GLD	0.8		0	NH4NO3	7.24±0.36	1	-0.9	562.2	4	3.54±0.19	1.23±0.18	1.62±0.03				31.8±0.3(g kg-1)	3.88±0.15(g kg-1)			256.5±36.55(g m-2)	3368±393.58
[091]	97.3E, 33.41N	GLD	0.8		1.6	NH4NO3	7.12±0.32	1	-0.9	562.2	4	3.56±0.18	1.19±0.14	1.69±0.15				32.17±0.7	4.1±0.85			260.97±24.98	3491.68±1109.18
[091]	97.3E, 33.41N	GLD	0.8		3.2	NH4NO3	7.43±0.18	1	-0.9	562.2	4	3.67±0.29	1.16±0.13	1.84±0.22				38.67±0.73	5.04±0.6			309.89±19.72	3503.61±298.17
[092]	104.9E, 18.5N	TE-DF			0	NH4NO3	4.55±0.07	1	16	1600	4	2.74±0.22	1.32±0.1	1.42±0.14	19.42±0.97	45.01±1.02	2.44±0.07(t ha-1)	63.15±2.65(g kg-1)	10.88±0.58(g kg-1)
[092]	104.9E, 18.5N	TE-DF			10	NH4NO3	4.46±0.06	1	16	1600	4	2.71±0.225	0.98±0.06	1.73±0.15	19.21±0.98	47.27±1.25	1.88±0.18	71.85±4.15	12.78±0.5
[093]	21.89E, 24,17S	GLD			0	NO3		2	21.376	365	4	2.54±1.48
[093]	21.89E, 24,17S	GLD			13.3	NO3		2	21.376	365	4	0.96±0.29
[093]	21.81E, 21,65S	GLD			0	NO3		2	22.36	400	4	3.33±1.4
[093]	21.81E, 21,65S	GLD			13.3	NO3		2	22.36	400	4	7.39±1.05
[093]	25.5E, 18.66S	GLD			0	NO3		2	23.527	698	4	8.1±3.19
[093]	25.5E, 18.66S	GLD			13.3	NO3		2	23.527	698	4	12.26±2.85
[093]	23.25E, 15.44S	GLD			0	NO3		2	22.261	879	4	2.88±0.61
[093]	23.25E, 15.44S	GLD			13.3	NO3		2	22.261	879	4	2.04±0.73
[094]	89.67W, 46.17N	B-CF			0	NH4NO3		2	4.55	586	3	541±30	430±40				251±39							146±3
[094]	89.67W, 46.17N	B-CF			15	NH4NO3		2	4.55	586	3	478±17	461±26				94±26							162±3
[094]	89.67W, 46.17N	B-CF			0	NH4NO3		3	4.55	586	3	483±20	336±39				180±32							151±3
[094]	89.67W, 46.17N	B-CF			15	NH4NO3		3	4.55	586	3	374±7	331±17				194±32							187±4
[094]	89.67W, 46.17N	B-CF			0	NH4NO3		4	4.55	586	3	505±20	395±56											110±2
[094]	89.67W, 46.17N	B-CF			15	NH4NO3		4	4.55	586	3	404±6	379±17											164±12
[095]	11.43E,50.99N	B-CF	3.5		0	NH4		7	8.773	613	3	3.2±0.3
[095]	11.43E,50.99N	B-CF	3.5		14	NH4		7	8.773	613	3	3.8±1
[096]	116.7E,43.63N	GLD	1.45		0	NH4NO3		12	0.9	334	9	5.74±0.056	4.51±0.063
[096]	116.7E,43.63N	GLD	1.45		1.75	NH4NO3		12	0.9	334	9	5.5±0.127	4.257±0.09
[096]	116.7E,43.63N	GLD	1.45		5.25	NH4NO3		12	0.9	334	9	5.33±0.086	4.074±0.09
[096]	116.7E,43.63N	GLD	1.45		10.5	NH4NO3		12	0.9	334	9	5.063±0.106	3.762±0.07
[096]	116.7E,43.63N	GLD	1.45		17.5	NH4NO3		12	0.9	334	9	5.033±0.136	3.63±0.13
[096]	116.7E,43.63N	GLD	1.45		28	NH4NO3		3	0.9	334	9	4.94±0.116	3.499±0.105
[097]	112.1E, 36.1N	TE-DF			0	NH4NO3	6.55±0.23	2	11	600	4	2.19±0.09						19.18±3.11(g kg-1)	1.35±0.2	342.39±31.16(g kg-1)
[097]	112.1E, 36.1N	TE-DF			5	NH4NO3	6.6±0.21	2	11	600	4	1.99±0.07						18.2±2.1	1.36±0.13	251.58±10.64
[097]	112.1E, 36.1N	TE-DF			10	NH4NO3	6.51±0.18	2	11	600	4	1.78±0.07						18.76±2.27	1.44±0.14	275.23±12.46
[097]	112.1E, 36.1N	TE-DF			20	NH4NO3	6.48±0.28	2	11	600	4	1.8±0.11						16.7±1.04	1.27±0.08	273.07±16.98
[097]	112.1E, 36.1N	TE-DF			40	NH4NO3	6.53±0.25	2	11	600	4	1.74±0.13						16.65±0.58	1.37±0.03	247.9±19.07
[098]	112.459E, 39.987N	GLD			0	NH4NO3		1	4.7	435	6	3.09±0.44
[098]	112.459E, 39.987N	GLD			1	NH4NO3		1	4.7	435	6	2.78±0.4
[098]	112.459E, 39.987N	GLD			2	NH4NO3		1	4.7	435	6	3.02±0.43
[098]	112.459E, 39.987N	GLD			4	NH4NO3		1	4.7	435	6	3.06±0.43
[098]	112.459E, 39.987N	GLD			8	NH4NO3		1	4.7	435	6	3.22±0.34
[098]	112.459E, 39.987N	GLD			16	NH4NO3		1	4.7	435	6	3.06±0.46
[098]	112.459E, 39.987N	GLD			24	NH4NO3		1	4.7	435	6	2.83±0.31
[098]	112.459E, 39.987N	GLD			32	NH4NO3		1	4.7	435	6	2.6±0.31
[098]	112.459E, 39.987N	GLD			0	NH4NO3		2	4.7	435	6	2.69±0.37
[098]	112.459E, 39.987N	GLD			1	NH4NO3		2	4.7	435	6	2.73±0.37
[098]	112.459E, 39.987N	GLD			2	NH4NO3		2	4.7	435	6	2.69±0.35
[098]	112.459E, 39.987N	GLD			4	NH4NO3		2	4.7	435	6	2.88±0.42
[098]	112.459E, 39.987N	GLD			8	NH4NO3		2	4.7	435	6	3.6±0.46
[098]	112.459E, 39.987N	GLD			16	NH4NO3		2	4.7	435	6	3.38±0.46
[098]	112.459E, 39.987N	GLD			24	NH4NO3		2	4.7	435	6	3.59±0.3
[098]	112.459E, 39.987N	GLD			32	NH4NO3		2	4.7	435	6	2.82±0.46
[099]	116.675E, 43.55N	GLD	0.3		0	NH4NO3	7.19±0.12	13	0.3	346.1	6								0.23±0.01(%)
[099]	116.675E, 43.55N	GLD	0.3		1.75	NH4NO3	6.46±0.07	13	0.3	346.1	6								0.23±0.01(%)
[099]	116.675E, 43.55N	GLD	0.3		5.25	NH4NO3	6.22±0.12	13	0.3	346.1	6								0.26±0.01
[099]	116.675E, 43.55N	GLD	0.3		10.5	NH4NO3	5.64±0.14	13	0.3	346.1	6								0.23±0.01(%)
[099]	116.675E, 43.55N	GLD	0.3		17.5	NH4NO3	5.61±0.38	13	0.3	346.1	6								0.24±0.01
[099]	116.675E, 43.55N	GLD	0.3		28	NH4NO3	5.34±0.09	13	0.3	346.1	6								0.25±0.01
[100]	116.7E,43.38N	GLD	1.8		0	NH4NO3		11	0.9	355.3	10	2.5±0.2	1.78±0.148
[100]	116.7E,43.38N	GLD	1.8		2	NH4NO3		11	0.9	355.3	10	2.195±0.19	1.53±0.15
[100]	116.7E,43.38N	GLD	1.8		5	NH4NO3		11	0.9	355.3	10	2.31±0.18	1.53±0.13
[100]	116.7E,43.38N	GLD	1.8		10	NH4NO3		11	0.9	355.3	10	1.99±0.16	1.29±0.1
[100]	116.7E,43.38N	GLD	1.8		20	NH4NO3		11	0.9	355.3	10	1.74±0.14	1.21±0.1
[100]	116.7E,43.38N	GLD	1.8		50	NH4NO3		11	0.9	355.3	10	1.64±0.13	1.07±0.09
[100]	116.7E,43.38N	GLD	1.8		0	NH4NO3		11	0.9	355.3	10	2.49±0.21	1.78±0.15
[100]	116.7E,43.38N	GLD	1.8		2	NH4NO3		11	0.9	355.3	10	2.34±0.186	1.55±0.14
[100]	116.7E,43.38N	GLD	1.8		5	NH4NO3		11	0.9	355.3	10	1.98±0.148	1.43±0.11
[100]	116.7E,43.38N	GLD	1.8		10	NH4NO3		11	0.9	355.3	10	2.187±0.17	1.41±0.12
[100]	116.7E,43.38N	GLD	1.8		20	NH4NO3		11	0.9	355.3	10	2.12±0.15	1.2±0.09
[100]	116.7E,43.38N	GLD	1.8		50	NH4NO3		11	0.9	355.3	10	1.71±0.12	1.12±0.09
[100]	116.7E,43.38N	GLD	1.8		0	NH4NO3		12	0.9	355.3	10	2.07±0.16	1.25±0.07
[100]	116.7E,43.38N	GLD	1.8		2	NH4NO3		12	0.9	355.3	10	1.82±0.13	1.18±0.08
[100]	116.7E,43.38N	GLD	1.8		5	NH4NO3		12	0.9	355.3	10	2.02±0.15	1.26±0.08
[100]	116.7E,43.38N	GLD	1.8		10	NH4NO3		12	0.9	355.3	10	1.71±0.14	0.96±0.05
[100]	116.7E,43.38N	GLD	1.8		20	NH4NO3		12	0.9	355.3	10	1.46±0.09	0.86±0.05
[100]	116.7E,43.38N	GLD	1.8		50	NH4NO3		12	0.9	355.3	10	1.515±0.12	0.917±0.06
[100]	116.7E,43.38N	GLD	1.8		0	NH4NO3		12	0.9	355.3	10	2.08±0.155	1.24±0.08
[100]	116.7E,43.38N	GLD	1.8		2	NH4NO3		12	0.9	355.3	10	1.99±0.155	1.14±0.087
[100]	116.7E,43.38N	GLD	1.8		5	NH4NO3		12	0.9	355.3	10	1.94±0.14	1.08±0.076
[100]	116.7E,43.38N	GLD	1.8		10	NH4NO3		12	0.9	355.3	10	1.76±0.135	1.06±0.06
[100]	116.7E,43.38N	GLD	1.8		20	NH4NO3		12	0.9	355.3	10	1.63±0.11	0.85±0.05
[100]	116.7E,43.38N	GLD	1.8		50	NH4NO3		12	0.9	355.3	10	1.56±0.12	0.97±0.07
[101]	113E,28.1N	SubTR-DF			0	NH4NO3		2	17.2	1422	3	2.88±0.26			16.12±1.18	0.25±0.01
[101]	113E,28.1N	SubTR-DF			5	NH4NO3		2	17.2	1422	3	1.86±0.18			17.13±1.19	0.24±0.01
[101]	113E,28.1N	SubTR-DF			15	NH4NO3		2	17.2	1422	3	2±0.18			16.87±1.21	0.26±0.01
[101]	113E,28.1N	SubTR-DF			30	NH4NO3		2	17.2	1422	3	1.82±0.16			16.79±1.22	0.26±0.01
[102]	128.89E,47.18N	B-CF			0	CO(NH2)2		3	-0.3	676	3	3.09±0.23			14.19±1.11	41.37±1.83								377±54
[102]	128.89E,47.18N	B-CF			3	CO(NH2)2		3	-0.3	676	3	2.78±0.21			13.87±1.13	45.52±1.81								335±14
[102]	128.89E,47.18N	B-CF			6	CO(NH2)2		3	-0.3	676	3	3.06±0.23			13.78±1.03	42.36±2.51								365±25
[102]	128.89E,47.18N	B-CF			12	CO(NH2)2		3	-0.3	676	3	2.9±0.23			14.2±1.1	42.49±1.42								400±24
[103]	118.7E,32.2N	SubTR-DF	3-3.7		0	NH4NO3		1	15.5	1019.5	4	339.5±16.85						32.1g kg-1	2.1g kg-1
[103]	118.7E,32.2N	SubTR-DF	3-3.7		5	NH4NO3		1	15.5	1019.5	4	310.62±43.96
[103]	118.7E,32.2N	SubTR-DF	3-3.7		10	NH4NO3		1	15.5	1019.5	4	306.43±15.33
[103]	118.7E,32.2N	SubTR-DF	3-3.7		15	NH4NO3		1	15.5	1019.5	4	301.35±18.17
[104]	119.7E,30.23N	SubTR-DF	3-3.7		0	NH4NO3		4	15.6	1420	3	30.78±4.52
[104]	119.7E,30.23N	SubTR-DF	3-3.7		3	NH4NO3		4	15.6	1420	3	45.27±4.4
[104]	119.7E,30.23N	SubTR-DF	3-3.7		6	NH4NO3		4	15.6	1420	3	42.95±3.12
[104]	119.7E,30.23N	SubTR-DF	3-3.7		9	NH4NO3		4	15.6	1420	3	35.3±2.55
[105]	116.67E,43.53N	GLD			0	NH4NO3		1	-0.1	400	5	199.32±45.74						16.52±1.05(g/kg)	1.43±0.27						60	19	21
[105]	116.67E,43.53N	GLD			5	NH4NO3		1	-0.1	400	5	228.21±59.49
[105]	116.67E,43.53N	GLD			10	NH4NO3		1	-0.1	400	5	209±61.62
[105]	116.67E,43.53N	GLD			20	NH4NO3		1	-0.1	400	5	210.81±63.51
[105]	116.67E,43.53N	GLD			0	NH4NO3		1	-0.1	400	5	288.15±55.65
[105]	116.67E,43.53N	GLD			5	NH4NO3		1	-0.1	400	5	295.67±80.73
[105]	116.67E,43.53N	GLD			10	NH4NO3		1	-0.1	400	5	288.98±78.51
[105]	116.67E,43.53N	GLD			20	NH4NO3		1	-0.1	400	5	292.86±78.47
[106]	117.75E,27.71N	SubTR-DF			0	NH4NO3		1	17.5	1818	3	5.67±0.29	3.77±0.37
[106]	117.75E,27.71N	SubTR-DF			5	NH4NO3		1	17.5	1818	3	5.98±0.46	3.93±0.35
[106]	117.75E,27.71N	SubTR-DF			10	NH4NO3		1	17.5	1818	3	6.22±0.37	5.08±0.48
[106]	117.75E,27.71N	SubTR-DF			15	NH4NO3		1	17.5	1818	3	4.22±0.55	3.49±0.46
[107]	103.63E,30.58N	SubTR-DF			0	NH4NO3		3	15	1489.8	3	1.03±0.09					383.76±23.65			0.46±0.002(mg g-1)	0.02±0
[107]	103.63E,30.58N	SubTR-DF			5	NH4NO3		3	15	1489.8	3	1.24±0.11					384.79±24.86			0.497±0.004	0.022±0
[107]	103.63E,30.58N	SubTR-DF			15	NH4NO3		3	15	1489.8	3	1.42±0.15					385.83±42.12			0.553±0.007	0.023±0.001
[107]	103.63E,30.58N	SubTR-DF			30	NH4NO3		3	15	1489.8	3	0.92±0.09					385.83±35.73			0.54±0.008	0.022±0.001
[108]	113E,36.8N	TE-DF			0	NH4NO3	7.6±0.1	1	6.2	770	3	2.61						20.0±0.04(g kg-1)	2.32±0.03	249.72±7.41(mg/kg)	69.1±3.22
[108]	113E,36.8N	TE-DF			5	NH4NO3	7.7±0.1	1	6.2	770	3	2.79						19.8±0.1	2.35±0.02	284.64±21.52	70.02±3.74
[108]	113E,36.8N	TE-DF			10	NH4NO3	7.7±0.1	1	6.2	770	3	3.3						19.9±0.1	2.38±0.03	344.61±26.45	86.44±4.99
[108]	113E,36.8N	TE-DF			15	NH4NO3	7.7±0.1	1	6.2	770	3	4.47						20.0±0.1	2.47±0.04	395.05±3.88	86.44±5.45
[109]	103.5E, 29.67N	SubTR-EF			0	NH4NO3		1	16.2	1772.2	3	556.45								645.16±43.29(mg/kg)	53.72±4.47
[109]	103.5E, 29.67N	SubTR-EF			5	NH4NO3		1	16.2	1772.2	3	518.19								583.7±30.47	47.39±5.2
[109]	103.5E, 29.67N	SubTR-EF			15	NH4NO3		1	16.2	1772.2	3	468.76								548.95±34.74	42.68±4.51
[109]	103.5E, 29.67N	SubTR-EF			30	NH4NO3		1	16.2	1772.2	3	399.69								484.28±34.21	40.86±5.4
[110]	129.1E, 48.1N	B-CF			0	NH4NO3	5.10±0.48	5	-0.5	728	3	17.53±0.43						103.10±5.13	13.17±3.28(mg g-1)	1.64±0.46(mg g-1)	0.20±0.05
[110]	129.1E, 48.1N	B-CF			5	NH4NO3	5.00±0.57	5	-0.5	728	3	16.44±0.58						169.32±6.45	15.43±5.86	1.63±0.47	0.18±0.05
[110]	129.1E, 48.1N	B-CF			10	NH4NO3	4.87±0.61	5	-0.5	728	3	10.67±0.75						171.85±4.82	16.19±7.46	1.49±0.51	0.16±0.06
[110]	129.1E, 48.1N	B-CF			15	NH4NO3	4.72±0.75	5	-0.5	728	3	11.24±0.69						166.63±7.21	19.29±6.82	1.47±0.51	0.15±0.05
[111]	113E,28.1N	SubTR-CF	3.14		0	NH4NO3		2	17.2	1422	3	313.4±34.6					55.48±4.52(g m-2)			315.99±44.21(mg kg-1)	31.87±3.43			520.72±56.75(g m-2)
[111]	113E,28.1N	SubTR-CF	3.14		5	NH4NO3		2	17.2	1422	3	237.92±25.39					51.52±5.4			256.99±37.09	27.02±4.14			404.92±58.95
[111]	113E,28.1N	SubTR-CF	3.14		15	NH4NO3		2	17.2	1422	3	262.37±28.58					51.52±5.07			238.55±37.96	22.94±2.05			413.87±38.57
[111]	113E,28.1N	SubTR-CF	3.14		30	NH4NO3		2	17.2	1422	3	234.85±18.3					50.25±4.02			193.2±33.43	19.34±4.48			403.94±14.32
[112]	103E,30.1N	SubTR-DF			0	NH4NO3		1	16.1	1772.2	3	1.48±0.15						11.35±0.03(g kg-1)	936.73±0.03(mg kg-1)	377.423±28.43(mg kg-1)	45.06±4.18
[112]	103E,30.1N	SubTR-DF			5	NH4NO3		1	16.1	1772.2	3	1.19±0.21								263.7±37	34.48±5.5
[112]	103E,30.1N	SubTR-DF			15	NH4NO3		1	16.1	1772.2	3	0.84±0.12								231.21±21.21	17.84±1.71
[112]	103E,30.1N	SubTR-DF			30	NH4NO3		1	16.1	1772.2	3	0.77±0.12								202.77±9.93	12.91±3.21
[113]	3.475W, 54.0305N	GLD			0	NH4NO3		2	14	1049	5	55.65±5.66					28.36±2.71(g m-2)
[113]	3.475W, 54.0305N	GLD			10	NH4NO3		2	14	1049	5	58.48±4.24					21.75±4.07
[114]	117.25E,31.9N	SubTR-DF			0	NH4NO3		1	17.5	992	3	1.84±0.19	1.04±0.186	0.8±0.09
[114]	117.25E,31.9N	SubTR-DF			5	NH4NO3		1	17.5	992	3	1.933±0.288	1.16±0.143	0.773±0.147
[114]	117.25E,31.9N	SubTR-DF			10	NH4NO3		1	17.5	992	3	1.91±0.26	1.08±0.16	0.83±0.14
[114]	117.25E,31.9N	SubTR-DF			0	NH4NO3		2	17.5	992	3	2.24±0.22	0.84±0.13	1.4±0.21
[114]	117.25E,31.9N	SubTR-DF			5	NH4NO3		2	17.5	992	3	2.22±0.17	1.06±0.18	1.16±0.2
[114]	117.25E,31.9N	SubTR-DF			10	NH4NO3		2	17.5	992	3	2.37±0.25	1.3±0.137	1.07±0.18
[114]	117.25E,31.9N	SubTR-DF			0	NH4NO3		3	17.5	992	3	2.5±0.26	1.1±0.176	1.4±0.176
[114]	117.25E,31.9N	SubTR-DF			5	NH4NO3		3	17.5	992	3	2.31±0.166	0.7±0.19	1.61±0.11
[114]	117.25E,31.9N	SubTR-DF			10	NH4NO3		3	17.5	992	3	2.09±0.288	0.98±0.16	1.11±0.2
[115]	76.5W,42.4N	TE-DF	1.12		0	NH4NO3		10	7.9	973	4									11.23±0.81(mg g-1)
[115]	76.5W,42.4N	TE-DF	1.12		5	NH4NO3		10	7.9	973	4									9.7±0.86
[116]	127.5E,45.4N	TE-DF			0	NH4NO3		2	2.8	723	3	2.08±0.05					74.23±4.69(g m-2)			421.13±13.51(mg kg-1)
[116]	127.5E,45.4N	TE-DF			5	NH4NO3		2	2.8	723	3	2.32±0.16					81.85±3.3			590.36±33.16
[116]	127.5E,45.4N	TE-DF			10	NH4NO3		2	2.8	723	3	1.976±0.14					63.15±3.93			465.95±6.67
[116]	127.5E,45.4N	TE-DF			15	NH4NO3		2	2.8	723	3	1.84±0.06					55.21±5.6			481.69±19.06
[116]	127.5E,45.4N	TE-DF			0	NH4NO3		2	2.8	723	3	2.34±0.17					83.1±2.28			612.91±45.05
[116]	127.5E,45.4N	TE-DF			5	NH4NO3		2	2.8	723	3	2.74±0.1					77.66±1.91			771.92±17.92
[116]	127.5E,45.4N	TE-DF			10	NH4NO3		2	2.8	723	3	2.77±0.19					71.214.46			898.93±33.34
[116]	127.5E,45.4N	TE-CF			15	NH4NO3		2	2.8	723	3	1.877±0.126					65.64±3.88			741.88±5.89
[116]	127.5E,45.4N	TE-CF			0	NH4NO3		2	2.8	723	3	1.66±0.02					39.15±4.31			922.24±47.84
[116]	127.5E,45.4N	TE-CF			5	NH4NO3		2	2.8	723	3	1.87±0.076					45.76±1.93			1170.34±73.61
[116]	127.5E,45.4N	TE-CF			10	NH4NO3		2	2.8	723	3	1.556±0.06					35.5±1.46			946.56±26.1121
[116]	127.5E,45.4N	TE-CF			15	NH4NO3		2	2.8	723	3	1.49±0.02					25.87±1.53			934.35±45.26
[116]	127.5E,45.4N	TE-CF			0	NH4NO3		2	2.8	723	3	1.6±0.02					50.79±3.39			589.71±22.06
[116]	127.5E,45.4N	TE-CF			5	NH4NO3		2	2.8	723	3	1.75±0.05					53.1±3.67			757.73±34.57
[116]	127.5E,45.4N	TE-CF			10	NH4NO3		2	2.8	723	3	1.41±0.04					34.54±3.39			642.12±16.21
[116]	127.5E,45.4N	TE-CF			15	NH4NO3		2	2.8	723	3	1.31±0.02					34.96±1.81			621.83±24.8
[117]	112E,36.75N	TE-CF	2.12		0	NH4NO3		2	6.2	600	3	2.89±0.26			9.19±0.79	22.02±1.4
[117]	112E,36.75N	TE-CF	2.12		5	NH4NO3		2	6.2	600	3	2.45±0.24			9.28±0.77	19.07±1.23
[117]	112E,36.75N	TE-CF	2.12		10	NH4NO3		2	6.2	600	3	3.63±0.42			9.18±0.73	20.89±1.17
[117]	112E,36.75N	TE-CF	2.12		15	NH4NO3		2	6.2	600	3	4.34±0.57			9.64±0.77	19.99±1.31
[118]	119E,25.5N	TR-EF			0	NH4NO3		8	23	1550	6	929	740.44	188.56		20.82 ±2.92		28.83 ±6.41(g kg-1)	1.39 ±0.14
[118]	119E,25.5N	TR-EF			10	NH4NO3		8	23	1550	6	842.74	677.58	165.16		22.94 ±0.72		24.84 ±5.38	1.48 ±0.53
[119]	119.7E,30.23N	SubTR-DF	3.09		0	NH4NO3		2	15.6	1420	3	293.21±7.67						23.73±0.24(mg g-1)	1.11±0.04
[119]	119.7E,30.23N	SubTR-DF	3.09		3	NH4NO3		2	15.6	1420	3	479.66±9.08
[119]	119.7E,30.23N	TE-DF	3.09		6	NH4NO3		2	15.6	1420	3	513.56±14.12
[119]	119.7E,30.23N	TE-DF	3.09		9	NH4NO3		2	15.6	1420	3	376.95±5.04
[119]	119.7E,30.23N	TE-DF	3.09		0	NH4NO3		3	15.6	1420	3	335.18±8,47
[119]	119.7E,30.23N	TE-DF	3.09		3	NH4NO3		3	15.6	1420	3	570.66±10.29
[119]	119.7E,30.23N	TE-DF	3.09		6	NH4NO3		3	15.6	1420	3	509.12±7.87
[119]	119.7E,30.23N	TE-DF	3.09		9	NH4NO3		3	15.6	1420	3	443.54±4.84
[119]	119.7E,30.23N	TE-DF	3.09		0	NH4NO3		4	15.6	1420	3	409.03±6.05
[119]	119.7E,30.23N	TE-DF	3.09		3	NH4NO3		4	15.6	1420	3	547.66±15.74
[119]	119.7E,30.23N	TE-DF	3.09		6	NH4NO3		4	15.6	1420	3	494.39±12.91
[119]	119.7E,30.23N	TE-DF	3.09		9	NH4NO3		4	15.6	1420	3	403.18±8.68
[119]	119.7E,30.23N	TE-DF	3.09		0	NH4NO3		5	15.6	1420	3	376.75±7.06
[119]	119.7E,30.23N	TE-DF	3.09		3	NH4NO3		5	15.6	1420	3	473.40±6.66
[119]	119.7E,30.23N	TE-DF	3.09		6	NH4NO3		5	15.6	1420	3	440.11±6.46
[119]	119.7E,30.23N	TE-DF	3.09		9	NH4NO3		5	15.6	1420	3	385.43±6.05
[119]	119.7E,30.23N	TE-DF	3.09		0	NH4NO3		6	15.6	1420	3	415.89±6.46
[119]	119.7E,30.23N	TE-DF	3.09		3	NH4NO3		6	15.6	1420	3	508.51±13.11
[119]	119.7E,30.23N	TE-DF	3.09		6	NH4NO3		6	15.6	1420	3	473±9.08
[119]	119.7E,30.23N	TE-DF	3.09		9	NH4NO3		6	15.6	1420	3	398.14±10.49
[119]	119.7E,30.23N	TE-DF	3.09		0	NH4NO3		7	15.6	1420	3	394.51±9.08
[119]	119.7E,30.23N	TE-DF	3.09		3	NH4NO3		7	15.6	1420	3	498.02±10.69
[119]	119.7E,30.23N	TE-DF	3.09		6	NH4NO3		7	15.6	1420	3	481.67±14.73
[119]	119.7E,30.23N	TE-DF	3.09		9	NH4NO3		7	15.6	1420	3	398.34±14.33
[119]	119.7E,30.23N	TE-DF	3.09		0	NH4NO3		8	15.6	1420	3	421.95±6.86
[119]	119.7E,30.23N	TE-DF	3.09		3	NH4NO3		8	15.6	1420	3	503.67±14.12
[119]	119.7E,30.23N	TE-DF	3.09		6	NH4NO3		8	15.6	1420	3	472.19±24.01
[119]	119.7E,30.23N	TE-DF	3.09		9	NH4NO3		8	15.6	1420	3	445.56±20.98
[119]	119.7E,30.23N	TE-DF	3.09		0	NH4NO3		9	15.6	1420	3	412.67±3.43
[119]	119.7E,30.23N	TE-DF	3.09		3	NH4NO3		9	15.6	1420	3	528.49±2.62
[119]	119.7E,30.23N	TE-DF	3.09		6	NH4NO3		9	15.6	1420	3	490.95±2.82
[119]	119.7E,30.23N	TE-DF	3.09		9	NH4NO3		9	15.6	1420	3	459.28±3.63
[119]	119.7E,30.23N	TE-DF	3.09		0	NH4NO3		10	15.6	1420	3	379.57±4.24
[119]	119.7E,30.23N	TE-DF	3.09		3	NH4NO3		10	15.6	1420	3	479.67±10.69
[119]	119.7E,30.23N	TE-DF	3.09		6	NH4NO3		10	15.6	1420	3	454.23±2.22
[119]	119.7E,30.23N	TE-DF	3.09		9	NH4NO3		10	15.6	1420	3	434.05±4.24
[119]	119.7E,30.23N	TE-DF	3.09		0	NH4NO3		11	15.6	1420	3	363.43±8.67
[119]	119.7E,30.23N	TE-DF	3.09		3	NH4NO3		11	15.6	1420	3	447.78±3.43
[119]	119.7E,30.23N	TE-DF	3.09		6	NH4NO3		11	15.6	1420	3	414.68±5.65
[119]	119.7E,30.23N	TE-DF	3.09		9	NH4NO3		11	15.6	1420	3	358.19±7.26
[120]	4.11W,40.736N	Shrublands	0.75		0	NH4NO3	3.95±0.05	2	0.2		4	1087.61±37.7	1125.31				0.11±0.01(kg m-2)		85.5±5.1(mg kg-1)
[120]	4.11W,40.736N	Shrublands	0.75		1.5	NH4NO3	4.02±0.07	2	0.2		4	1089.66±31.96	1121.62				0.25±0.04		66.6±13.6
[120]	4.11W,40.736N	Shrublands	0.75		5	NH4NO3	3.95±0.09	2	0.2		4	960.18±33.6	993.78				0.2±0.02		81.6±5.8
[120]	4.11W,40.736N	Shrublands	0.75		0	NH4NO3	4.07±0.06	3	0.2		4	1309.28±37.69	1346.97				0.2±0.02		71.3±12.9
[120]	4.11W,40.736N	Shrublands	0.75		1.5	NH4NO3	4.02±0.07	3	0.2		4	1033.53±31.54	1065.07				0.13±0.01		63.8±6.1
[120]	4.11W,40.736N	Shrublands	0.75		5	NH4NO3	3.96±0.06	3	0.2		4	990.09±41.38	1031.47				0.18±0.05		77.1±14.7
[121]	102.87E,33.62N	GLD			0	Others	5.82±0.08	4	0.2	700	4	4.84±0.57	2.43±0.3	2.41	13.69±0.81	32.96±0.94			5.09(mg g-1)	478.15±29.325(mg kg-1)	99.78±6.64
[121]	102.87E,33.62N	GLD			2	Others	5.67±0.03	4	0.2	700	4	5.43±0.46	2.97±0.42	2.46	13.85±0.46	32.96±0.94				542.08±66.86	13.16±9.9
[121]	102.87E,33.62N	GLD			4	Others	5.84±0.12	4	0.2	700	4	4.66±0.62	2.52±0.23	2.14	14.02±0.73	33.63±0.94				450.587±89.15	82.36±16
[121]	102.87E,33.62N	GLD			8	Others	5.87±0.12	4	0.2	700	4	5.36±0.66	2.81±0.35	2.55	13.21±0.53	31.74±32.3				450.58±42.81	78.76±3.7
[121]	102.87E,33.62N	GLD			16	Others	5.85±0.07	4	0.2	700	4	5.18±0.3	2.6±0.15	2.58	13.4±0.48	32.58±33.52				338.56±65.1	64.17±17.31
[121]	102.87E,33.62N	GLD			32	Others	5.31±0.055	4	0.2	700	4	5.02±0.53	2.78±0.35	2.24	13.4±0.45	33.52±35.23				466.42±68.62	26.93±6.86
[122]	102.58E,32.83N	GLD	0.053		0	NH4NO3		7	1.5	747	5	0.91±0.03					560.14±26.15(g m-2)					243.65±9.01
[122]	102.58E,32.83N	GLD	0.053		2	NH4NO3		7	1.5	747	5	0.9±0.02					604.54±40.46					242.28±3.53
[122]	102.58E,32.83N	GLD	0.053		4	NH4NO3		7	1.5	747	5	0.93±0.02					551.76±14.3					332.81±4.7
[122]	102.58E,32.83N	GLD	0.053		8	NH4NO3		7	1.5	747	5	0.825±0.01					451.12±15.78					302.05±8.62
[122]	102.58E,32.83N	GLD	0.053		16	NH4NO3		7	1.5	747	5	0.71±0.01					455.06±37.49					255.41±8.23
[122]	102.58E,32.83N	GLD	0.053		32	NH4NO3		7	1.5	747	5	0.78±0.02					357.38±20.22					192.9±13.32
[123]	91.1E,30.85N	GLD	0.7		0	NH4NO3	6.95	2	1.3	477	4							1.94(%)	0.12	233.87±17.34(g kg-1)	19.15±2.67	64.95±4.17( g m-2)
[123]	91.1E,30.85N	GLD	0.7		1	NH4NO3		2	1.3	477	4									223.87±23.37	17.93±1.84	87.91±8.17
[123]	91.1E,30.85N	GLD	0.7		2	NH4NO3		2	1.3	477	4									238.19±27.9	20.95±1.22	87.386±3.13
[123]	91.1E,30.85N	GLD	0.7		4	NH4NO3		2	1.3	477	4									223.87±22.24	19.53±4.46	98.342±7.826
[123]	91.1E,30.85N	GLD	0.7		0	NH4NO3		2	1.3	477	4									233.87±17.34(g kg-1)	19.15±2.67	64.95±4.17( g m-2)
[123]	91.1E,30.85N	GLD	0.7		1	NH4NO3		2	1.3	477	4									261.19±42.22	19.28±1.81	64.6±6.26
[123]	91.1E,30.85N	GLD	0.7		2	NH4NO3		2	1.3	477	4									299.266±52.4	22.9±0.83	69.17±4.52
[123]	91.1E,30.85N	GLD	0.7		4	NH4NO3		2	1.3	477	4									280.42±35.06	29.43±4.47	79.56±5.56
[123]	91.1E,30.85N	GLD	0.7		0	NH4NO3		3	1.3	477	4											86.29±10.66
[123]	91.1E,30.85N	GLD	0.7		1	NH4NO3		3	1.3	477	4											125.68±11.87
[123]	91.1E,30.85N	GLD	0.7		2	NH4NO3		3	1.3	477	4											130.84±16.85
[123]	91.1E,30.85N	GLD	0.7		4	NH4NO3		3	1.3	477	4											118.45±11.78
[123]	91.1E,30.85N	GLD	0.7		0	NH4NO3		3	1.3	477	4											86.29±10.66
[123]	91.1E,30.85N	GLD	0.7		1	NH4NO3		3	1.3	477	4											81.12±11.87
[123]	91.1E,30.85N	GLD	0.7		2	NH4NO3		3	1.3	477	4											84.57±9.63
[123]	91.1E,30.85N	GLD	0.7		4	NH4NO3		3	1.3	477	4											94.72±12.38
[124]	111.9E,41.8N	GLD			0	NH4NO3		1		280	3	2.71±0.28
[124]	111.9E,41.8N	GLD			10	NH4NO3		1		280	3	2.66±0.28
[124]	111.9E,41.8N	GLD			0	NH4NO3		2		280	3	2.25±0.29
[124]	111.9E,41.8N	GLD			10	NH4NO3		2		280	3	2.381±0.28
[125]	105.7E,25.65N	SubTR-DF			0		7.14 ± 0.25	3	18.4	1100	3					26.69 ± 3.74		36.15±5.69(g kg-1)	4.08±0.44
[125]	105.7E,25.65N	SubTR-DF			0.17	N-P2O5-K2O	7.55 ± 0.59	3	18.4	1100	3					22.34 ± 6.71		16.36 ± 1.94	2.43 ± 0.17
[126]	114.05E,31.8N	TE-DF	2		0	NH4NO3	4.48±0.25	10	15.2	1119	4	23.28±1.52						29.38±2.86(mg g-1)	1.04±0.11
[126]	114.05E,31.8N	TE-DF	2		2.5	NH4NO3	4.09±0.07	10	15.2	1119	4	25.51±4.63						34.88±6.13	1.65±0.18
[126]	114.05E,31.8N	TE-DF	2		5	NH4NO3	4.09±0.07	10	15.2	1119	4	23.74±1.03						44.09±9.34	1.82±0.27
[126]	114.05E,31.8N	TE-DF	2		2.5	NH4NO3	4.05±0.11	10	15.2	1119	4	25.06±1.89						37.15±4.62	1.37±0.11
[126]	114.05E,31.8N	TE-DF	2		5	NH4NO3	4.02±0.07	10	15.2	1119	4	27.79±2.09						39.31±2.73	1.69±0.27
[127]	115.05E,26.75N	SubTR-DF			0	NH4NO3	4.55	8	17.9	1475	3	38.11±1.63						19.84(g kg-1)	1.29
[127]	115.05E,26.75N	SubTR-DF			5	NH4NO3	4.36	8	17.9	1475	3	39.82±1.87						20.7	1.25
[127]	115.05E,26.75N	SubTR-DF			0	NH4NO3	4.43	8	17.9	1475	3	41.24±1.95						21.83	1.27
[127]	115.05E,26.75N	SubTR-DF			5	NH4NO3	4.29	8	17.9	1475	3	57.5±4.84						28.6	1.57
[127]	115.05E,26.75N	SubTR-DF			0	NH4NO3	4.26	8	17.9	1475	3	52.58±3.34						20.41	1.28
[127]	115.05E,26.75N	SubTR-DF			5	NH4NO3	4.25	8	17.9	1475	3	64.92±4.42						26.37	1.57
[128]	10.458E,51.1N	TE-DF	1.5		0	NH4NO3		10	7.25	650	5	27.47 ± 15.4
[128]	10.458E,51.1N	TE-DF	1.5		4	NH4NO3		10	7.25	650	5	19.91 ± 6.84
[128]	10.458E,51.1N	TE-DF	1.5		0	NH4NO3		10	7.25	650	5	14.73 ± 7.21
[128]	10.458E,51.1N	TE-DF	1.5		4	NH4NO3		10	7.25	650	5	22.56 ± 7.79
[128]	10.458E,51.1N	TE-DF	1.5		0	NH4NO3		10	7.25	650	5	24.12 ± 9.86
[128]	10.458E,51.1N	TE-DF	1.5		4	NH4NO3		10	7.25	650	5	24.19 ± 6.15
[128]	10.458E,51.1N	TE-DF	1.5		0	NH4NO3		10	7.25	650	5	18.57 ± 7.78
[128]	10.458E,51.1N	TE-DF	1.5		4	NH4NO3		10	7.25	650	5	15.63 ± 4.95
[128]	10.458E,51.1N	TE-DF	1.5		0	NH4NO3		10	7.25	650	5	7.28 ± 1.84
[128]	10.458E,51.1N	TE-DF	1.5		4	NH4NO3		10	7.25	650	5	9.62 ± 5.76
[128]	10.458E,51.1N	TE-DF	1.5		0	NH4NO3		10	7.25	650	5	18.90 ± 10.25
[128]	10.458E,51.1N	TE-DF	1.5		4	NH4NO3		10	7.25	650	5	15.63 ± 4.45
[128]	10.458E,51.1N	TE-DF	1.5		0	NH4NO3		10	7.25	650	5	23.78 ± 5.23
[128]	10.458E,51.1N	TE-DF	1.5		4	NH4NO3		10	7.25	650	5	11.85 ± 4.53
[128]	10.458E,51.1N	TE-DF	1.5		0	NH4NO3		10	7.25	650	5	5.71 ± 4.38
[128]	10.458E,51.1N	TE-DF	1.5		4	NH4NO3		10	7.25	650	5	6.21 ± 4.72
[128]	10.458E,51.1N	TE-DF	1.5		0	NH4NO3		10	7.25	650	5	16.66 ± 9.85
[128]	10.458E,51.1N	TE-DF	1.5		4	NH4NO3		10	7.25	650	5	22.28 ± 9.59
[128]	10.458E,51.1N	TE-CF	1.5		0	NH4NO3		10	7.25	650	5	5.35 ± 1.78
[128]	10.458E,51.1N	TE-CF	1.5		4	NH4NO3		10	7.25	650	5	6.69 ± 3.28
[128]	10.458E,51.1N	TE-CF	1.5		0	NH4NO3		10	7.25	650	5	8.08 ± 1.53
[128]	10.458E,51.1N	TE-CF	1.5		4	NH4NO3		10	7.25	650	5	11.29 ± 3.12
[128]	10.458E,51.1N	TE-CF	1.5		0	NH4NO3		10	7.25	650	5	6.56 ± 1.61
[128]	10.458E,51.1N	TE-CF	1.5		4	NH4NO3		10	7.25	650	5	10.86 ± 4.80
[128]	10.458E,51.1N	TE-CF	1.5		0	NH4NO3		10	7.25	650	5	7.71 ± 3.42
[128]	10.458E,51.1N	TE-CF	1.5		4	NH4NO3		10	7.25	650	5	8.91 ± 4.78
[129]	106.82E,37.12N	GLD			0	NH4NO3		6	8.4	273.8	3	431±20.32						10.522±0.67(g kg-1)				97.67±8.65(g m-2)
[129]	106.82E,37.12N	GLD			10	NH4NO3		6	8.4	273.8	3	573±26.87						10.79±0.66				125.186±9.67
[130]	128.1E.42.61	TE-DF	2.45		0	NH4NO3		12	2.7	871.6	3									873.64±8.6(mg kg-1)	105.79±2.38
[130]	128.1E.42.61	TE-DF	2.45		2.5	NH4NO3		12	2.7	871.6	3									707.18±38.29	153.1±3.65
[130]	128.1E.42.61	TE-DF	2.45		5	NH4NO3		12	2.7	871.6	3									576.66±10.16	112.3±6.03
[131]	100.8E,36.7N	Wetland			0	NH4NO3	8.17 ± 0.48	2	2.5	435	3							57.15±1.44(g kg-1)	4.97 ± ± 0.31
[131]	100.8E,36.7N	Wetland			2	NH4NO3	8.67 ± 0.09	2	2.5	435	3							55.34±7.9	5.1±0.82
[131]	100.8E,36.7N	Wetland			5	NH4NO3	8.77 ± 0.19	2	2.5	435	3							49.87±18.18	4.6±1.14
[131]	100.8E,36.7N	Wetland			10	NH4NO3	9.13 ± 009	2	2.5	435	3							40.53±4.81	4±0.37
[132]	109.93E,19.38N	TR-EF			0	Others		1	20.45	2150	3	3.43±0.3
[132]	109.93E,19.38N	TR-EF			30.24	Others		1	20.45	2150	3	4.35±0.26
[133]	116.47E,39.9N	TE-DF	3.06		0		7.14±0.15	9	11.9	540.7	3	2.18±0.124	1.45±0.09	0.73±0.04	11.5±0.59	24.58±2.15
[133]	116.47E,39.9N	TE-DF	3.06		5	NaNO3	6.35±0.11	9	11.9	540.7	3	2.03±0.11	1.3±0.06	0.73±0.03	11.64±0.99	25.01±2.35
[133]	116.47E,39.9N	TE-DF	3.06		15	NaNO3	6.44±0.1	9	11.9	540.7	3	2±0.1	1.34±0.07	0.66±0.02	10.88±0.65	25.34±2.15
[133]	116.47E,39.9N	TE-DF	3.06		5	NH4NO3	6.39±0.12	9	11.9	540.7	3	1.73±0.07	1.11±0.06	0.62±0.03	11.81±0.48	23.77±2.36
[133]	116.47E,39.9N	TE-DF	3.06		15	NH4NO3	5.9±0.09	9	11.9	540.7	3	1.58±0.09	1±0.04	0.57±0.02	12.01±0.51	23.85±2.5
[133]	116.47E,39.9N	TE-DF	3.06		5	(NH4)2SO4	6.55±0.13	9	11.9	540.7	3	2.59±0.14	1.786±0.1	0.77±0.04	11.75±0.48	24.33±2.45
[133]	116.47E,39.9N	TE-DF	3.06		15	(NH4)2SO4	6.11±0.1	9	11.9	540.7	3	2.93±0.15	2.03±0.1	0.88±0.04	11.74±0.59	24.15±2.69
[134]	103.9E,31.7N	TE-CF			0	NH4NO3		2	8.9	919.5	5	639.36±9
[134]	103.9E,31.7N	TE-CF			25	NH4NO3		2	8.9	919.5	5	508.91±61.08
[134]	103.9E,31.7N	TE-CF			0	NH4NO3		2	8.9	919.5	5	699.75±11.75
[134]	103.9E,31.7N	TE-CF			25	NH4NO3		2	8.9	919.5	5	639.36±37.1
[135]	111.9E,41.8N	GLD			0	NH4NO3		1	4	315.5	6	1.61±0.11			21±0.2	13.8±0.1
[135]	111.9E,41.8N	GLD			10	NH4NO3		1	4	315.5	6	1.62±0.09			20.9±0.2	15±0.2
[135]	111.9E,41.8N	GLD			0	NH4NO3		2	4	315.5	6	1.53±0.16			15±0.1	11.6±0.2
[135]	111.9E,41.8N	GLD			10	NH4NO3		2	4	315.5	6	1.45±0.18			15.2±0.1	11.7±0.1
[136]	133.5E, 47.6N	Wetland	0.76		0	NH4Cl		2	1.75	580		144.38±9.75								213.25±24.25(mg kg-1)		131.21±15.78(g m-2)	115.25±10.18
[136]	133.5E, 47.6N	Wetland	0.76		1	NH4Cl		2	1.75	580		154.12±8.53								248/186±17.59		138.85±16.22	129.07±10.09
[136]	133.5E, 47.6N	Wetland	0.76		3	NH4Cl		2	1.75	580		220.41±18.89								257.00±23.25		149.55±19.12	135.75±14.50
[136]	133.5E, 47.6N	Wetland	0.76		5	NH4Cl		2	1.75	580		310.67±18.89								272.57±20.36		161.58±19.58	167.00±32.19
[137]	81.8W,30.5N	Wetland			0			18	20.13	1321	4	3.81±0.45																10.4(Mg ha-1)	9.2
[137]	81.8W,30.5N	Wetland			13.1			18	20.13	1321	4	4.44±0.586																13.1	9
[138]	127.63E, 41.7N	TE-CF			0	NH4NO3	5.48±0.33	4	2.1	745	3	39.98±4.57			14.25±3.67
[138]	127.63E, 41.7N	TE-CF			5	NH4NO3	5.47±0.09	4	2.1	745	3	30.82±6.54			14.25±3.67
[139]	115.07E,26.75N	SubTR-DF			0	mixed N		4	17.9	1490	3	73.71±0.97	66.84±3.94
[139]	115.07E,26.75N	SubTR-DF			36	mixed N		4	17.9	1490	3	77.91±2.59	66.82±1.02
[140]	113.5E,23.33N	SubTR-DF			0	NH4NO3		3	21.5	1750	2	2.53±0.76
[140]	113.5E,23.33N	SubTR-DF			10	NH4NO3		3	21.5	1750	2	2.8±0.97
[140]	113.5E,23.33N	SubTR-DF			0	NH4NO3		4	21.5	1750	2	2.45±0.92
[140]	113.5E,23.33N	SubTR-DF			10	NH4NO3		4	21.5	1750	2	2.51±1.61
[140]	113.5E,23.33N	SubTR-DF			0	NH4NO3		5	21.5	1750	2	2.61±1.51										4.82±0.02(kg m-2)	1.62±0.09
[140]	113.5E,23.33N	SubTR-DF			10	NH4NO3		5	21.5	1750	2	2.67±1.51										7.94±1.26	2.37±0.15
[141]	116.3E,42N	GLD	2		0	NH4NO3		3	2.1	383	3	3.37±0.1													66.06±0.25	23.61±0.2	10.34±0.11
[141]	116.3E,42N	GLD	2		10	NH4NO3		3	2.1	383	3	3.8±0.17
[141]	116.3E,42N	GLD	2		0	NH4NO3		3	2.1	383	3	2.83±0.16
[141]	116.3E,42N	GLD	2		10	NH4NO3		3	2.1	383	3	3.18±0.11
[141]	116.3E,42N	GLD	2		0	NH4NO3		3	2.1	383	3	3.58±0.14
[141]	116.3E,42N	GLD	2		10	NH4NO3		3	2.1	383	3	3.57±0.12
[141]	116.3E,42N	GLD	2		0	NH4NO3		4	2.1	383	3	1.83±0.11
[141]	116.3E,42N	GLD	2		10	NH4NO3		4	2.1	383	3	1.95±0.13
[141]	116.3E,42N	GLD	2		0	NH4NO3		4	2.1	383	3	1.31±0.09
[141]	116.3E,42N	GLD	2		10	NH4NO3		4	2.1	383	3	1.26±0.071
[141]	116.3E,42N	GLD	2		0	NH4NO3		4	2.1	383	3	1.823±0.09
[141]	116.3E,42N	GLD	2		10	NH4NO3		4	2.1	383	3	1.62±0.11
[141]	116.3E,42N	GLD	2		0	NH4NO3		5	2.1	383	3	2.83±0.13
[141]	116.3E,42N	GLD	2		10	NH4NO3		5	2.1	383	3	3.13±0.24
[141]	116.3E,42N	GLD	2		0	NH4NO3		5	2.1	383	3	2.21±0.07
[141]	116.3E,42N	GLD	2		10	NH4NO3		5	2.1	383	3	2.03±0.08
[141]	116.3E,42N	GLD	2		0	NH4NO3		5	2.1	383	3	2.55±0.28
[141]	116.3E,42N	GLD	2		10	NH4NO3		5	2.1	383	3	2.53±0.17
[142]	155.1245W,19.84N	TR-EF			0	Others		4	21	3600	3	22.2±1.0	20.2±1.6											4.1±0.2(Mg ha-1)				9.8±0.5(Mg ha-1)
[142]	155.1245W,19.84N	TR-EF			22.4	Others		4	21	3600	3	18.4±0.7	16.7±1.2											5.2±0.3				14.8±0.8
[143]	127.55E,45.4N	TE-DF			0	NH4NO3		3	2.8	723	3	3.12±0.25					142.6±10.9(g m-2)
[143]	127.55E,45.4N	TE-DF			10	NH4NO3		3	2.8	723	3	2.32±0.12					111.9±16.9
[143]	127.55E,45.4N	TE-CF			0	NH4NO3		3	2.8	723	3	2.5±0.1					168±15.3
[143]	127.55E,45.4N	TE-CF			10	NH4NO3		3	2.8	723	3	1.84±0.08					142.5±13.5
[143]	127.55E,45.4N	TE-DF			0	NH4NO3		5	2.8	723	3									1175.22±30.37(mg kg-1)	232.97±7.25
[143]	127.55E,45.4N	TE-DF			10	NH4NO3		5	2.8	723	3									1058.28±74.42	132.24±24.64
[143]	127.55E,45.4N	TE-CF			0	NH4NO3		5	2.8	723	3	2.06±0.02								1478.96±159.46	337.33±26.09
[143]	127.55E,45.4N	TE-CF			10	NH4NO3		5	2.8	723	3	2.14±0.09								918.55±129.1	155.79±28.26
[143]	127.55E,45.4N	TE-DF			0	NH4NO3		6	2.8	723	3									1055.24±45.56	208.69±6.16
[143]	127.55E,45.4N	TE-DF			10	NH4NO3		6	2.8	723	3									677.08±19.74	108.69±16.3
[143]	127.55E,45.4N	TE-CF			0	NH4NO3		6	2.8	723	3	2.32±0.08								1100.8±37.97	240.22±28.26
[143]	127.55E,45.4N	TE-CF			10	NH4NO3		6	2.8	723	3	3.8±0.35								756.05±21.26	74.27±9.78
[144]	111.895E,41.779N	GLD			0	NH4NO3		1	3.4	248	6	1.18±0.11											273.64±50.39
[144]	111.895E,41.779N	GLD			10	NH4NO3		1	3.4	248	6	1.29±0.06											244.4±17.99
[144]	111.895E,41.779N	GLD			0	NH4NO3		2	3.4	248	6	1.09±0.04											558.43±22.94
[144]	111.895E,41.779N	GLD			10	NH4NO3		2	3.4	248	6	1.131±0.09											990.32±36
[144]	111.895E,41.779N	GLD			0	NH4NO3		3	3.4	248	6	1.92±0.13											235.85±7.2
[144]	111.895E,41.779N	GLD			10	NH4NO3		3	3.4	248	6	2.04±0.22											234.95±7.65
[145]	116.3E,42N	GLD			0	NH4NO3		2	2.3	380	5				16.32±0.135	11.8±0.36								20.17±0.67(g m-2)				483.5±19.48(g m-2)
[145]	116.3E,42N	GLD			10	NH4NO3		2	2.3	380	5				16.29±0.22	10.45±0.22								29.81±4.2				564.2±17.79
[145]	116.3E,42N	GLD			0	NH4NO3		3	2.3	380	5				17.94±0.23	9.57±0.17								12.82±1.4				414.3±18.92
[145]	116.3E,42N	GLD			10	NH4NO3		3	2.3	380	5				17.98±0.197	9.05±0.15								40.29±4.15				534±20.61
[145]	116.3E,42N	GLD			0	NH4NO3	7.07±0.09	4	2.3	380	5				17.29±0.21	13.42±0.34		27.1±0.28(g kg-1)	2.72±0.04	419.6±9.8(mg kg-1)	57.66±1.14			47.07±1.85				504.7±31.9
[145]	116.3E,42N	GLD			10	NH4NO3	6.61±0.11	4	2.3	380	5				17.38±0.46	13±0.2		27.15±0.1	2.92±0.086	398.7±11.15	50.11±1.68			72.63±3.19				588.2±31.06
[146]	113.5E,23.33N	SubTR-DF			0	NH4NO3		2	21.5	1750	2	2.52±0.02			21.25±0.19	20.42±0.896	1.43±0.06	2.67±0.14(%)				4.37±0.3(kg m-2)
[146]	113.5E,23.33N	SubTR-DF			10	NH4NO3		2	21.5	1750	2	2.56±0.04			21.29±0.07	18.58±0.9	1.17±0.07	2.4±0.16				3.4±0.27
[147]	114.1E,31.85N	TE-DF			0	NH4NO3		2	15.2	1118.7	4	3.5±0.15	2.34±0.21				174.95±2.40(g m-2)			571.73±3.78(mg kg-1)
[147]	114.1E,31.85N	TE-DF			10	NH4NO3		2	15.2	1118.7	4	2.85±0.05	2.72±0.06				177.62±2.52			557.11±3.48
[147]	114.1E,31.85N	TE-DF			0	NH4NO3		3	15.2	1118.7	4	3.2±0.21	3.15±0.13				181.35±4.17			563.41±15.04
[147]	114.1E,31.85N	TE-DF			10	NH4NO3		3	15.2	1118.7	4	2.82±0.18	2.96±0.19				175.07±4.02			545.02±10.30
[148]	104.4E,36N	GLD	2.21		0	NH4NO3		2	6.5	305	6	486.91±14.62
[148]	104.4E,36N	GLD	2.21		4.42	NH4NO3		2	6.5	305	6	551±23.62
[148]	104.4E,36N	GLD	2.21		0	NH4NO3		3	6.5	305	6	477.91±19.12
[148]	104.4E,36N	GLD	2.21		4.42	NH4NO3		3	6.5	305	6	549.88±23.62
[149]	116.7E,43.63N	GLD	0.3		0	5Ca(NO3)2·NH4NO3	7.78±0.19	3	0.3	346	4	2.41±0.13			24.08±0.16	9.92±1.09	197.49±12.54(g m-2)	2.12±0.24(kg m-2)										257.13±14.7(g m-2)
[149]	116.7E,43.63N	GLD	0.3		10.5	5Ca(NO3)2·NH4NO3	7.3±0.19	3	0.3	346	4	2.28±0.083			23.97±0.21	11.22±1.16	230.16±20.13	2.19±0.26										171.52±21.03
[149]	116.7E,43.63N	GLD	0.3		0	5Ca(NO3)2·NH4NO3	7.59±0.16	3	0.3	346	4	2.12±0.05			24.53±0.23	9.96±1.54	180.36±11.83	2.42±0.16										151.05±8.75
[149]	116.7E,43.63N	GLD	0.3		10.5	5Ca(NO3)2·NH4NO3	6.95±0.24	3	0.3	346	4	1.91±0.04			24.74±0.3	10.58±1.37	194.31±5.47	2.45±0.26										185.85±13.77
[150]	115.43E,39.95N	TE-DF	2		0	NH4NO3		1	11	638.8	4	112.23±11.68
[150]	115.43E,39.95N	TE-DF	2		10	NH4NO3		1	11	638.8	4	106.1±9.72
[150]	115.43E,39.95N	TE-CF	2		0	NH4NO3		1	11	638.8	4	69.66±6.11
[150]	115.43E,39.95N	TE-CF	2		10	NH4NO3		1	11	638.8	4	71.44±7.29
[150]	115.43E,39.93N	TE-CF	2		0	NH4NO3		1	11	638.8	4	90.31±9.17
[150]	115.43E,39.93N	TE-CF	2		10	NH4NO3		1	11	638.8	4	95.95±2.67
[151]	116.3E,42.03N	GLD			0	NH4NO3		1	2.2	374	4	411.48±14.954
[151]	116.3E,42.03N	GLD			10	NH4NO3		1	2.2	374	4	435.18±17.08
[151]	116.3E,42.03N	GLD			0	NH4NO3		2	2.2	374	4	402.51±18.36
[151]	116.3E,42.03N	GLD			10	NH4NO3		2	2.2	374	4	419.17±20.92
[151]	116.3E,42.03N	GLD			0	NH4NO3		3	2.2	374	4	248.36±10.67
[151]	116.3E,42.03N	GLD			10	NH4NO3		3	2.2	374	4	220.18±4.697
[151]	116.3E,42.03N	GLD			0	NH4NO3		4	2.2	374	4	390.98±11.31
[151]	116.3E,42.03N	GLD			10	NH4NO3		4	2.2	374	4	333.34±3.843
[151]	116.3E,42.03N	GLD			0	NH4NO3		5	2.2	374	4	282.52±7.045
[151]	116.3E,42.03N	GLD			10	NH4NO3		5	2.2	374	4	236.84±6.618
[151]	116.3E,42.03N	GLD			0	NH4NO3		6	2.2	374	4	329.28±20.06
[151]	116.3E,42.03N	GLD			10	NH4NO3		6	2.2	374	4	294.05±7.045
[151]	116.3E,42.03N	GLD			0	NH4NO3		7	2.2	374	4	337.39±17.72
[151]	116.3E,42.03N	GLD			10	NH4NO3		7	2.2	374	4	301.53±12.81
[151]	116.3E,42.03N	GLD			0	NH4NO3		8	2.2	374	4	209.08±8.540
[151]	116.3E,42.03N	GLD			10	NH4NO3		8	2.2	374	4	170.86±5.978
[151]	116.3E,42.03N	GLD			0	NH4NO3		9	2.2	374	4	390.98±16.43
[151]	116.3E,42.03N	GLD			10	NH4NO3		9	2.2	374	4	356.61±26.04
[151]	116.3E,42.03N	GLD			0	NH4NO3		10	2.2	374	4	243.67±5.978
[151]	116.3E,42.03N	GLD			10	NH4NO3		10	2.2	374	4	206.52±12.16
[151]	116.3E,42.03N	GLD			0	NH4NO3		11	2.2	374	4	324.58±4.270
[151]	116.3E,42.03N	GLD			10	NH4NO3		11	2.2	374	4	296.19±8.967
[152]	104.4E,36N	GLD	2.21		0	NH4NO3		2	6.5	305	5	418.54±16.18	333.74±19.32													76
[152]	104.4E,36N	GLD	2.21		4.42	NH4NO3		2	6.5	305	5	416.84±16.18	294.34±19.32
[152]	104.4E,36N	GLD	2.21		0	NH4NO3		3	6.5	305	5	399.97±8	312.15±5.82
[152]	104.4E,36N	GLD	2.21		4.42	NH4NO3		3	6.5	305	5	385.42±14.8	274.79±19.65
[153]	115.43E,39.97N	TE-CF			0	NH4NO3	6.81±0.03	2	6.3	612	4	66.25±2.95
[153]	115.43E,39.97N	TE-CF			10	NH4NO3	6.52±0.02	2	6.3	612	4	61.3±1.54
[154]	116.68E,43,56N	GLD			0	NH4NO3		1	-0.4	400	3	35.94±2.78								448.67±14.56(mg kg-1)					60	19	21
[154]	116.68E,43,56N	GLD			10	NH4NO3		1	-0.4	400	3	37.17±2.08								446.69±15.435
[155]	103.26E,29.543N	SubTR-EF			0	NH4NO3		2	10	2323	4	591±39								6.14±2.83(g kg-1)	0.2±0.06
[155]	103.26E,29.543N	SubTR-EF			5	NH4NO3		2	10	2323	3	518±38								3.68±0.976	0.24±0.08
[155]	103.26E,29.543N	SubTR-EF			15	NH4NO3		2	10	2323	3	408±31								5±1.14	0.2±0.09
[156]	119.7E,30.23N	SubTR-EF	3.09		0	NH4NO3	4.53±0.02	3	15.6	1420	3	9127.32±276.26						27.8±0.3(mg g-1)	0.9±0.03
[156]	119.7E,30.23N	SubTR-EF	3.09		3	NH4NO3		3	15.6	1420	3	12023.78±496.41
[156]	119.7E,30.23N	SubTR-EF	3.09		6	NH4NO3		3	15.6	1420	3	11121.6±435.98
[156]	119.7E,30.23N	SubTR-EF	3.09		9	NH4NO3		3	15.6	1420	3	8648.17±379.86
[156]	119.7E,30.23N	SubTR-EF	3.09		0	NH4NO3	4.46±0.01	3	15.6	1420	3	9813.67±172.67						23.7±0.2	1.1±0.04
[156]	119.7E,30.23N	SubTR-EF	3.09		3	NH4NO3		3	15.6	1420	3	13159.05±336.7
[156]	119.7E,30.23N	SubTR-EF	3.09		6	NH4NO3		3	15.6	1420	3	11851±289.21
[156]	119.7E,30.23N	SubTR-EF	3.09		9	NH4NO3		3	15.6	1420	3	9666.9±220.15
[157]	118.85E,32.01N	SubTR-CF	6		0	NH4NO3		2			3	1971.72±133.41							1.2(g kg-1)						50.7	36.3	13
[157]	118.85E,32.01N	SubTR-CF	6		6	NH4NO3		2			3	2297.42±186.96
[157]	118.85E,32.01N	SubTR-CF	6		12	NH4NO3		2			3	2219.82±123.91
[157]	118.85E,32.01N	SubTR-CF	6		0	NH4NO3		2			3	1453.38±152.42
[157]	118.85E,32.01N	SubTR-CF	6		6	NH4NO3		2			3	1471.06±99.08
[157]	118.85E,32.01N	SubTR-CF	6		12	NH4NO3		2			3	1519.23±10.00
[157]	118.85E,32.01N	SubTR-CF	6		0	NH4NO3		2			3	1712.55±142.92
[157]	118.85E,32.01N	SubTR-CF	6		6	NH4NO3		2			3	1884.24±143.02
[157]	118.85E,32.01N	SubTR-CF	6		12	NH4NO3		2			3	1869.53±66.96
[158]	109.25E,36.75N	GLD	2.176		0	5Ca(NO3)2·NH4NO3	8.51	2	8.8	529	3	2528.64	1354.76	1173.89					0.94(g kg-1)
[158]	109.25E,36.75N	GLD	2.176		5	5Ca(NO3)2·NH4NO3		2	8.8	529	3	2686.79	1394.29	1292.5
[158]	109.25E,36.75N	GLD	2.176		10	5Ca(NO3)2·NH4NO3		2	8.8	529	3	2615.62	1465.46	1150.17
[159]	117.3E, 31.9N	SubTR-DF	1.85		0	NH4NO3	4.86±0.09	6	15.7	995.4	3	2.1±0.49								205.6±30.79(mg kg-1)	38.07±6.03	46.4±0.71
[159]	117.3E, 31.9N	SubTR-DF	1.85		5	NH4NO3	4.92±0.13	6	15.7	995.4	3	2.08±0.7								229.33±29.81	42.37±7.04	34.56±0.96
[159]	117.3E, 31.9N	SubTR-DF	1.85		10	NH4NO3	5.01±0.07	6	15.7	995.4	3	2.09±0.4								223.09±36.08	45.52±7.93	37.6±0.32
[160]	113.3E,23.1N	GLD			0	NH4NO3	6.40±0.21	2	21.9	1735	3	2.61 ± 0.21					1639.27±100.25(g m-2)			155±7.32(ug g-1)		860.02±63.75(g m-2)			43	35	22
[160]	113.3E,23.1N	GLD			10	NH4NO3	5.81±0.35	2	21.9	1735	3	2.34 ± 0.17					1589.14±133.67			135±9.03		874.5±84.76
[160]	113.3E,23.1N	GLD			20	NH4NO3	5.41±0.26	2	21.9	1735	3	2.16±0.22					1679.65±84.94			124±8.08		862.2±74.62
[160]	113.3E,23.1N	GLD			0	NH4NO3	6.40±0.21	3	21.9	1735	3						1726.99±110					899.14±83.31
[160]	113.3E,23.1N	GLD			10	NH4NO3	5.81±0.35	3	21.9	1735	3						1664.33±108.61					886.83±71.72
[160]	113.3E,23.1N	GLD			20	NH4NO3	5.41±0.26	3	21.9	1735	3						1726.99±101.65					889±56.51
[161]	121.65E,29.87N	SubTR-EF			0	NH4NO3	4.88±0.32	2	16	1374		2.516±0.3					71.98±18.46(g m-2)		0.18±0.02(%)
[161]	121.65E,29.87N	SubTR-EF			5	NH4NO3	4.96±0.29	2	16	1374		3.24±0.33					171.42±40.38		0.19±0.01
[161]	121.65E,29.87N	SubTR-EF			10	NH4NO3	4.2±0.05	2	16	1374		3.09±0.27					121.88±40.51		0.19±0.01
[162]	119E,37.758N	Wetland	2.8		0	NH4NO3		1	12.9	580	3	1.67±0.15						0.42±0.04(%)	0.06±0(%)			282.83±40.46(g m-2)
[162]	119E,37.758N	Wetland	2.8		5	NH4NO3		1	12.9	580	3	1.99±0.17						0.98±0.07	0.08±0.01			260.09±38.81
[162]	119E,37.758N	Wetland	2.8		10	NH4NO3		1	12.9	580	3	2.64±0.21						0.84±0.03	0.09±0			156.17±21.81
[163]	112.17E,23.17N	TR-CF	3.7		0	NH4NO3	3.94±0.08	1		1927	3	89±5							1.3±0.1(mg g-1)					685±46(g m-2)
[163]	112.17E,23.17N	TR-CF			5	NH4NO3		1		1927	3	71±4												600±49
[163]	112.17E,23.17N	TR-CF			10	NH4NO3		1		1927	3	80±4												664±49
[163]	112.17E,23.17N	mixed forest			0	NH4NO3	3.91±0.03	1		1927	3	66±4							1.2±0.1					464±33
[163]	112.17E,23.17N	mixed forest			5	NH4NO3		1		1927	3	63±3												651±40
[163]	112.17E,23.17N	mixed forest			10	NH4NO3		1		1927	3	61±3												605±43
[164]	121.65E,29.87N	SubTR-EF			0	NH4NO3	4.75	1	16.2	1374.7	3	2.52±0.29
[164]	121.65E,29.87N	SubTR-EF			5	NH4NO3		1	16.2	1374.7	3	1.82±0.23
[164]	121.65E,29.87N	SubTR-EF			10	NH4NO3		1	16.2	1374.7	3	2.6±0.28
[165]	115.7E,29.3N	SubTR-CF	4.3		0	NH4NO3	6.35±0.06	1	16.7	1469	3	3.91±0.22						15.52±0.66(g kg-1)	1.03±0.1	65.62±29.21(mg kg-1)	52.99±6.14
[165]	115.7E,29.3N	SubTR-CF	4.3		6	NH4NO3	6.156±0.04	1	16.7	1469	3	2.3±0.15								153.57±36.96	64.11±18.39
[165]	115.7E,29.3N	SubTR-CF	4.3		12	NH4NO3	6.07±0.06	1	16.7	1469	3	1.73±0.11								230.01 ±33.81	80.75±10.29
[166]	117.47E,26.2N	SubTR-EF	4		0	NH4NO3	4.08±0.06	3	18.7	1552	4	979.28±40.77						36.61±7.47(g kg-1)	2.67±0.27
[166]	117.47E,26.2N	SubTR-EF	4		4	NH4NO3	3.97±0.09	3	18.7	1552	4	1134.2±96.03						39.18±13.03	2.7±0.53
[166]	117.47E,26.2N	SubTR-EF	4		8	NH4NO3	3.95±0.09	3	18.7	1552	4	942.14±77.91						33.32±7.99	2.54±0.32
[166]	117.47E,26.2N	SubTR-EF	4		0	NH4NO3	4.08±0.06	4	18.7	2141	4	1070.78±14.5
[166]	117.47E,26.2N	SubTR-EF	4		4	NH4NO3	3.97±0.09	4	18.7	2141	4	1276.43±79.72
[166]	117.47E,26.2N	SubTR-EF	4		8	NH4NO3	3.95±0.09	4	18.7	2141	4	943.07±59.8
[166]	117.47E,26.2N	SubTR-EF	4		0	NH4NO3	4.08±0.06	5	18.7	2025	4	1049.946±69.75
[166]	117.47E,26.2N	SubTR-EF	4		4	NH4NO3	3.97±0.09	5	18.7	2025	4	1294.546±47.11
[166]	117.47E,26.2N	SubTR-EF	4		8	NH4NO3	3.95±0.09	5	18.7	2025	4	875.1±19.93
[167]	112E,36.75N	TE-CF			0	NH4NO3	6.91	2	6.2	600	3	3.4±0.26						26.86(mg g-1)	2.12
[167]	112E,36.75N	TE-CF			5	NH4NO3		2	6.2	600	3	2.87±0.24
[167]	112E,36.75N	TE-CF			10	NH4NO3		2	6.2	600	3	3.83±0.42
[167]	112E,36.75N	TE-CF			15	NH4NO3		2	6.2	600	3	4.7±0.43
[169]	100.25E,37.3N	GLD			0	NH4NO3	8.9±0.1	2	0.08	387	5	2.95±0.23	1.71±0.34	1.24±0.1	10.5±0.2	24.5±0.6				1237±93(mg kg-1)								126.9±10(g m-2)
[168]	100.25E,37.3N	GLD			1	NH4NO3	9.2±0.06	2	0.08	387	5	3.25±0.27	1.86±0.34	1.39±0.25	10.6±0.2	25.3±0.9				1296±83								142.2±17.8
[168]	100.25E,37.3N	GLD			2	NH4NO3	9.2±0.08	2	0.08	387	5	3.41±0.38	1.59±0.2	1.82±0.25	10.6±0.1	24.8±0.9				1289±89								152.4±13.9
[168]	100.25E,37.3N	GLD			4	NH4NO3	9.1±0.07	2	0.08	387	5	3.37±0.4	1.61±0.2	1.76±0.42	10.8±0.2	24.6±0.4				1241±99								186.7±13.9
[168]	100.25E,37.3N	GLD			8	NH4NO3	9.1±0.08	2	0.08	387	5	3.82±0.42	1.74±0.25	2.08±0.44	10.6±0.2	22.6±0.3				1354±76								256.6±14.3
[168]	100.25E,37.3N	GLD			16	NH4NO3	9.1±0.07	2	0.08	387	5	3.35±0.27	1.46±0.19	1.89±0.26	10.6±0.2	23.3±0.5				1326±91								241.2±21.4
[168]	100.25E,37.3N	GLD			24	NH4NO3	9±0.03	2	0.08	387	5	3.03±0.33	1.54±0.56	1.49±0.32	10.5±0.2	24.3±1.2				1255±92								271.7±26.1
[168]	100.25E,37.3N	GLD			32	NH4NO3	9.1±0.10	2	0.08	387	5	2.79±0.2	1.3±0.37	1.49±0.12	10.5±0.2	24.5±0.8				1287±95								284.9±27.6
[168]	100.25E,37.3N	GLD			0	NH4NO3	9.0±0.07	3	0.08	387	5	3.18±0.32	2.09±0.26	1.09±0.12	9.9±0.1	20.1±0.7				934±94								146.0±11.6
[168]	100.25E,37.3N	GLD			1	NH4NO3	9.1±0.06	3	0.08	387	5	3.28±0.37	2.28±0.13	1±0.18	9.9±0.2	20.3±0.9				945±137								146.8±8.3
[168]	100.25E,37.3N	GLD			2	NH4NO3	9.0±0.03	3	0.08	387	5	3.29±0.42	2.004±0.35	1.286±0.3	9.9±0.2	19.2±0.2				1088±137								175.7±14.7
[168]	100.25E,37.3N	GLD			4	NH4NO3	9.0±0.05	3	0.08	387	5	3.29±0.42	2.02±0.4	1.27±0.44	9.9±0.2	20.7±0.3				1208±121								180.4±13.6
[168]	100.25E,37.3N	GLD			8	NH4NO3	8.9±0.03	3	0.08	387	5	3.59±0.43	1.75±0.31	1.84±0.54	9.6±0.1	19.2±0.4				1052±94								265.1±23.5
[168]	100.25E,37.3N	GLD			16	NH4NO3	9.0±0.04	3	0.08	387	5	3.16±0.32	1.65±0.29	1.51±0.39	9.5±0.2	19.9±0.7				1028±125								287.5±21
[168]	100.25E,37.3N	GLD			24	NH4NO3	8.8±0.04	3	0.08	387	5	2.76±0.34	1.79±0.45	0.97±0.15	9.4±0	21.1±0.7				868±63								350.4±13.3
[168]	100.25E,37.3N	GLD			32	NH4NO3	8.8±0.05	3	0.08	387	5	2.87±0.376	1.73±0.18	1.14±0.17	9.5±0.1	21.5±0.8				1062±177								373.0±18.6
[169]	112.17E,23.17N	TR-EF	3.3		0	NH4NO3		2	21	1927	3	69±3					124±25(g cm-2)		2.5±0.2(mg g-1)	697.31±26.49(mg kg-1)				846±164(g m-2)
[169]	112.17E,23.17N	TR-EF	3.3		5	NH4NO3		2	21	1927	3	72±3					91±9			655±33.48				742±140
[169]	112.17E,23.17N	TR-EF	3.3		10	NH4NO3		2	21	1927	3	63±1					74±8			572.96±19.87				728±146
[169]	112.17E,23.17N	TR-EF	3.3		15	NH4NO3		2	21	1927	3	59±1					50±6			519.61±61.07				868±157
[170]	101.33E, 37.63N	GLD	1.1		0	NH4CL		3	-1.7	580	3	148.6±10.9										356.4±9.9(g m-2)
[170]	101.33E, 37.63N	GLD	1.1		1	NH4CL		3	-1.7	580	3	136.54±5										327.87±13.18
[170]	101.33E, 37.63N	GLD	1.1		2	NH4CL		3	-1.7	580	3	146.8±6.52										377.94±16.61
[170]	101.33E, 37.63N	GLD	1.1		4	NH4CL		3	-1.7	580	3	158.22±2.34										404.18±17.87
[170]	101.33E, 37.63N	GLD	1.1		1	(NH4)2SO4		3	-1.7	580	3	142.33±3.53										361.84±19.52
[170]	101.33E, 37.63N	GLD	1.1		2	(NH4)2SO4		3	-1.7	580	3	164.3±9.52										397.34±9.13
[170]	101.33E, 37.63N	GLD	1.1		4	(NH4)2SO4		3	-1.7	580	3	164.71±2.55										374.27±18.51
[170]	101.33E, 37.63N	GLD	1.1		1	KNO3		3	-1.7	580	3	140.93±3.47										355.88±11.54
[170]	101.33E, 37.63N	GLD	1.1		2	KNO3		3	-1.7	580	3	151.49±3.47										365.39±16.1
[170]	101.33E, 37.63N	GLD	1.1		4	KNO3		3	-1.7	580	3	148.2±3.74										382.76±21.17
[170]	101.33E, 37.63N	GLD	1.1		1	NH4CL		4	-1.7	580	3	148.6±5.68										438.32±26.77
[170]	101.33E, 37.63N	GLD	1.1		2	NH4CL		4	-1.7	580	3	154.53±3.59										376.12±19.64
[170]	101.33E, 37.63N	GLD	1.1		4	NH4CL		4	-1.7	580	3	170.14±5.23										376.47±23.38
[170]	101.33E, 37.63N	GLD	1.1		1	(NH4)2SO4		4	-1.7	580	3	150.94±4.31										451.29±35.42
[170]	101.33E, 37.63N	GLD	1.1		2	(NH4)2SO4		4	-1.7	580	3	173.07±8.34										394.36±29.58
[170]	101.33E, 37.63N	GLD	1.1		4	(NH4)2SO4		4	-1.7	580	3	169.6±4.87										423.82±39.16
[170]	101.33E, 37.63N	GLD	1.1		1	KNO3		4	-1.7	580	3	146.45±4.66										432.47±35.54
[170]	101.33E, 37.63N	GLD	1.1		2	KNO3		4	-1.7	580	3	158±4.72										454.57±53.43
[170]	101.33E, 37.63N	GLD	1.1		4	KNO3		4	-1.7	580	3	157.49±6.37										443.46±21.74
[171]	102.98E,29.97N	TE-EF			0	NH4NO3		1	16.1	1772.2	3	0.44±0.05								0.22±0.02(g kg-1)	0.03±0.015
[171]	102.98E,29.97N	TE-EF			5	NH4NO3		1	16.1	1772.2	3	0.53±0.09								0.25±0.02	0.032±0.015
[171]	102.98E,29.97N	TE-EF			15	NH4NO3		1	16.1	1772.2	3	0.66±0.1								0.26±0.02	0.038±0.017
[171]	102.98E,29.97N	TE-EF			30	NH4NO3		1	16.1	1772.2	3	0.72±0.11								0.32±0.02	0.04±0.01
[172]	106.37E,29.75N	SubTR-CF			0	NH4NO3	4.34	1	13.6	1161.8	9	13.9±1.56			20.77±0.78	21.33±1.96		23.64	3.18(g kg-1)						88.17	4.81	7.02
[172]	106.37E,29.75N	SubTR-CF			20	NH4NO3		1	13.6	1161.8	9	13.77±2.67			20.92±0.82	21.51±1.755
[172]	106.37E,29.75N	SubTR-CF			40	NH4NO3		1	13.6	1161.8	9	13.47±2.56			20.88±0.59	21.51±1.535
[172]	106.37E,29.75N	SubTR-CF			60	NH4NO3		1	13.6	1161.8	9	12.89±2.41			21.08±0.73	21.59±1.39
[173]	113.1E, 28.05	SubTR-CF			0	NH4NO3		2	17.2	1450	1	5.28±1.02
[173]	113.1E, 28.05	SubTR-CF			5	NH4NO3		2	17.2	1450	3	4.51±0.64
[173]	113.1E, 28.05	SubTR-CF			15	NH4NO3		2	17.2	1450	3	4.66±0.51
[173]	113.1E, 28.05	SubTR-CF			30	NH4NO3		2	17.2	1450	3	4.2±0.43
[174]	112.15E, 36.6N	TE-CF	2.12		0	NH4NO3	7.26±0.18	5	9.9	662	3	2.16±0.32	1.73±0.17	0.43±0.15	11.37±0.17	32.85±0.38	80±5.6(g m-2)	30.41±3.07(g kg-1)	1.69±0.16	447.59±22.89(mg kg-1)
[174]	112.15E, 36.6N	TE-CF	2.12		5	NH4NO3	6.61±0.15	5	9.9	662	3	2.05±0.27	1.44±0.15	0.61±0.12	11.20±0.17	31.96±0.40	128.42±14.65	28.07±5.25	1.69±0.20	411.84±16.3
[174]	112.15E, 36.6N	TE-CF	2.12		10	NH4NO3	6.24±0.17	5	9.9	662	3	1.9±0.26	1.23±0.13	0.67±0.13	11.01±0.16	31.18±0.37	133.08±6.56	30.90±3.25	1.65±0.11	378.92±22.58
[174]	112.15E, 36.6N	TE-CF	2.12		0	NH4NO3	7.64±0.33	5	9.9	662	3	2.21±0.36	1.79±0.25	0.42±0.11	12.83±0.29	31.67±0.59	31.02±3.14	17.82±2.54	1.57±0.31	355.09±16.93
[174]	112.15E, 36.6N	TE-CF	2.12		5	NH4NO3	7.72±0.25	5	9.9	662	3	3.27±0.51	1.53±0.2	1.74±0.31	12.48±0.28	30.49±0.57	53.18±3.8	22.77±4.25	1.43±0.21	301.47±18.81
[174]	112.15E, 36.6N	TE-CF	2.12		10	NH4NO3	6.84±0.40	5	9.9	662	3	1.89±0.25	1.46±0.16	0.43±0.09	12.91±0.30	31.08±0.52	32.93±7.8	27.63±4.72	1.38±0.09	298.96±16.62
[175]	112.85E,29.53N	SubTR-DF	2.6		0	NH4NO3		1	16.75	1307.65	3	1.22±0.34
[175]	112.85E,29.53N	SubTR-DF	2.6		5	NH4NO3		1	16.75	1307.65	3	0.96±0.14
[175]	112.85E,29.53N	SubTR-DF	2.6		10	NH4NO3		1	16.75	1307.65	3	0.83±0.15
[175]	112.85E,29.53N	SubTR-DF	2.6		20	NH4NO3		1	16.75	1307.65	3	1.12±0.14
[175]	112.85E,29.53N	SubTR-DF	2.6		0	NH4NO3		2	16.75	1307.65	3	2.73±0.12
[175]	112.85E,29.53N	SubTR-DF	2.6		5	NH4NO3		2	16.75	1307.65	3	2.95±0.33
[175]	112.85E,29.53N	SubTR-DF	2.6		10	NH4NO3		2	16.75	1307.65	3	2.6±0.31
[175]	112.85E,29.53N	SubTR-DF	2.6		20	NH4NO3		2	16.75	1307.65	3	2.5±0.22
[176]	86.89W,36.12N	GLD			0			1	15	1200	4	3.77±0.09			23.45±0.31
[176]	86.89W,36.12N	GLD			1.7			1	15	1200	4	4.05±0.09			23.63±0.32
[176]	86.89W,36.12N	GLD			3.4			1	15	1200	4	4.71±0.09			23.42±0.32
[176]	86.89W,36.12N	GLD			6.7			1	15	1200	4	4.71±0.11			23.52±0.32
[177]	102.9E,31.8N	TE-CF	0.1		0	NH4NO3		1			3	1±0.345	0.54±0.15	0.46±0.19						55.87±12.01(mg kg-1)	24.19±7.56
[177]	102.9E,31.8N	TE-CF	0.1		2	NH4NO3		1			3	1.15±0.05	0.72±0.05	0.43±0.05						120.08±19.52	52.97±10.73
[177]	102.9E,31.8N	TE-CF	0.1		5	NH4NO3		1			3	0.96±0.12	0.62±0.05	0.34±0.13						133.94±9.35	43.7±4.88
[177]	102.9E,31.8N	TE-CF	0.1		10	NH4NO3		1			3	0.92±0.14	0.64±0.03	0.28±0.1						139.14±14.78	39.06±2.03
[178]	102.98E,30.05N	SubTR-EF			0	NH4NO3	6.53±0.02	2	16.2	1700	3	1.55±0.05			12.0±0.2	27.9±0.7	165.43±14.63(g m-2)		1.14±0.13(g kg-1)	663.3±27.58(mg kg-1)	57.23±3.58
[178]	102.98E,30.05N	SubTR-EF			5	NH4NO3	6.315±0.01	2	16.2	1700	3	1.41±0.12			12.1±0.5	28.1±0.9	138.68±15.3			592.12±30.746	52.69±4.57
[178]	102.98E,30.05N	SubTR-EF			15	NH4NO3	6.24±0.03	2	16.2	1700	3	1.31±0.09			12.1±0.3	27.9±1.0	121.89±11.14			587.82±39.55	49.08±2.37
[178]	102.98E,30.05N	SubTR-EF			30	NH4NO3	6.19±0.01	2	16.2	1700	3	1.20±0.07			12.0±0.4	27.9±0.8	94.26±12.33			504.19±21.52	42.95±2.8
[180]	114.25E,28.7N	SubTR-EF			0	NH4NO3	5.11±0.01	2	13.5	1900	3	2.11±0.27							0.36±0.01(%)				730.62±46.04(kg ha-1)	1981±356.59(kg ha-1)
[179]	114.25E,28.7N	SubTR-EF			2	NH4NO3		2	13.5	1900	3	2.44±0.29											869.5±224.93	2685.43±309.39
[179]	114.25E,28.7N	SubTR-EF			5	NH4NO3		2	13.5	1900	3	2.03±0.26											996.31±291.35	2438.97±118.86
[179]	114.25E,28.7N	SubTR-EF			10	NH4NO3		2	13.5	1900	3	2.02±0.25											1179.73±237.76	2297.38±457.97
[179]	114.25E,28.7N	SubTR-EF			0	NH4NO3		3	13.5	1900	3	2.25±0.38
[179]	114.25E,28.7N	SubTR-EF			2	NH4NO3		3	13.5	1900	3	2.5±0.38
[179]	114.25E,28.7N	SubTR-EF			5	NH4NO3		3	13.5	1900	3	2.08±0.29
[179]	114.25E,28.7N	SubTR-EF			10	NH4NO3		3	13.5	1900	3	2.09±0.32
[180]	113.05E,28.05N	SubTR-EF			0	NH4NO3		1	17.2	1450	3	4.09±0.66
[180]	113.05E,28.05N	SubTR-EF			5	NH4NO3		1	17.2	1450	3	2.39±0.29
[180]	113.05E,28.05N	SubTR-EF			15	NH4NO3		1	17.2	1450	3	2.18±0.19
[180]	113.05E,28.05N	SubTR-EF			30	NH4NO3		1	17.2	1450	3	2.28±0.25
[181]	103.8E,28.6N	SubTR-EF			0	NH4NO3	3.44±0.06	1	12.8	1780	3	612.21±77.82						116.59±1.65(g kg-1)	3.37±0.11
[181]	103.8E,28.6N	SubTR-EF			5	NH4NO3		1	12.8	1780	3	638.19±116.70
[181]	103.8E,28.6N	SubTR-EF			10	NH4NO3		1	12.8	1780	3	587.08±125.90
[181]	103.8E,28.6N	SubTR-EF			15	NH4NO3		1	12.8	1780	3	570.85±111.45
[182]	103.67E, 30.58N	SubTR-EF	8.241		0	NH4NO3		1	15	1489.8	3	2.16±0.44								0.186±0.02(g kg-1)	0.015±0.003
[182]	103.67E, 30.58N	SubTR-EF	8.241		5	NH4NO3		1	15	1489.8	3	2.86±0.66								0.215±0.01	0.02±0.0008
[182]	103.67E, 30.58N	SubTR-EF	8.241		15	NH4NO3		1	15	1489.8	3	2.93±1.15								0.22±0.007	0.02±0.003
[182]	103.67E, 30.58N	SubTR-EF	8.241		30	NH4NO3		1	15	1489.8	3	5.39±1.19								0.23±0.003	0.023±0.002
[183]	103.63E,30.58N	SubTR-DF			0	NH4NO3	4.88±0.15	2	15	1489.8	3	584.2						9.18±1.53(g kg-1)	1.54±0.21
[183]	103.63E,30.58N	SubTR-DF			5	NH4NO3		2	15	1489.8	3	422.961
[183]	103.63E,30.58N	SubTR-DF			15	NH4NO3		2	15	1489.8	3	374.472
[183]	103.63E,30.58N	SubTR-DF			30	NH4NO3		2	15	1489.8	3	305.537
[184]	113E,28.1N	SubTR-EF			0	NH4NO3	3.98±0.22	1	17.4	1450	3	3.15±0.37						13.97±1.7(mg g-1)	1.34±0.14
[184]	113E,28.1N	SubTR-EF			5	NH4NO3		1	17.4	1450	3	1.84±0.23
[184]	113E,28.1N	SubTR-EF			15	NH4NO3		1	17.4	1450	3	1.9±0.21
[184]	113E,28.1N	SubTR-EF			30	NH4NO3		1	17.4	1450	3	1.96±0.21
[185]	107.95E, 25.15N	SubTR-EF	3.7		0	NH4NO3		4	1.9	1400	3	19.08±3.03
[185]	107.95E, 25.15N	SubTR-EF			5	NH4NO3		4	1.9	1400	3	30.81±13.74
[185]	107.95E, 25.15N	SubTR-EF			10	NH4NO3		4	1.9	1400	3	44.91±10.17
[185]	107.95E, 25.15N	SubTR-EF			0	NH4NO3		4	1.9	1400	3	69.2±37.46
[185]	107.95E, 25.15N	SubTR-EF			5	NH4NO3		4	1.9	1400	3	28.49±13.91
[185]	107.95E, 25.15N	SubTR-EF			10	NH4NO3		4	1.9	1400	3	33.85±23.9
[186]	118.95E, 37.6N	Wetland	2.1		0	NH4NO3		8	13	560	5	0.99±0.06	0.45±0.04	0.54±0.41	16.89±1.1	41.17±7.12				51.96±8.68(mg g-1)		5.22±0.82(g m-2)	445.13±41.45
[186]	118.95E, 37.6N	Wetland			5	NH4NO3		8	13	560	5	1.27±0.08	0.59±0.04	0.68±0.04	14.68±1.13	44.11±4.01				277.7±7.79		6.59±0.53	550.97±67.03
[186]	118.95E, 37.6N	Wetland			10	NH4NO3		8	13	560	5	1.27±0.07	0.57±0.03	0.7±0.04	14.57±1	38.33±2.64				242.97±18.64		7.05±0.73	655.97±37.04
[186]	118.95E, 37.6N	Wetland			20	NH4NO3		8	13	560	5	1.22±0.08	0.57±0.04	0.65±0.05	14.98±0.93	42.74±2.84				303.75±9.7		6.16±0.65	528.92±37.93
[187]	116.67E,43.53N	GLD			0	NH4NO3	7.95±0.07	1	1	341	3	153.3±2.31					1584.63±40.02(g m-2)	18.97±0.41(g kg-1)	1.8±0.09	455.9±18.51(mg kg-1)					60	19	21
[187]	116.67E,43.53N	GLD			2.5	NH4NO3		1	1	341	3	173.29±8.71					1598.64±32.01			463.41±13.51
[187]	116.67E,43.53N	GLD			5	NH4NO3		1	1	341	3	159.96±4.61					1566.62±32.01			452.4±15
[187]	116.67E,43.53N	GLD			10	NH4NO3		1	1	341	3	166.37±6.67					1628.65±18.0			471.41±14
[187]	116.67E,43.53N	GLD			0	NH4NO3		2	1	341	3	131.26±6.4					1930.79±88.04			446.4±12.51
[187]	116.67E,43.53N	GLD			2.5	NH4NO3		2	1	341	3	137.92±8.97					1908.78±72.03			479.91±14
[187]	116.67E,43.53N	GLD			5	NH4NO3		2	1	341	3	126.65±5.12					2012.83±60.03			451.4±12.51
[187]	116.67E,43.53N	GLD			10	NH4NO3		2	1	341	3	125.37±6.92					1980.81±172.08			468.41±14.51
[187]	116.67E,43.53N	GLD			0	NH4NO3		3	1	341	3	111.27±5.64					1762.71±60.03			420.89±15.51
[187]	116.67E,43.53N	GLD			2.5	NH4NO3		3	1	341	3	113.58±2.31					1820.74±60.03			468.41±17.51
[187]	116.67E,43.53N	GLD			5	NH4NO3		3	1	341	3	105.63±6.92					2026.83±116.05			432.39±25
[187]	116.67E,43.53N	GLD			10	NH4NO3		3	1	341	3	106.91±5.64					2152.89±54.02			411.88±13
[187]	116.67E,43.53N	GLD			0	NH4NO3		4	1	341	3	69.50±3.84					1914.78±40.02			325.34±14.51
[187]	116.67E,43.53N	GLD			2.5	NH4NO3		4	1	341	3	63.09±8.97					2076.86±140.06			281.82±11
[187]	116.67E,43.53N	GLD			5	NH4NO3		4	1	341	3	78.73±3.84					2230.93±80.04			289.83±11
[187]	116.67E,43.53N	GLD			10	NH4NO3		4	1	341	3	72.06±5.64					2264.94±94.04			256.81±13
[188]	80.03W,41.6N	TE-DF	1		0	NH4NO3		9	9.75	1125	3	1097.1±99.2										593			75	23	2
[188]	80.03W,41.6N	TE-DF	1		10	NH4NO3		9	9.75	1125	3	1042.9±47.8
[188]	80.03W,41.6N	TE-DF	1		0	NH4NO3		10	9.75	1125	3	1366.7±82.8
[188]	80.03W,41.6N	TE-DF	1		10	NH4NO3		10	9.75	1125	3	1287.5±19.8
[189]	65.8W,18.3N	TR-EF	0.21		0	NH4NO3		1	23	3537	3	495.69±63.17
[189]	65.8W,18.3N	TR-EF			5	NH4NO3		1	23	3537	3	367.79±69.4
[189]	65.8W,18.3N	TR-EF			0	NH4NO3		1	21	4300	3	507.8±58.12
[189]	65.8W,18.3N	TR-EF			5	NH4NO3		1	21	4300	3	360.19±69.19
[190]	79.67W,39.03N	TE-DF	1.75		0	(NH4)2SO4	4.52	25	9.3	1460	3	982±63					121±32(g m-2)							162±2(g m-2)				565±25(g m-2)
[190]	79.67W,39.03N	TE-DF			3.5	(NH4)2SO4		25	9.3	1460	3	864±28					110±30							156±3				709±43
[191]	8.73E, 47.05N	TE-CF	1.2		0	NH4NO3	4.9±0.3	20	6	2300	5		199±39				8.1±2.5(g m-3)			3.79±0.56(mg g-1)	647±83(mg kg-1)
[191]	8.73E, 47.05N	TE-CF	1.2		2.2	NH4NO3	4.9±0.3	20	6	2300	5		175±32				5.4±1.7			2.98±0.41	588±77
[192]	19.77E, 64.35N	B-CF	0.2			NH4NO3	4.3±0	20	1.2	595	3	104.6±13.5							20.5±3.6(g m-2)
[192]	19.77E, 64.35N	B-CF				NH4NO3	4.4±0.1	20	1.2	595	3	81.9±12.4							31.7±4
[192]	19.77E, 64.35N	B-CF				NH4NO3	4.3±0	38	1.2	595	3	89.6±11.9							37.9±6.6
[192]	19.77E, 64.35N	B-CF				NH4NO3	4.2±0	20	1.2	595	3	89.9±4.8							46.7±1.9
[193]	93.2W, 45.4N	GLD			0	NH4NO3	5.7±0.04	12	7.2	744	3	118.1±16				6.3±0.42	193.39±18.27	0.71±0.07(%)	0.06±0.01	97.15±10.26	18.93±1.65
[193]	93.2W, 45.4N	GLD			10	NH4NO3	5.17±0.06	12	7.2	744	3	121.75±14.39				5.24±0.43	325.77±62.2	0.7±0.03	0.06±0.0	71.67±4.51	11.88±1.58
[193]	93.2W, 45.4N	GLD			0	NH4NO3	5.62±0.07	12	7.2	744	3	127.43±8.17				5.91±0.36	386.23±62.03	0.67±0.05	0.06±0.01	117.41±8.56	20.31±1.43
[193]	93.2W, 45.4N	GLD			10	NH4NO3	4.99±0.11	12	7.2	744	3	88.78±4.71				4.58±0.27	278.01±84.58	0.74±0.02	0.06±0.0	57.79±9.04	10.46±0.66
[193]	93.2W, 45.4N	TE-DF			0	NH4NO3	5.5±0.08	12	7.2	744	3	105.57±8				8.46±0.31	365.95±106.78	1.55±0.11	0.09±0.01	155.69±10.86	32.78±1.95
[193]	93.2W, 45.4N	TE-DF			10	NH4NO3	5.28±0.07	12	7.2	744	3	120.32±9.6				8.52±0.29	294.38±26.45	1.7±0.09	0.1±0.01	188.45±0.29	37.01±1.42
[193]	93.2W, 45.4N	TE-DF			0	NH4NO3	5.41±0.05	12	7.2	744	3	103.97±13.33				9.17±0.39	272.15±17.22	1.98±0.21	0.1±0.01	194.18±8.39	38.13±1.97
[193]	93.2W, 45.4N	TE-DF			10	NH4NO3	5.12±0.12	12	7.2	744	3	105.66±10.84				9.63±0.3	546.63±53.37	2.19±0.13	0.12±0	251.19±22.94	42.1±2.67
[193]	93.2W, 45.4N	TE-DF			0	NH4NO3	5.08±0.04	12	7.2	744	3	70.92±9.6				9.313±0.68	275.07±29.35	1.86±0.27	0.11±0.01	175.87±12.46	35.43±2.47
[193]	93.2W, 45.4N	TE-DF			10	NH4NO3	4.98±0.06	12	7.2	744	3	60.35±5.6				7.52±0.44	214.48±28.74	1.72±0.17	0.1±0.01	132.48±19.15	24.6±2.8
[193]	93.2W, 45.4N	TE-DF			0	NH4NO3	5.3±0.1	12	7.2	744	3	82.83±7.73				7.21±0.42	185.94±17.43	1.59±0.11	0.1±0.01	158.45±3.95	30.91±1.17
[193]	93.2W, 45.4N	TE-DF			10	NH4NO3	4.97±0.05	12	7.2	744	3	83.63±15.02				7.53±0.58	277.17±35.78	1.53±0.12	0.09±0.01	168.56±17.23	32.65±3.44
[193]	93.2W, 45.4N	TE-CF			0	NH4NO3	5.57±0.04	12	7.2	744	3	89.85±5.77				4.43±0.1	85.78±8.55	1.08±0.01	0.06±0	84.31±8.6	13.56±1.2
[193]	93.2W, 45.4N	TE-CF			10	NH4NO3	5.45±0.05	12	7.2	744	3	99.18±4.17				4.87±0.32	181.11±31.31	1.44±0.09	0.07±0.01	107.79±8.26	19.06±1.87
[193]	93.2W, 45.4N	TE-CF			0	NH4NO3	5.17±0.07	12	7.2	744	3	80.61±6.13				7.17±0.99	114.33±29.89	2.13±0.22	0.12±0.01	127.86±17.55	24.67±3.7
[193]	93.2W, 45.4N	TE-CF			10	NH4NO3	4.99±0.09	12	7.2	744	3	86.65±4.71				7.93±0.8	200.77±48.11	2.06±0.15	0.12±0.01	129.7±14.8	23.9±3.57
[194]	110.9W, 56.1N	B-DF	1		0	NH4NO3	4.48±0.11	10	1	418.6	1	39.3±6.9							0.35±0.02(g kg-1)	53.3±4.4(mg kg-1)	5.8±0.6
[194]	110.9W, 56.1N	B-DF			3	NH4NO3	4.38±0.08	10	1	418.6	1	35.3±11.6							0.4±0.06	54.6±7.8	5.8±1.2
[195]	13.253E, 50.591N	TE-CF			0	NH4NO3	3.68±0.02	2	6.5	1092	4	3.92±0.3
[195]	13.253E, 50.591N	TE-CF			5	NH4NO3	3.64±0.02	2	6.5	1092	4	3.85±0.28
[195]	13.253E, 50.591N	TE-CF			0	NH4NO3	3.84±0.04	3	6.5	1092	4	3.28±0.3
[195]	13.253E, 50.591N	TE-CF			5	NH4NO3	3.76±0.03	3	6.5	1092	4	3.5±0.32
[195]	13.253E, 50.591N	TE-CF			0	NH4NO3	3.71±0.06	4	6.5	1092	4	3.15±0.37
[195]	13.253E, 50.591N	TE-CF			5	NH4NO3	3.59±0.04	4	6.5	1092	4	3.16±0.32
[195]	13.267E, 50.589N	TE-CF			0	NH4NO3	4.03±0.03	2	6.5	1092	4	3.79±0.32
[195]	13.267E, 50.589N	TE-CF			5	NH4NO3	4±0.04	2	6.5	1092	4	3.67±0.27
[195]	13.267E, 50.589N	TE-CF			0	NH4NO3	4.14±0.04	3	6.5	1092	4	3.56±0.37
[195]	13.267E, 50.589N	TE-CF			5	NH4NO3	4.08±0.04	3	6.5	1092	4	3.42±0.38
[195]	13.267E, 50.589N	TE-CF			0	NH4NO3	4.12±0.04	4	6.5	1092	4	2.94±0.28
[195]	13.267E, 50.589N	TE-CF			5	NH4NO3	4.06±0.07	4	6.5	1092	4	2.73±0.27
[196]	93.2W, 45.4N	GLD	0.7		0	mixed N	5.5±0	5	6.3	750	5	1.29±0.08							0.83±0.07(g kg-1)	255.21±17.27(mg kg-1)	43.87±2.99				90.1	5.6	4.3
[196]	93.2W, 45.4N	GLD			10	mixed N	5.2±0	5	6.3	750	5	1.19±0.1							1.08±0.13	271.45±22.76	54.27±4.92
[196]	101.63W, 41.2	GLD	0.31		0	mixed N	6.4±0.1	5	9.3	454	3	1.77±0.08							1.35±0.1	305.87±25.63	43.49±3.63				71.4	18.1	10.5
[196]	101.63W, 41.2	GLD			10	mixed N	6.2±0.1	5	9.3	454	3	1.37±0.12							1.24±0.11	252.57±26.96	42.24±4.93
[196]	93.39W, 41.79N	GLD	1.8		0	mixed N	6.4±0.1	3	9	855	6	0.89±0.04							0.67±0.02	148.8±6.33	25.56±0.93				87.5	7.4	5.1
[196]	93.39W, 41.79N	GLD			10	mixed N	6.3±0.1	3	9	855	6	0.89±0.04							0.73±0.03	180.45±15.79	50.4±14.09
[196]	95.58W, 39.07N	GLD	0.98		0	mixed N	6.2±0.1	5	12	872	3	2.37±0.11							3.05±0.08	581.31±34.16	102.6±4.81				31.9	49.8	18.3
[196]	95.58W, 39.07N	GLD			10	mixed N	6.1±0.1	5	12	872	3	1.69±0.15							3.02±0.1	490.44±18.84	91.91±4.76
[196]	104.77W, 40.82N	GLD	0.31		0	mixed N	5.7±0.1	5	8.4	364	3	1±0.05							0.87±0.04	152.44±16.41	26.39±1.66				71.3	15.1	13.6
[196]	104.77W, 40.82N	GLD			10	mixed N	5.4±0.1	5	8.4	364	3	0.97±0.05							1±0.04	139.76±10.62	22.37±2.24
[197]	29.4E,30.43S	GLD			0	NH4NO3	5.4±0.3	66	18	790	3								3±0.1(g kg-1)	888.077±72.77(mg kg-1)					5	46	49
[197]	29.4E,30.43S	GLD			7	NH4NO3	4.9±0.2	66	18	790	3								3.2±0.4	577.49±57.38
[197]	29.4E,30.43S	GLD			14	NH4NO3	4.7±0.4	66	18	790	3								3.3±0.2	516.55±46.14
[197]	29.4E,30.43S	GLD			21	NH4NO3	4.1±0.3	66	18	790	3								3.5±0.1	181.12±44.96
[198]	155.05W, 52.03N	TE-CF			0	NH4NO3	5.6±0.1	3		660	3	37.5±1.2
[198]	155.05W, 52.03N	TE-CF			18.8	NH4NO3	5.4±0.1	3		660	3	31.8±2.1
[199]	Lower Michigan	TE-DF			0	NaNO3		1	7.2	8100	3	24.8±2.4
[199]	Lower Michigan	TE-DF			3	NaNO3		1	7.2	8100	3	28.5±2.7
[199]	Lower Michigan	TE-DF			8	NaNO3		1	7.2	8100	3	40.3±4.3
[199]	Lower Michigan	TE-DF			0	NaNO3		1	7.2	8100	3	24.1±1.1
[199]	Lower Michigan	TE-DF			3	NaNO3		1	7.2	8100	3	27±2.7
[199]	Lower Michigan	TE-DF			8	NaNO3		1	7.2	8100	3	29.2±2.1
[199]	Lower Michigan	TE-DF			0	NaNO3		1	7.2	8100	3	38.8±4.7
[199]	Lower Michigan	TE-DF			3	NaNO3		1	7.2	8100	3	38.8±5
[199]	Lower Michigan	TE-DF			8	NaNO3		1	7.2	8100	3	32.8±2
[200]	93W, 45N	GLD			0	NH4NO3	5.41	15	5.7	660	32	0.27±0.02
[200]	93W, 45N	GLD			4	NH4NO3		15	5.7	660	32	0.29±0.02
[200]	93W, 45N	GLD			0	NH4NO3		15	5.7	660	15	0.41±0.03
[200]	93W, 45N	GLD			4	NH4NO3		15	5.7	660	15	0.42±0.03
[200]	93W, 45N	GLD			0	NH4NO3		15	5.7	660	15	0.41±0.03
[200]	93W, 45N	GLD			4	NH4NO3		15	5.7	660	15	0.42±0.03
[200]	93W, 45N	GLD			0	NH4NO3		15	5.7	660	12	0.43±0.03
[200]	93W, 45N	GLD			4	NH4NO3		15	5.7	660	12	0.51±0.03
[201]	104.5E, 27.75N	subTR-EF		221.24±36.28(mg kg-1)	0	NH4NO3	4±0.35	3	16	1600	3	2971±597	1499±56	1472±579					2.21±0.47(g kg-1)					1696±509				1742±399	705±149
[201]	104.5E, 27.75N	subTR-EF			5	NH4NO3		3	16	1600	3	2817±563	1810±340	1008±361										1498±354				1067±493	907±302
[201]	104.5E, 27.75N	subTR-EF			10	NH4NO3		3	16	1600	3	3039±324	1737±282	1303±422										1594±545				1581±362	915±367
[201]	104.5E, 27.75N	subTR-EF			5	NH4NO3		3	16	1600	3	3141±854	1614±532	1527±887										1744±922				1685±502	724±134
[201]	104.5E, 27.75N	subTR-EF			10	NH4NO3		3	16	1600	3	3227±356	1880±186	1348±476										1756±595				1336±1092	716±205
[202]	113.5E,23.33N	subTR-EF			0	NH4NO3		2	21.5	1750	3	1.83±0.03				20.62±4.50
[202]	113.5E,23.33N	subTR-EF			10	NH4NO3		2	21.5	1750	3	1.97±0.10				19.67±5.01
[202]	113.5E,23.33N	subTR-EF			0	NH4NO3		3	21.5	1750	3	3.45±0.07				20.17±6.6
[202]	113.5E,23.33N	subTR-EF			10	NH4NO3		3	21.5	1750	3	3.53±0.10				18.31±6.57
[202]	113.5E,23.33N	subTR-EF			0	NH4NO3		4	21.5	1750	3	3.62±0.01				20.58±6.88
[202]	113.5E,23.33N	subTR-EF			10	NH4NO3		4	21.5	1750	3	3.60±0.05				18.49±7.07
[202]	113.5E,23.33N	subTR-EF			0	NH4NO3	4.79±0.11	5	21.5	1750	3							7.733±2.011(g kg-1)		251±26.72(mg kg-1)
[202]	113.5E,23.33N	subTR-EF			10	NH4NO3	4.63±0.04	5	21.5	1750	3							10.126±1.936		183.41±31.4
[203]	113.5E,23.33N	subTR-EF			0	NH4NO3		5	21.5	1714	3	2.69±0.13			21.29±0.77	20.57±0.89						1.93±0.09	5.61±0.11(kg m-2)
[203]	113.5E,23.33N	subTR-EF			10	NH4NO3		5	21.5	1714	3	2.89±0.18			21.26±0.79	18.03±0.89						2.81±0.21	9.28±0.63
[204]	115.23E, 26.9N	subTR-CF			0	NH4NO3	4.4±0.01	5	17.9	1471.2	3							19±0.36	1.2±0.04 (g kg-1)
[204]	115.23E, 26.9N	subTR-CF			5	NH4NO3	4.2±0.03	5	17.9	1471.2	3							16.4±0.91	1.1±0.04
[204]	115.23E, 26.9N	subTR-CF			10	NH4NO3	4.2±0.01	5	17.9	1471.2	3							18.5±1.28	1.2±0.03
[205]	112.325E,40N	GLD			0	NH4NO3	9.36±0.17	1	4.6	426	6	2.74±0.15
[205]	112.325E,40N	GLD			10	NH4NO3	9.45±0.22	1	4.6	426	6	2.87±0.26
[205]	112.325E,40N	GLD			10	(NH4)2SO4	9.04±0.19	1	4.6	426	6	2.66±0.08
[205]	112.325E,40N	GLD			10	NH4HCO3	9.1±0.07	1	4.6	426	6	2.92±0.09
[205]	112.325E,40N	GLD			0	NH4NO3	8.75±0.09	2	4.6	426	6	1.88±0.16
[205]	112.325E,40N	GLD			10	NH4NO3	8.79±0.08	2	4.6	426	6	2.5±0.18
[205]	112.325E,40N	GLD			10	(NH4)2SO4	8.76±0.14	2	4.6	426	6	2.5±0.14
[205]	112.325E,40N	GLD			10	NH4HCO3	8.7±0.1	2	4.6	426	6	2.45±0.15
[205]	112.325E,40N	GLD			0	NH4NO3	9.47±0.11	3	4.6	426	6	2.82±0.146
[205]	112.325E,40N	GLD			10	NH4NO3	9.17±0.06	3	4.6	426	6	3.43±0.09
[205]	112.325E,40N	GLD			10	(NH4)2SO4	9.2±0.1	3	4.6	426	6	3.16±0.12
[205]	112.325E,40N	GLD			10	NH4HCO3	9.24±0.14	3	4.6	426	6	3.19±0.09
[206]	109.8E,26.9N	SubTR-CF			0	NH4NO3		1	16.5	1200	3	1.5±0.21	0.72±0.02	0.78±0.2
[206]	109.8E,26.9N	SubTR-CF			10	NH4NO3		1	16.5	1200	3	1.34±0.04	0.48±0.01	0.87±0.04
[207]	127.55E,45.4N	TE-CF			0	NH4NO3	6.12±0.15	6	2.8	723	3	1.18±0.06						98.17±4.29(g kg-1)	7.23±0.16	9.78±0.54(mg kg-1)	143.56±5.76
[207]	127.55E,45.4N	TE-CF			10	NH4NO3	5.15±0.16	6	2.8	723	3	1.05±0.08						100.45±9.22	7.15±0.15	7.64±0.41	65.68±6.2
[208]	127.63E,42.7N	TE-CF	2.7		0	NH4NO3		6	4	750	3	355.97±25													16.9	35.6	47.5
[208]	127.63E,42.7N	TE-CF			2.5	NH4NO3		6	4	750	3	268.49±41.65
[208]	127.63E,42.7N	TE-CF			7.5	NH4NO3		6	4	750	3	353.19±37.5
[209]	115.1E, 36.87N	GLD	2	17.4±1.1(mg kg-1)	0	NH4NO3	6.6±0.13	1	15.2	1120	3	4.65±0.34	3.14±0.5	1.51±0.09	15.2±0.6	40.0±0.6	217±25(g m-2)			803±116(mg kg-1)	100±15				12	38	50
[209]	115.1E, 36.87N	GLD		23.3±2.0	5	NH4NO3	6.4±0.05	1	15.2	1120	3	3.84±4.08	2.55±0.26	1.29±0.13	15.2±0.3	39.2±0.6	179±8			746±32	88±9
[209]	115.1E, 36.87N	GLD		29.8±2.2	10	NH4NO3	6.3±0.07	1	15.2	1120	3	3.13±0.21	2.12±0.1	1.01±0.26	15.2±0.2	38.5±0.6	150±11			711±56	85±8
[209]	115.1E, 36.87N	GLD		44.4±2.7	15	NH4NO3	6.1±0.02	1	15.2	1120	3	2.41±0.21	1.58±0.14	0.83±0.27	14.4±0.2	39.0±0.4	124±6			661±80	60±6
[209]	115.1E, 36.87N	GLD		31.9±2.5	0	NH4NO3	6.7±0.05	2	15.2	1120	3	4.27±0.22	2.79±0.23	1.48±0.07	12.9±0.6	34.0±1.0	196±8			698±37	97±3
[209]	115.1E, 36.87N	GLD		42.4±6.8	5	NH4NO3	6.3±0.25	2	15.2	1120	3	3.6±0.18	2.39±0.27	1.21±0.14	12.5±0.3	34.1±1.2	166±4			619±27	85±3
[209]	115.1E, 36.87N	GLD		53.1±14.0	10	NH4NO3	6.1±0.02	2	15.2	1120	3	2.75±0.27	1.69±0.28	1.06±0.2	12.5±0.4	32.3±1.7	134±5			541±27	90±6
[209]	115.1E, 36.87N	GLD		75.5±8.8	15	NH4NO3	6.0±0.02	2	15.2	1120	3	1.78±0.14	1.22±0.25	0.56±0.1	11.6±0.3	33.1±0.7	100±4			483±17	65±8
[210]	112.17E,23.17N	TR-EF			0	NH4NO3	3.69±0.02	1	21	1927	5									12±0.77	2.35±0.16
[210]	112.17E,23.17N	TR-EF			15	NH4NO3	3.66±0.03	1	21	1927	5									8.07±1.04	1.18±0.27
[210]	112.17E,23.17N	TR-EF	3.3		0	NH4NO3	3.69±0.02	5	21	1927	5	107.06±5.59						5±0.3(%)		9.97±1.09	1.55±0.18
[210]	112.17E,23.17N	TR-EF			15	NH4NO3	3.66±0.03	5	21	1927	5	111.22±9.35						4.6±0.3		9.69±1.14	1.37±0.14
[211]	112.17E,23.17N	TR-EF	3.44		0	NH4NO3	3.91±0.01	15	21.9	1748	3	91.8±4.05						25.4±3.44(g kg-1)		596.18±9.75(mg kg-1)	77.73±0.64
[211]	112.17E,23.17N	TR-EF			5	NH4NO3	3.86±0.01	15	21.9	1748	3	88.2±2.27						29.6±2.54		552.02±20.44	70.71±2.06
[211]	112.17E,23.17N	TR-EF			10	NH4NO3	3.84±0.01	15	21.9	1748	3	85.4±1.4						30.2±0.46		535.34±42.51	68.36±3.44
[211]	112.17E,23.17N	TR-EF			15	NH4NO3	3.71±0.01	15	21.9	1748	3	61.2±0.86						31.9±0.77		459.48±18.42	64.23±5.88
[212]	116.3E, 42N	GLD			0	NH4NO3		1	2.1		6	84.18±5.08								319.74±13.38(mg kg-1)	69.59±7.35
[212]	116.3E, 42N	GLD			10	NH4NO3		1	2.1		6	91.87±9.03								307.18±10.57	99.42±6.71
[212]	116.3E, 42N	GLD			0	NH4NO3		2	2.1		6	54.09±8.48								146.38±9.42	48.05±4.78
[212]	116.3E, 42N	GLD			10	NH4NO3		2	2.1		6	29.43±3.4								155.47±5.45	71.11±2.33
[212]	116.3E, 42N	GLD			0	NH4NO3		3	2.1		6	93.9±7.6								285.69±27.6	76.31±2.22
[212]	116.3E, 42N	GLD			10	NH4NO3		3	2.1		6	77.91±4.34								340.06±45.11	50.79±4.9
[212]	116.3E, 42N	GLD			0	NH4NO3		4	2.1		6	59.61±4.88								296.27±36.02	99.89±6.54
[212]	116.3E, 42N	GLD			10	NH4NO3		4	2.1		6	54.19±3.06								399.56±37.51	118.34±8.7
[213]	125.15E, 46.63N	GLD			0	NH4NO3		1	4.2	427.5	5	3.72							0.16±0.02(%)
[213]	125.15E, 46.63N	GLD			10.5	NH4NO3		1	4.2	427.5	5	3.68
[214]	112.55E,23.17N	subTR-CF	3.84		0	NH4NO3		1	21.4	1927	3	151±3
[214]	112.55E,23.17N	subTR-CF			5	NH4NO3		1	21.4	1927	3	169±10
[214]	112.55E,23.17N	subTR-CF			10	NH4NO3		1	21.4	1927	3	159±6
[214]	112.55E,23.17N	subTR-MF			0	NH4NO3		1	21.4	1927	3	140±5
[214]	112.55E,23.17N	subTR-MF			5	NH4NO3		1	21.4	1927	3	139±4
[214]	112.55E,23.17N	subTR-MF			10	NH4NO3		1	21.4	1927	3	124±9
[214]	112.55E,23.17N	subTR-EF			0	NH4NO3		1	21.4	1927	3	170±9
[214]	112.55E,23.17N	subTR-EF			5	NH4NO3		1	21.4	1927	3	211±8
[214]	112.55E,23.17N	subTR-EF			10	NH4NO3		1	21.4	1927	3	232±8
[214]	112.55E,23.17N	subTR-EF			15	NH4NO3		1	21.4	1927	3	314±9
[215]	116.67E,43.55N	GLD			0	NH4NO3		1	-0.4	400	3	236.69±67.95													60		21
[215]	116.67E,43.55N	GLD			5	NH4NO3		1	-0.4	400	3	313.8±49.04
[215]	116.67E,43.55N	GLD			10	NH4NO3		1	-0.4	400	3	341.57±64.7
[215]	116.67E,43.55N	GLD			20	NH4NO3		1	-0.4	400	3	330.0±43.13
[215]	116.67E,43.55N	GLD			0	NH4NO3		2	-0.4	400	3	286.9±95.42
[215]	116.67E,43.55N	GLD			5	NH4NO3		2	-0.4	400	3	306.1±72.08
[215]	116.67E,43.55N	GLD			10	NH4NO3		2	-0.4	400	3	313.2±74.15
[215]	116.67E,43.55N	GLD			20	NH4NO3		2	-0.4	400	3	311.7±48.74
[216]	128.9E, 47.17	TE-CF	1.293		0	NH4NO3	5.67±0.38	1	-0.3	676	5		76.3±2.9					96.6±7.8(g kg-1)	6.7±0.6(g kg-1)	1.54±0.12(g kg-1)	0.37±0.04
[216]	128.9E, 47.17	TE-CF			2	NH4NO3	5.52±0.21	1	-0.3	676	5		79.4±3.1					87.9±6.5	6.8±0.4	1.45±0.23	0.36±0.06
[216]	128.9E, 47.17	TE-CF			4	NH4NO3	5.34±0.25	1	-0.3	676	5		87.9±3.1					82.5±10.2	6.5±0.7	1.47±0.27	0.35±0.11
[216]	128.9E, 47.17	TE-CF			8	NH4NO3	5.27±0.29	1	-0.3	676	5		110.6±2.8					98.5±8.1	6.7±0.5	1.77±0.25	0.43±0.08
[217]	128.9E, 47.17	TE-CF	1.29		0	NH4NO3		2	-0.3	676	5	64.85±2.43
[217]	128.9E, 47.17	TE-CF			2	NH4NO3		2	-0.3	676	5	68.65±2.24
[217]	128.9E, 47.17	TE-CF			4	NH4NO3		2	-0.3	676	5	74.63±2.55
[217]	128.9E, 47.17	TE-CF			8	NH4NO3		2	-0.3	676	5	69.58±2.93
[217]	128.9E, 47.17	TE-CF			0	NH4NO3		3	-0.3	676	5	64.29±3.49
[217]	128.9E, 47.17	TE-CF			2	NH4NO3		3	-0.3	676	5	69.4±6.48
[217]	128.9E, 47.17	TE-CF			4	NH4NO3		3	-0.3	676	5	65.35±7.54
[217]	128.9E, 47.17	TE-CF			8	NH4NO3		3	-0.3	676	5	63.98±6.54
[217]	128.9E, 47.17	TE-CF			0	NH4NO3		4	-0.3	676	5	67.53±7.29
[217]	128.9E, 47.17	TE-CF			2	NH4NO3		4	-0.3	676	5	49.02±4.05
[217]	128.9E, 47.17	TE-CF			4	NH4NO3		4	-0.3	676	5	60.61±1.93
[217]	128.9E, 47.17	TE-CF			8	NH4NO3		4	-0.3	676	5	62.67±3.8
[217]	118.13E, 25.63N	subTR-EF	1.71		0	NH4NO3		2	17.55	1850	3	67.47±4.11
[217]	118.13E, 25.63N	subTR-EF			2	NH4NO3		2	17.55	1850	3	92.20±10.72
[217]	118.13E, 25.63N	subTR-EF			4	NH4NO3		2	17.55	1850	3	79.06±6.29
[217]	118.13E, 25.63N	subTR-EF			8	NH4NO3		2	17.55	1850	3	61.23±10.41
[217]	118.13E, 25.63N	subTR-EF	1.71		0	NH4NO3		2	17.55	1850	3	59.05±5.11
[217]	118.13E, 25.63N	subTR-EF			2	NH4NO3		2	17.55	1850	3	71.76±5.73
[217]	118.13E, 25.63N	subTR-EF			4	NH4NO3		2	17.55	1850	3	67.96±1.99
[217]	118.13E, 25.63N	subTR-EF			8	NH4NO3		2	17.55	1850	3	62.04±3.8
[217]	118.13E, 25.63N	subTR-EF	1.71		0	NH4NO3		2	17.55	1850	3	86.35±9.16
[217]	118.13E, 25.63N	subTR-EF			2	NH4NO3		2	17.55	1850	3	106.47±6.73
[217]	118.13E, 25.63N	subTR-EF			4	NH4NO3		2	17.55	1850	3	89.46±7.6
[217]	118.13E, 25.63N	subTR-EF			8	NH4NO3		2	17.55	1850	3	85.1±8.1
[218]	103.63E, 30.58N	subTR-EF			0	NH4NO3	4.6	3			3	5.85±0.43							0.81±0.01									10.95±0.58
[218]	103.63E, 30.58N	subTR-EF			5	NH4NO3		3			3	6.48±0.71																11.82±0.84
[218]	103.63E, 30.58N	subTR-EF			15	NH4NO3		3			3	6.84±0.57																12.26±0.88
[218]	103.63E, 30.58N	subTR-EF			30	NH4NO3		3			3	7.62±0.55																15.01±0.92
[219]	116.67E, 42.45N	GLD			0	NH4NO3		1	2.1	382.2	6	162.85±14.19								296.86±16.31(mg kg-1)	94.36±13.62							211.66±35.33
[219]	116.67E, 42.45N	GLD			10	NH4NO3		1				166.14±9.41								286.82±13.17	129.58±9.64							293.58±23.22
[219]	116.67E, 42.45N	GLD			0	NH4NO3		2				46.29±6.13								162.95±31.99	61.12±5.32							192.14±17.1
[219]	116.67E, 42.45N	GLD			10	NH4NO3		2				34.93±4.33								136.29±17.87	45.17±4.21							232.18±17.81
[219]	116.67E, 42.45N	GLD			0	NH4NO3		3				131.47±6.13								348.29±24.46	92.14±5.21							276.06±13.68
[219]	116.67E, 42.45N	GLD			10	NH4NO3		3				113.98±7.32								350.48±25.09	99.78±6.42							438.18±21.23
[219]	116.67E, 42.45N	GLD			0	NH4NO3		4				59.29±8.37								396.27±35.75	101.89±8.42							194.28±29.49
[219]	116.67E, 42.45N	GLD			10	NH4NO3		4				59.44±15.24								329.79±32.93	122.05±15.84							289.73±34.9
[220]	111.15E, 31.91N	TE-DF			0	NH4NO3		5	12.6	1476.6	3	2.03±0.19													51	40	9
[220]	111.15E, 31.91N	TE-DF			5	NH4NO3		5	12.6	1476.6	3	2.39±0.37
[220]	111.15E, 31.91N	TE-DF			15	NH4NO3		5	12.6	1476.6	3	3.33±0.28
[220]	111.15E, 31.91N	TE-DF			5	NaNO3		5	12.6	1476.6	3	2.34±0.31
[220]	111.15E, 31.91N	TE-DF			15	NaNO3		5	12.6	1476.6	3	3.09±0.18
[220]	111.15E, 31.91N	TE-DF			5	(NH4)2SO4		5	12.6	1476.6	3	2.58±0.26
[220]	111.15E, 31.91N	TE-DF			15	(NH4)2SO4		5	12.6	1476.6	3	3.72±0.14
[221]	115.1E,26.7N	subTR-CF			0	NH4NO3		2	17.9	1469	4	3.26±0.21							1.26(g kg-1)
[221]	115.1E,26.7N	subTR-CF			5	NH4NO3		2	17.9	1469	4	3.53±0.13
[221]	115.1E,26.7N	subTR-CF			10	NH4NO3		2	17.9	1469	4	3.8±0.13
[221]	115.1E,26.7N	subTR-CF			0	NH4NO3		3	17.9	1469	4	3.52±0.15
[221]	115.1E,26.7N	subTR-CF			5	NH4NO3		3	17.9	1469	4	3.92±0.21
[221]	115.1E,26.7N	subTR-CF			10	NH4NO3		3	17.9	1469	4	4.18±0.12
[221]	115.1E,26.7N	subTR-CF			0	NH4NO3		4	17.9	1469	4	4.05±0.14
[221]	115.1E,26.7N	subTR-CF			5	NH4NO3		4	17.9	1469	4	4.54±0.19
[221]	115.1E,26.7N	subTR-CF			10	NH4NO3		4	17.9	1469	4	4.86±0.25
[222]	115.05E,26.75N	subTR-CF	4		0			2	17.9	1505	3	53.68±5.03							1.1(g kg-1)
[222]	115.05E,26.75N	subTR-CF			4	NH4Cl		2	17.9	1505	3	48.04±4.69
[222]	115.05E,26.75N	subTR-CF			12	NH4Cl		2	17.9	1505	3	72.84±6.92
[222]	115.05E,26.75N	subTR-CF			4	NaNO3		2	17.9	1505	3	43.13±4.69
[222]	115.05E,26.75N	subTR-CF			12	NaNO3		2	17.9	1505	3	48.10±5.3
[223]	105E, 28.45N	subTR-CF			0	NH4NO3	4.57±0.06	2	18.3	1141.7	3	33.51±1.32	17.18±1.75	25.97±2.42			2440.23±748.15(kg ha-1)		10.92±0.52(g kg-1)
[223]	105E, 28.45N	subTR-CF			10	NH4NO3	4.48±0.06	2	18.3	1141.7	3	33.24±3.04	21.16±2.75	31.61±4.13			1888.91±170.35		12.81±0.45
[224]	101.9E, 33,63N	GLD			0	NH4NO3	5.85±0.04	6	1.2	620	5								5.26±0.23(g kg-1)	1440±144(mg kg-1)
[224]	101.9E, 33,63N	GLD			5	NH4NO3	5.68±0.04	6	1.2	620	5								5.42±0.52	1385±131
[224]	101.9E, 33,63N	GLD			10	NH4NO3	5.53±0.03	6	1.2	620	5								5.44±0.46	1296±112
[224]	101.9E, 33,63N	GLD			20	NH4NO3	5.12±0.02	6	1.2	620	5								6.33±0.34	1183±53
[225]	127.53E, 45.4N	TE-CF			0	NH4NO3		9	2.8	700	3									939.31±141.09(mg kg-1)	92.35±11.37
[225]	127.53E, 45.4N	TE-CF			10	NH4NO3		9	2.8	700	3									499.1±42.73	51.08±3.49
[226]	100.25E,37.3N	GLD	1		0	NH4NO3		2	0.08	390	5		2.22±0.05	2.22±0.12
[226]	100.25E,37.3N	GLD			1	NH4NO3		2	0.08	390	5		2.23±0.07	2.35±0.1
[226]	100.25E,37.3N	GLD			2	NH4NO3		2	0.08	390	5		2.24±0.1	2.79±0.12
[226]	100.25E,37.3N	GLD			4	NH4NO3		2	0.08	390	5		2.15±0.1	3.15±0.17
[226]	100.25E,37.3N	GLD			8	NH4NO3		2	0.08	390	5		1.87±0.08	3.54±0.14
[226]	100.25E,37.3N	GLD			16	NH4NO3		2	0.08	390	5		1.94±0.07	3.06±0.17
[226]	100.25E,37.3N	GLD			24	NH4NO3		2	0.08	390	5		1.88±0.06	2.92±0.12
[226]	100.25E,37.3N	GLD			32	NH4NO3		2	0.08	390	5		1.68±0.12	2.95±0.16

## Sheet: Reference
NO.	Authors	Title	Journal	Year	Pages
[001]	Li J, Yin CL, Zhou XB, Wei H, Gao Q, Liu Q	Effects of nitrogen addition on soil respiration of sibiraea angustata shrub in the eastern margin of Qinghai- Tibetan Plateau.	Acta Ecologica Sinica	2014	34:5558-5569
[002]	Wu D, Zhang R, Gao SH, Fu X, Deng HB, Shao GF, Zhang XD	Effects of simulated nitrogen deposition on the each component of soil respiration in the Populus L. plantations in a riparian zone of the mid- lower Yangtze River.	Acta Ecologica Sinica	2015	35:717-724
[003]	Wang ZX, Chen QM, Huang YY, Deng HN, Shen X, Zheng J, Liu Y c	Response of soil respiration and microbial biomass carbon and nitrogen to nitrogen application in subalpine forests of western Sichuan.	Acta Ecologica Sinica	2019	39:1-11
[004]	Liu XF, Yang ZJ, Lina CF, Giardina CP, Xiong DC, Lin WS, Chena SD, Xu C, Chena GS, Xie JS, Lia YQ,Yang YS	Will nitrogen deposition mitigate warming-increased soil respiration in a young subtropical plantation?	Agricultural and Forest Meteorology	2017	246:78-85
[005]	Wang QK, Liu SG, Wang YP, Tian P, Sun T	Influences of N deposition on soil microbial respiration and its temperature sensitivity depend on N type in a temperate forest.	Agricultural and Forest Meteorology	2018	260-261:240-246
[006]	Chen F, Yan GY, Xing YJ, Zhang JH, Wang QG, Wang HL, Huang BB, Hong ZM, Dai GH, Zheng XB, Liu T c	Effects of N addition and precipitation reduction on soil respiration and its components in a temperate forest.	Agricultural and Forest Meteorology	2019	271:336-345
[007]	Brenner RE, Boone RD, Ruess RW	Nitrogen additions to pristine, high-latitude, forest ecosystems: consequences for soil nitrogen transformations and retention in mid and late succession	Biogeochemistry	2005	72:257-282
[008]	Chen CR, Xu ZH, Hughes JM	Effects of nitrogen fertilization on soil nitrogen pools and microbial properties in a hoop pine (Araucaria cunninghamii) plantation in southeast Queensland, Australia.	Biology and Fertility of Soils	2002	36:276-283
[009]	Michel K &Matzner E	Response of enzyme activities to nitrogen addition in forest floors of different C-to-N ratios.	Biology and Fertility of Soils	2003	38:102-109
[010]	Yan GY, Xing YJ, Wang JY, Zhang Z, Xu LJ, Han SJ, Zhang, JH, Dai GH, Wang QG	Effects of winter snowpack and nitrogen addition on the soil microbial community in a temperate forest in northeastern China.	Ecological Indicators	2018	93:602-611
[011]	Chen S, Hao TX, Goulding K, Misselbrook T, Liu XJ a	Impact of 13-years of nitrogen addition on nitrous oxide and methane fluxes and ecosystem respiration in a temperate grassland.	Environmental Pollution	2019	252:675-681
[012]	Bai W, Wang GX, Xi JY, Liu YW, Yin PS	Short-term responses of ecosystem respiration to warming and nitrogen addition in an alpine swamp meadow.	European Journal of Soil Biology	2019	92:16-23
[013]	Lee KH, Jose SB	Soil respiration, fine root production, and microbial biomass in cottonwood and loblolly pine plamtations along a nitrogen fertilization gradient	Forest Ecology and Management	2003	185:263-273
[014]	Bowden RD, Davidson E, Savage K, Arabia C, Steudler P	Chronic nitrogen additions reduce total soil respiration and microbial respiration in temperate forest soils at the Harvard Forest.	Forest Ecology and Management	2004	196:43-56
[015]	Liu HM, Zhou GY, Bai SH, Song JJ, Shang YJ, He M	Differential response of soil respiration to nitrogen and phosphorus addition in a highly phosphorus-limited subtropical forest, China.	Forest Ecology and Management	2019	448:499-508
[016]	Wallenstein MD, McNulty S, Fernandez IJ, Boggs J, Schlesinger WH	Nitrogen fertilization decreases forest soil fungal and bacterial biomass in three long-term experiments	Forest Ecology and Management	2006	222:459-468
[017]	Micks P, Aber, JD, Boone, RD, Davidson, EA	Short-term soil respiration and nitrogen immobilization response to nitrogen applications in control and nitrogen-enriched temperate forests	Forest Ecology and Management	2004	196:57-70
[018]	Jeong J, Bolan N, Kin C	Heterotrophic soil respiration affected by compound fertilizer types in red pine (Pinus densiflora S. et Z.) stands of Korea.	Forests	2016	7:1-12
[019]	Zhao B, Geng Y, Cao J, Yang L, Zhao XH	Contrasting responses of soil respiration components in response to five-year nitrogen addition in a Pinus tabulaeformis forest in northern China.	Forests	2018	9:1-14
[020]	Sinsabaugh RL, Belnap J, Rudgers J, Kuske CR, Martinez N, Sandquist D	Soil microbial responses to nitrogen addition in arid ecosystems.	Frontiers in Microbiology	2015	6:1-12
[021]	Wang JS, Song B, Ma FF, Tian DS, Li Y, Yan T, Quan Q, Zhang FY, Li ZL, Wang BX, Gao Q, Chen WN, Niu SL g	Nitrogen addition reduces soil respiration but increases the relative contribution of heterotrophic component in an alpine meadow.	Functional Ecology	2019	00:1-15
[022]	Moinet GYK, Cieraad E, Rogers GND, Hunt JE, Millard P, Turnbull MH, Whitehead D	Addition of nitrogen fertiliser increases net ecosystem carbon dioxide uptake and the loss of soil organic carbon in grassland growing	Geoderma	2016	266:75-83
[023]	Sun SQ, Wu YH, Zhang J, Wang GX, DeLuca TH, Zhu W, Li A, Duan M, He L	Soil warming and nitrogen deposition alter soil respiration, microbial community structure and organic carbon composition in a coniferous forest on eastern Tibetan Plateau.	Geoderma	2019	353:283-292
[024]	Allison SD, Czimczik C, Treseder KK	Microbial activity and soil respiration under nitrogen addition in Alaskan boreal forest.	Global Chang Biology	2008	14:1156-1168
[025]	Högberg P, Fan H, Quist M, Binkle D, Tamm CO	Tree growth and soil acidification in response to 30 years of experimental nitrogen loading on boreal forest.	Global Change Biology	2006	12:489-499
[026]	Harpole WS, Potts DL, Suding KN	Ecosystem responses to water and nitrogen amendment in a California grassland.	Global Change Biology	2007	13:2341-2348
[027]	Mo JM, Zhang W, Zhu WX, Gundersen P, Fang YT, Li DJ, Wang H	Nitrogen addition reduces soil respiration in a mature tropical forest in southern China.	Global Change Biology	2008	14:403-412
[028]	Du YH, Guo P, Liu JQ, Wang CY, Yang N, Jiao, ZX	Different types of nitrogen deposition show variable effects on the soil carbon cycle process of temperate forests.	Global Change Biology	2014	20, 3222-3228
[029]	Tian J, Dungai JAJ, Lu XK, Yang YF, Hartley LP, Zhang W, Mo JM, Yu GR, Zhou JZ, Kuzyakov Y	Long‐term nitrogen addition modifies microbial composition and functions for slow carbon cycling and increased sequestration in tropical forest soil.	Global Change Biology	2019	25:3267-3281
[030]	Xu ZC	Soil respiration of Hulunber meadow steppe under the addition of nitrogen and phosphorus nutrients	Inner Mongolia University	2019	1-50
[031]	Wang J, Wang GX, Fu, Y, Chen, XP, Song XY b	Short-term effects of nitrogen deposition on soil respiration components in two alpine coniferous forests, southeastern Tibetan Plateau	Journal of Forest Research	2019	30:1029-1041
[032]	Sun T	Effects of simulated nitrogen deposition on the main components of ecosystem respiration in Larix gmelinii plantation in Northeastern China.	Northeast Forestry University	2014	1-90
[033]	Zong N, Shi PL, Chai X, Jiang J, Zhang XZ, Song MH	Responses of ecosystem respiration to nitrogen enrichment and clipping mediated by soil acidification in an alpine meadow.	Pedobiologia - Journal of Soil Ecology	2017	60:1-10
[034]	Yan WD, Chen XY, Peng YY, Zhu F,Zhen W, Zhang XY	Response of soil respiration to nitrogen addition in two subtropical forest types.	Pedosphere	2020	1-18
[035]	Peng Y, Chen GT, Li S, Hu HL, Hu TX, Liu L, Tang Y, Tu LH	Nitrogen additions reduce rhizospheric and heterotrophic respiration in a subtropical evergreen broad-leaved forest.	Plant Soil	2018	431:449-463
[036]	Edwards IP, Zak DR, Kellner H, Eisenlord S, Pregitzer KS	Simulated atmospheric N deposition alters fungal community composition and suppresses ligninolytic gene expression in a northern hardwood forest.	Plos one	2011	6:e20421
[037]	Graham SL, Hunt JE, Millard P, McSeveny T, Tylianakis JM, Whitehead D	Effects of soil warming and nitrogen addition on soil respiration in a New Zealand tussock grassland.	Plos one	2014	9:e91204
[038]	Wang JB, Fu XL, Zhang Z, Li MH, Cao HJ, Zhou XL, Ni HW a	Responses of soil respiration to nitrogen addition in the Sanjiang Plain wetland, northeastern China	Plos one	2019	14:1-12
[039]	Huang SD, Li J M, Ye GF, Nei S, Chen Z, Chen J, Huang L	Response of soil respiration of different components to nitrogen addition in a Castanea mollissima plantation.	Science of Soil and Water Conservation	2014	12:95-100
[040]	Luo QP, Gong JR, Zhai ZW, Pan Y, Liu M, Xu S, Wang YH, Yang LL, Baoyin TT	The responses of soil respiration to nitrogen addition in a temperate grassland in northern China.	Science of the Total Environment	2016	569-570:1466-1477
[041]	Moinet GYK, Cieraad E, Turnbull MH, Whitehead D	Effects of irrigation and addition of nitrogen fertiliser on net ecosystem carbon balance for a grassland.	Science of the Total Environment	2017	579:1715-1725
[042]	Wang Z, Mckenna TP, Schellenberg MP, Tang SM, Zhang YJ, Ta N, Na R, Wang H e	Soil respiration response to alterations in precipitation and nitrogen addition in a desert steppe in northern China.	Science of the Total Environment	2019	688:231-242
[043]	Ehtesham E & Bengtson P	Decoupling of soil carbon and nitrogen turnover partly explains increased net ecosystem production in response to nitrogen fertilization	Scientific Reports	2017	7:46286
[044]	Li CB, Peng YF, Nie XQ, Yang YH, Yang LC, Li F, Fang K, Xiao YM, Zhou GY	Differential responses of heterotrophic and autotrophic respiration to nitrogen addition and precipitation changes in a Tibetan alpine steppe.	Scientific Reports	2018	8:16546
[045]	Priess JA & Fölster H	Microbial properties and soil respiration in submontane forests of Venezuelian Guyana: characteristics and response to fertilizer treatments.	Soil Biology & Biochemistry	2001	32:503-509
[046]	Allison SD, Gatner TB, Mack MC, McGuire K, Treseder K	Nitrogen alters carbon dynamics during early succession in boreal forest.	Soil Biology & Biochemistry	2010	42:1157-1164
[047]	Tu LH, Hu TX, Li XW, Hu HL, Liu L, Xiao YL	Nitrogen addition stimulates different components of soil respiration in a subtropical bamboo ecosystem.	Soil Biology & Biochemistry	2013	58:255-264
[048]	Poulsen PHB, Magid J, Luxhoi j, de Neergaard A	Effects of fertilization with urban and agricultural organic wastes in a field trial - Waste imprint on soil microbial activity.	Soil Biology & Biochemistry	2013	57:794-802
[049]	Demoling F, Nilsson LO, Baath E	Bacterial and fungal response to nitrogen fertilization in three coniferous forest soils	Soil Biology & Biochemistry	2008	40:370-379
[050]	Duan PP, Xiao KC, Wang KL,Li DJ	Responses of soil respiration to nitrogen addition are mediated by topography in a subtropical karst forest	Catena	2023	221:106759
[051]	Xing AJ,Du EZ,Shen HH,Xu LC,Zhao MY,Liu XY,Fang JY	High-level nitrogen additions accelerate soil respiration reduction over time in a boreal forest	Ecology Letters	2022	25:1869-1878
[052]	Fu RX,Xu XN,Yu YC,Zhang YB,Sun ZL,Tao X	Forest soil respiration response to increasing nitrogen deposition along an urban–rural gradient	Global Ecology and Conservation	2021	e01575
[053]	Zheng MH, Zhang T, Luo YQ, Liu JX, Lu XK, Ye Q,Wang SH, Huang J,Mao QG,Mo JM,Zhang W	Temporal patterns of soil carbon emission in tropical forests under long-term nitrogen deposition	Nature Geoscience	2022	15:1002-1010
[054]	Ferna´ndez-Alonso MJ, Ferna´ndez-Alonso E, Rubio A	Drivers of soil respiration in response to nitrogen addition in a Mediterranean mountain forest	Biogeochemistry	2021	155:305-321
[055]	Lafuente A, Recio J, Ochoa-Hueso R, Gallardo A, Pérez-Corona ME, Manrique E,Durán J	Simulated nitrogen deposition influences soil greenhouse gas fluxes in a Mediterranean dryland	Science of the Total Environment	2020	737:139610
[056]	Tafazoli M, Hojjati, SM, Jalilvand H,Lamersdorf N,Tafazoli M	Effect of nitrogen addition on soil CO2 efflux and fine root biomass in maple monocultures of the hyrcanian region	Annals of Forest Science	2021	78(2):29
[057]	Zhang JJ, Ru JY, Song J, Heng L, Li XM, Ma YF,Li Z, Hao YF, Chi ZS, Hui DF, Wan SQ	Increased precipitation and nitrogen addition accelerate the temporal increase in soil respiration during 8-year old-field grassland succession	Global Change Biology	2022	28:3944-3959
[058]	Wang T, Ao J, Liu XY, Peng XY, Op de Beeck M, Chang RY	Simultaneous measurements of dissolved organic carbon and soil respiration reveal reduced soil carbon loss under nitrogen addition in a montane forest	JGB Biogeoscience	2022	127:e2022JG006829
[059]	Verma P, Sagar R	Soil respiration response to nitrogen fertilization experiment in tropical grassland	Ecological Research	2021	37:390-405
[060]	Xing AJ, Shen HH, Zhao MY, Fang JY	Long‑term nitrogen addition reduced soil respiration contributed by decline in the understory plant cover but not species richness	Plant Soil	2023	492:125-134
[061]	Wei SZ, Tie LH, Liao J, Liu X, Du ML, Lan SX, Li XR, Li CS, Zhan HC, Huang CD	Nitrogen and phosphorus co-addition stimulates soil respiration in a subtropical evergreen broad-leaved forest	Plant Soil	2020	450:171-182
[062]	Li LT, Sun XK, Yu ZY, Huang Y, Zeng DH	Response of soil respiration to water and nitrogen addition and its influencing factors: a four-year field experiment in a temperate steppe	Plant Soil	2021	471:427-442
[063]	Shi BK, Fu X, Smith MD, Chen A, Knapp AK, Wang C, Xu W, Zhang R, Cao W, Sun W	Autotrophic respiration is more sensitive to nitrogen addition and grazing than heterotrophic respiration in a meadow steppe	Catena	2022	106207
[064]	Song J, Xia J, Hui D, Zheng M, Wang J, Ru Y, Wang H, Zhang Q, Yang C, Wang S	Plant functional types regulate non-additive responses of soil respiration to 5-year warming and nitrogen addition in a semi-arid grassland	Functional Ecology	2021	35:2593-2603
[065]	Peng Y, Song SY, Li ZY, Li S, Chen GT, Hu HL, Xie JH, Chen G, Xiao YL, Liu L, Tang Y, Tu LH	Influences of nitrogen addition and aboveground litter-input manipulations on soil respiration and biochemical properties in a subtropical forest	Soil Biology and Biochemistry	2020	107694
[066]	Zhou J, Chen Z, Yang Q, Jian C, Lai S, Cheng Y, Xu B	N and P addition increase soil respiration but decrease contribution of heterotrophic respiration in semiarid grassland	Agriculture, Ecosystems and Environment	2021	318:107493
[067]	Forsmark B, Nordin A, Maaroufi N I, Lundmark T, Gundale M J	Low and high nitrogen deposition rates in northern coniferous forests have different impacts on aboveground litter production, soil respiration, and carbon stocks	Ecosystems	2020	23:1423-1436
[068]	Cascio ML, Morillas L, Ochoa-Hueso R, Munzi S, Roales J,Hasselquis NJ, Manrique E, Spano D, Jaoudé RA, Mereu s	Contrasting effects of nitrogen addition on soil respiration in two Mediterranean ecosystems	Environment Science and Pollution Research	2017	24:6160-26171
[069]	Wilcots ME, Schroeder KM, DeLancey LC, Kjaer SL, Hobbie SE, Seabloom EW, Borer ET	Realistic rates of nitrogen addition increase carbon flux rates but do not change soil carbon stocks in a temperate grassland	Global Change Biology	2022	28:4819-4831
[070]	Hasselquist NJ, Metcalfe DB, Hogberg P	Contrasting effects of low and high nitrogen additions on soil CO2 ﬂux components and ectomycorrhizal fungal sporocarp production in a boreal forest	Global Change Biology	2012	18:3596-3605
[071]	Ambus P, Robertson G P	The effect of increased N deposition on nitrous oxide, methane and carbon dioxide fluxes from unmanaged forest and grassland communities in Michigan	Biogeochemistry	2006	79:315-337
[072]	Vose JM, Elliott KJ, Johnson DW, Walker RF, Johnson MG, Tingey DT	Effects of elevated CO2 and N fertilization on soil respiration from ponderpsa pine (Pinus ponderosa) in open-top chambers	Canadian Journal of Forest Research	1995	25:1243-1251
[073]	Franklin O, Hogberg P. Ekblad A, Agren G I	Pine forest floor carbon accumulation in response to N and PK addition: Bomb 14C modelling and respiration studies	Ecosystems	2003	6:644-658
[074]	Maritch MD, Hunter MD	Intraspecific litter diversity and nitrogen deposition affect nutrient dynamics and soil respiration	Oecologia	2003	136:124-128
[075]	Nohrstedt HO, Arnebrant K, Baath E, Soderstrom B	Changes in carbon content, respiration rate, ATP content, and microbial biomass in nitrogen-fertilized pine forest soils in Sweden	Journal of Forest Research	1989	19:323-328
[076]	Johnson D, Geisinger D, Walker R, Newman J, Vose J, Elliot K, Ball T	Soil Pco2, soil respiration, and root activity in CO2-fumigated and nitrogen-fertilized ponderosa pine	Plant and Soil	1994	165:129-138
[077]	Picek T, Kastovska E, Edwards K, Zemanova K, Dusek	Short term effects of experimental eutrophication on carbon and nitrogen cycling in two types of wet grassland	Community Ecology	2008	9:81-90
[078]	Burton AJ, Pregitzer KS, Crawford JN, Zogg GP, Zak DR	Simulated chronic NO3 deposition reduces soil respiration in northern hardwood forests	Global Change Biology	2004	10:1080-1091
[079]	Cleveland CC, Townsend AR	Nutrient additions to a tropical rain forest drive substantial soil carbon dioxide losses to the atmosphere	PNAS	2006	103:10316-10321
[080]	Gulledge J, Schimel JP	Controls on soil carbon dioxide and methane fluxes in a variety of Taiga forest stands in Interior Alaska	Ecosystems	2000	3:269-282
[081]	Contosta AR, Frey SD, Cooper AB	Seasonal dynamics of soil respiration and N mineralization in chronically warmed and fertilized soils	Ecosphere	2011	2:1-21
[082]	Jones SK, Rees RM, Kosmas D, Ball BC, Skiba UM	Carbon sequestration in a temperate grassland mansgement and climatic controls	Soil Use and Management	2006	22:132-142
[083]	Maljanen M, Jokinen H, Saari A, Strommer R, Martikainee PJ	Methane and nitrous oxide fluxes, and carbon dioxide production in boreal foret soil fertilized with wood ash and nitrogen	Soil Use and Management	2006	22:151-157
[084]	Oishi Chritopher A, Palmroth S, Johnsen K, Mccarthy HR, Oren R	Sustained effects of atmospheric [CO2] and nitrogen availability on forest soil CO2 efflux	Global Change Biology	2014	20:1146-1160
[085]	Rodriguez A, Lovett GM, Weathers KC, Arthur MA, Templer PH, Goodale CL, Christenson LM	Lability of C in temperate forest soils: Assessing the role of nitrogen addition and tree species composition	Soil Biology & Biochemistry	2014	77:129-140
[086]	Reich PB, Hobbie SE, Lee TD, Rich R, Pastore MA, Worm K	Synergistic effects of four climate change drivers on terrrestrail carbon cycling	Nature Geoscience	2020	13:787-793
[087]	Hood-Nowotny R, Schmittner K, Ziss E, Leitner S, Watzinger A, Gorfer M, Djukic I, Dirnböck T	Functional response of an Austrian forest soil to N addition	Environmental Research Communications	2021	3:025001
[088]	Růžek M, Tahovská K, Guggenberger G, Oulehle F	Litter decomposition in European coniferous and broadleaf forests under experimentally elevated acidity and nitrogen addition	Plant Soil	2021	463:471-485
[089]	Yan G, Xing Y, Liu C, Huang B, Wang Q	Precipitation pattern regulates soil carbon flux responses to nitrogen addition in a temperate forest	Ecosystems	2021	24:1608-1623
[090]	Jin S, Qu Y, Han Z, Wang D, Rong Y	Effects of short-term nitrogen addition on soil respiration and its components of fencing and mowing grasslands in the Hui River Basin of Hulunbuir	Chinese Journal of Ecology	2025	16:34-49
[091]	Xiang X, De K, Lin W, Feng T, Li F, Wei X	Effects of short-term warming and nitrogen deposition on soil respiration in the alpine medow of Qinghai-Tibet Plateau	Acta Agrestia Sinica	2024	15:13:55
[092]	Wang Y, Luan J, Chen C, Liu S	Asymmetric response of soil respiration and its components to nitrogen and phosphorus addition in Phyllostachys edulis Forest	Science Silive Science	2023	59:54-64
[093]	Wang L, D’Odorico P, O’Halloran LR, Caylor K, Macko S	Combined effects of soil moisture and nitrogen availability variations on grass productivity in African savannas	Plant Soil	2010	328:95-108
[094]	Haynes BE, Gower ST	Belowground carbon allocation in unfertilized and fertilized red pine plantations in northern Wisconsin	Tree Physiology	1994	15:317-325
[095]	Brummr B, Beese F	Effects of liming and nitrogen fertilization on emissions of CO2 and N2O from a temerate forest	Journal of Geophysical Research	1992	12:851:858
[096]	Chen D, Li J, Lan Z, Hu S, Bai Y	Soil acidification exerts a greater control on soil respiration than soil nitrogen availability in grasslands subjected to long-term nitrogen enrichment	Functional Ecology	2016	30:658-669
[097]	Zhang H, Liu Y, Zhou Z, Zhang Y	Inorganic nitrogen addition affects soil respiration and belowground organic carbon fraction for a Pinus tabuliformis forest	Forests	2019	0.672917
[098]	Bo Y, Wang H, Ren Y, Liu X, Diao H, Wang C, Dong K	Response of soil respiration to different levels of short-term nitrogen addition in Saline grassland ecosystem	Chinese Journal of Grassland	2020	42:109-117
[099]	Yao M, Rui J, Li J, Dai Y, Bai Y, Hedenec P, Wang J, Zhang S, Pei K, Liu C, Wang Y, He Z, Frouz J, Li X	Rate-specific responses of prokaryotic diversity and structure to nitrogen deposition in the Leymus chinensis steppe	Soil Biology & Biochemistry	2014	79:81-90
[100]	Yang Z, Gamadaerji, Tan X, You C, Wang Y, Yang J, Han X, Chen S	Effects of nitrogen addition amount and frequency on soil respiration and its components in a temperate semiarid grassland	Chinese Journal of Plant Ecology	2020	44:1059-1072
[101]	Chen Y, Yan W, Zheng W, Liao J, Pan Y, Liang X, Yang K	Effects of litter on soil respiration under simulated nitrogen deposition in a Cinnamomum camphora forest	Acta Ecologica Sinica	2018	38:7830-7839
[102]	Gao W, Shi J, Jin G	Effect of simulated nitrogen deposition on soil respiration in the typical mixed broadleaved-korean pine forest	Journal of Nanjing Forestry University(Natural Sciences Edition)	2016	40:8-14
[103]	Hu Z, Li H, Yang Y, Chen S, Li C, Shen S	Effects of simulated nitrogen deposition on soil respiration in northern subtropical deciduous broad-leaved forest	Environmental Science	2010	31:1726-1732
[104]	Li Q, Song X, Chang S, Peng C, Xiao W, Zhang J, Xiang W, Li Y, Wang W	Nitrogen depositions increase soil respiration and decrease temperature sensitivity in a Moso bamboo forest	Agricultural and Forest Meteorology	2019	268:48-54
[105]	QI Y, Liu X, Dong Y, Peng Q, He Y, Sun L, Jia J, Cao C	Differential responses of short-term soil respiration dunamics to the experimental addition of nitrogen and water in the temperate semi-arid steppe of Inner Mongolia, China	Journal of Environmental Sciences	2014	26:834-845
[106]	Sun H, Zhao J, Xiao Y, Feng J, Zhang Z	Soil respiration and its response to simulated nitrogen deposition in a subtropical evergreen broad-leaved forest in Mount Wuyi	Ecology and Environmental Sciences	2018	27(9):1632-1638
[107]	Tu L, Dai H, Hu T, Zhang J, Luo S	Effects of similated nitrogen deposition on soil respiration in a Bambusa pervariabilis × Dendrocala mopsi plantation in Rainy Area of West China	Chinese Journal of Applied Ecology	2011	22(4):829-836
[108]	Zhu J, Kang F, Chen J, Cheng X, Han H	Effect of nitrogen on soil respiration in a Larch plantation	Polish Journal of Environmental Studies	2017	26(3):1403-1412
[109]	Xiang Y, Huang C, Hu T, Tu L, Zhou S, Xiao Y, Gao B	Responses of soil respiration to simulated nitrogen deposition in evergreen broad-leaved forest in the Rainy Area of Western China	Journal of Northwest A&F University	2016	44(10):68-82
[110]	Yan G, Xing Y, Xu L, Wang J, Meng W, Wang Q, Yu J, Zhang Z, Wang Z, Jiang S, Liu B, Han S	Nitrogen deposition may enhance soil carbon storage via change of soil respiration dynamic during a spring freeze-thaw cycle period	Scientific Reports	2016	6:29134
[111]	Liu Y, Yan W, Zheng W, Wang G, Zhang X, Liang X, Gao C	The effect of nitrogen addition on soil respiration and associated factors in Pinus elliottii forest	Acta Ecologica Sinica	2016	36(2);342-349
[112]	Li R, Tu L, Hu T, Zhang J, Lu Y, Liu W, Luo S, Xiang Y	Effects of simulated nitrogen deposition on soil respiration in a Neosinocalamus affinis is plantation in Rainy Area of West China	Chinese Journal of Applied Ecology	2010	21(7):1649-1655
[113]	Barneze AS, Whitaker J, McNamara NP, Ostle NJ	Interactive effects of climate warming and management on grassland soil respiration partitioning	Environmental of Soil Science	2024	75:e13491
[114]	Pan B, Deng Z, Yu Y, Xu X, Bi L, Tao X	Differential responses of soil respiration and its components to nitrogen application in urban forests	Forests	2022	13:2064
[115]	Frey DW, Kebede E, Sparks JP, Fahey TJ, Goodale CL	Increased soil nitrogen availability suppresses annual soil respiration in mixed temperate forests regardless of acidification	Global Change Biology	2025	31:e70140
[116]	Hao L, Wang Q, Liu T	Short-term responses of soil respiration, temperature and humidity sensitivity to nitrogen addition in four forests of Northeast China	Acta Ecologica Sinica	2020	40(2):560-567
[117]	Bai Y, Cheng J, Kang F, Cheng X, Han H, Zhu J	Effect of different litter treatment under simulated nitrogen deposition on soil respiration in Larix principis-rupprechtii Mayr. Plantation in the Taiyue Mountain, China	Journal of Central South University of Forestry & Technology	2017	37(4):92-99
[118]	Huang X, Li Y, Yu S, Cui Y, Guan F, Li Y, Wu J, Hu Y, Li Z, Zhuang P, Zou B, Qin G, Zhang J, Zhou J, Ding R, Wang F	Nitrogen deposition mitigates long-term phosphorus input-induced stimulative effects on soil respiration in a tropical forest	Geoderma	2025	453:117142
[119]	Li Q, Zhang C, Shi M, Lv J, Peng C, Zhang J, Chang S, Cao T, Li T, Song X	Long-term nitrogen addition has a positive legacy effect on soil respiration in subtropical Moso bamboo forests	Geoderma	2024	452:117092
[120]	Inclán R, Pérez‑Pastor R,Clavero MA, Cicuéndez V, Cobos J, Remedios E, Sánchez‑Ledesma DM	Soil carbon responses to prescribed burning, nitrogen addition, and their interactions in a Mediterranean shrubland	Biogeochemistry	2025	7 days, 0:29:00
[121]	Zhuang W, Li Y, Kang X, Yan L, Zhang X, Yan Z, Zhang K, Yang A, Niu Y, Yu X, Wang H, An M, Che R	Changes in soil oxidase activity induced by microbial life history strategies mediate the soil response to drought and nitrogen enrichment	Frontiers in Microbiology	2024	15:1375300
[122]	Wang Q, Shi J, Wang J, Pan J, Ma F, Zhang R, Tian D, Liu N, Zhou R, Gao Z, Liu M, Shi R, Niu S	Threshold response of arbuscular mycorrhizal mycelial respiration to a nitrogen addition gradient in an alpine grassland	Functional Ecology	2024	00:1-12
[123]	Zong N, Song M, Shi P, Jiang J, Zhang X, Shen Z	Timing patterns of nitrogen application alter plant production and CO2 efflux in an alpine meadow on the Tibetan Plateau, China	Pedobiologia - Journal of Soil Ecology	2014	57:263-269
[124]	Wen C, Shan Y, Xing T, Liu L, Yin G, Ye R, Liu X, Chang H, Yi F, Liu S, Zhang P, Huang J, Baoyin T	Effects of nitrogen and water addition on ecosystem carbon fluxes in a heavily degraded desert steppe	Global Ecology and Conservation	2024	52:e02981
[125]	Fu Y, Yu Y, Yang S, Yang G, Huang H, Yang Y, Du M	Effects of fertilization on soil physicochemical properties and enzyme activities of Zanthoxylum planispinum var. Dingtanensis plantation	Forests	2025	22:58:00
[126]	Chen Y, Zhang Y, Zhang X, Stevens C, Fu S, Feng T, Li X, Chen Q, Liu S, Hu S	Canopy and understory nitrogen additions differently affect soil microbial residual carbon in a temperate forest	Global Change Biology	2023	30:e17427
[127]	Li J, Liu S, Zhao X, Wang Q	Responses of soil organic carbon decomposition and temperature sensitivity to N and P fertilization in different soil aggregates in a subtropical forest	Forest	2023	14:72
[128]	Roy F, Ibayev O, Arnstadt T, Bassler C, Borken W, Groß C, Hoppe B, Hossen S, Kahl T, Moll J, Noll M, Purahong W, Schreiber J, Weisser WW, Hofrichter M, Kellner H	Nitrogen addition increases mass loss of gymnosperm but not of angiosperm deadwood without changing microbial communities	Science of the Total Environment	2023	900:165868
[129]	Wang Z, Zhang X, Wang M, Li L, Hu A, Chen X, Chang S, Hou F	Grazing weakens N-addition effects on soil greenhouse gas emissions in a semi-arid grassland	Agricultural and Forest Meteorology	2023	333:109423
[130]	He Y, Xing Y, Yan G, Liu G, Liu T, Wang Q	Long-term nitrogen addition could modify degradation of soil organic matter through changes in soil enzymatic activity in a natural secondary forest	Forest	2023	14:2049
[131]	Xu R, Wang Z, Zhu J	Effects of climate change and nitrogen addition on carbon loss in apline wetland of Qinghai-Tibet Plateau	Atmosphere	2023	14:1342
[132]	Xie M, Chen M, Wu W, Sun H	Effect of fertilization and environmental factors on soil respiration in tropical rubber plantation in Hainan	Ecology and Environmental Sciences	2014	23(3):430-438
[133]	Gao S, Wang C, Wang P, Shang S, Qiu J, Li J	Effects of multi-form and multi-level nitrogen addition on root respiration and microbial respiration in temperate forest soil	Environmental Chemistry	2020	39(6):1568-1577
[134]	Tang Z, Yin H, Zhou X, Wei Y, Liu Q	Short-trem effects of night warming and nitrogen addition on soil respiration of subalpine coniferous, western Sichuan, China	Chinese Journal of Applied Ecology	2012	18(5):713-721
[135]	Zhang Y, Hong M	Response of soil respiration to experimental warming and nitrogen addition in Inner Mongolia desert steppe	Acta Agrestia Sinica	2014	22(6):1227-1231
[136]	Wang Y, Liu J, He L, Dou J, Zhao H	Response of carbon dynamics to nitrogen deposition in typical freshwater wetland of Sanjiang Plain	Journal of Chemistry	2014	1-9
[137]	Shan J, Morris LA, Hendrick RL	The effects of management on soil and plant carbon sequestration in slash pine plantations	Journal of Applied Ecology	2001	38:932-941
[138]	Li W, Bai E, Li S, Sun J, Peng B, Jiang P	Effects of nitrogen addition and precipitation change on soil methane and carbon dioxide fluxes	Chinese Journal of Ecology	2013	32(8):1947-1958
[139]	Shao R, Zhao M, Zhao F, Shen R, Liu L, Zhang L, Xu M	Effects of fertilization on soil respiration, heterotrophic respiration, and temperature sensitivity in an oil tea plantation	Acta Ecologica Sinica	2018	38(7):1-8
[140]	Liu J, Zhou G, Zhang D, Xu Z, Duan H, Deng Q,Zhao L	Carbon dynamics in subtropical forest soil: effects of atmospheric carbon dioxide enrichment and nitrogen addition	Journal of Soils and Sediments	2010	10:730-738
[141]	Han Y, Zhang Z, Wang C, Jiang F, Xia J	Effects of mowing and nitrogen addition on soil respiration in three pathes in an oldfeild grassland in Inner Mongolia	Journal of Plant Ecology	2012	5(2):219-228
[142]	Giardina CP, Binkley D, Ryan MG, Fownes JH, Senock RS	Belowground carbon cycling in a humid tropical forest decreases with fertilization	Oecologia	2004	139:545-550
[143]	Jia S, Wang Z, Mei L, Sun Y, Quan X, Shi J, Yu S, Sun H, Gu J	Effect of nitrogen fertilization on soil respiration in Larix gmelinii and Fraxinus mandshurica plantations in China	Journal of Plant Ecology	2007	31(3):372-379
[144]	Wang Z, Zhao M, Han G, Gao F, Han X	Response of soil respiration to simulated warming and N addition in the desert steppe	Journal of Arid Land Resources and Environment	2012	26(9):98-103
[145]	Liu Y, Zhao C, Guo J, Zhang L, Xuan J, Chen A, You C	Short-term phosphorus addition augments the effects of nitrogen addition on soil respiration in a typical steppe	Science of the Total Environment	2021	761:143211
[146]	Deng Q, Zhou G, Liu J, Duan H, Zhang D	Responses of soil respiration to elevated carbon dioxide and nitrogen addition in young subtropical forest ecosystems in China	Biogeosciences	2010	7:315-328
[147]	Li Y, Sun J, Tian D, Wang J, Ha D, Qu Y, Jing G, Niu S	Soil acid cations induced reduction in soil respiration under nitrogen enrichment and soil acidification	Science of the Total Environment	2018	615:1535-1546
[148]	Fang C, Ye J, Gong Y, Pei J, Yuan Z, Xie C, Zhu Y, Yu Y	Seasonal responses of soil respiration to warming and nitrogen addition in a semi-arid alfalfa-pasture of the Loess Plateau, China	Science of the Total Environment	2017	590-591:729-738
[149]	Li J, Huang Y, Xu F, Wu L, Chen D, Bai Y	Responses of growing-season soil respiration to water and nitrogen addition as affected by grazing intensity	Functional Ecology	2018	32:1890-1901
[150]	Quan Q, Zhang Z, He N, Su H, Wen X, Sun X	Short-term effect of nitrogen addition on soil respiration of three temperate forests in Dongling Mountain	Chinese Journal of Ecology	2015	34(3):797-804
[151]	Du Y, Han H, Wang Y, Zhong M, Hui D, Niu S, Wan S	Plant functional groups regulate soil respiration responses to nitrogen addition and mowing over a decade	Functional Ecology	2017	32:1117-1127
[152]	Fang C, Li F, Pei J, Ren J, Gong Y, Yuan Z, Ke W, Zheng Y, Bai X, Ye J	Impacts of warming and nitrogen addition on soil autotrophic and heterotrophic respiration in a semi-arid environment	Agricultural and Forest Meteorology	2018	248:449-457
[153]	Zheng S, Bian H, Quan Q, Xu L, Chen Z, He N	Effect of nitrogen and acid deposition on soil respiration in a temperate forest in China	Geoderma	2018	329:82-90
[154]	He Y, Qi Y, Deng Q, Dong Y, Guo S, Yan Z	Carbon availability affects soil respiration response to drying-rewetting cycles in semiarid grasslands of China under nitrogen deposition	European Journal of Soil Biology	2019	93:103089
[155]	Peng Y, Chen F, Chen G, Liang Z, Tu L	Effects of simulated nitrogen deposition on soil respiration in a secondary evergreen broad-leaved forest on Wawushan Mountain	Chinese Journal of Applied Ecology Biology	2015	21(4):733-739
[156]	Zhang J, Li Q, Lv J, Peng C, Gu Z, Qi L, Song X, Song X	Management scheme influence and nitrogen addition effects on soil CO2, CH4, and N2O fluxes in a Moso bamboo plantation	Forest Ecosystems	2021	08:06:00
[157]	Sun L, Li L, Chen Z, Wang J, Xiong Z	Combined effects of nitrogen deposition and biochar application on emissions of N2O, CO2 and NH3 from agricultural and forest soils	Soil Science and Plant Nutrition	2014	60:254-265
[158]	Zhou J, Chen Z, Yang Q, Lai S, Wang Z, Xu B	Response of soil respiraiton and its components to nitrogen and phosphorus addition in farming-withdrawn grassland in the semiarid loess hilly-gully region	Environmental Science	2020	41(1):479-488
[159]	Fu R, Yu J, Zhang Y, Yu Y, Tao X	Dynamics of soil respiration and its influencing factors in urban forests under nitrogen addition	Chinese Journal of Applied Ecology	2020	31(3):744-752
[160]	Jiang X, Cao L, Zhang R	Changes of labile and recalcitrant carbon pools under nitrogen addition in a city lawn soil	Journal of Soils and Sediments	2014	14:515-524
[161]	Gao Q, Hasselquist NJ, Palmroth S, Zeng Z, You W	Short-term response of soil respiration to nitrogen fertilization in a subtropical evergreen forest	Soil Biology & Biochemistry	2014	76:297-300
[162]	Zhu M, Zhang Z, Yu J, Wu L, Han G, Yang L, Xing Q, Xie B, Mao P, Wang G	Effect of nitrogen deposition on soil respiration in Phragmites australis wetland in the Yellow River Delta, China	Chinese Journal of Plant Ecology	2013	37(6):517-529
[163]	Mo J, Zhang W, Zhu W, Fang Y, Li D, Zhao P	Response of soil respiration to simulated N deposition in a disturbed and a rehabilitated tropical forest in southern China	Plant Soil	2007	296:125-135
[164]	Gao Q, Bai E, Wang J, Zheng Z, Xia J, You W	Effects of litter manipulation on soil respiration under short-term nitrogen addition in a subtropical evergreen forest	Forest Ecology and Management	2018	429:77-83
[165]	Xiao S,Wang GG,Tang C, Fang H, Duan J, Yu X	Effects of one-year simulated nitrogen and acid deposition on soil respiration in a subtropical plantation in china	Forests	2020	11:235
[166]	Zhou J, Liu X, Xie J, Lyu M, Zheng Y, You Z, Fan Y, Lin C, Chen G, Chen Y, Yang Y	Nitrogen addition affects soil respiration primarily through changes in microbial community structure and biomass in a subtropical natural forest	Forest	2019	10:435
[167]	Chen J, Kang F, Cheng X, Zhu J, Bai Y, Han H	Short-term response of soil respiration to simulated nitrogen and sulfur deposition in Larix principis-rupprechtii plantation in Taiyue Mountain, China	Chinese Journal of Applied Environment Biology	2016	22(4):0646-0653
[168]	Peng Y, Li F, Zhou G, Fang K, Zhang D, Li C, Yang G, Yang G, Wang J, Mohammat A, Yang Y	Nonlinear response of soil respiration to increasing nitrogen additions in a Tibetan alpine steppe	Environmental Research Letters	2017	12:024018
[169]	Mo J, Zhang W, Zhu W, Gundersen P, Fang Y, Li D, Wang H	Nitrogen addition reduces soil respiration in a mature tropical forest in southern China.	Global Change Biology	2008	14:403-412
[170]	Fang H, Cheng S, Yu G, Zheng J, Zhang P, Xu M, Li Y, Yang X	Responses of CO2 efflux from an alpine meadow soil on the Qinghai Tibetan Plateau to multi-form and low-level N addition	Plant Soil	2012	351:177-190
[171]	Xiang Y, Huang C, Hu T, Tu L, Yang W, Li R, Hu C	Response of soil respiration to simulated nitrogen deposition in an Eucalyptus grandis plantation in the rainy area of western China	Science Silive Science	2014	1(1):21-26
[172]	Zeng Q, He B, Li Y, Xie L, Yang L, Deng X, Li C	Seasonal effect of simulated nitrogen deposition on soil respiration and soil enzyme activity in masson pine forest in Mt. Jinyun, Chongqing, China	Environmental Science	2016	37(10):3971-3978
[173]	Zhang X, Yan W, Zheng W, Zhao L	Effects of nitrogen deposition on soil respiration of Pinus ellipttii	Chinese Agricultural Science Bulletin	2012	28(22):5-10
[174]	Zhao B, Wang J, Cao J, Zhao X, Gadow K	Inconsistent autotrophic respiration but consistent heterotrophic respiration responses to 5-years nitrogen in northern China addition under natural and planted Pinus tabulaeformis forests	Plant Soil	2018	429:375-389
[175]	Zhou Z, Zhang R, Gao S, Zhang X, Fu X, Tang M, Wu G	Effects of simulated nitrogen deposition on temperature sensitivity of soil respiration components in Populus L. plantations in a riparian zone of the Yangtze River	Acta Ecologica Sinica	2015	35(21):6947-6956
[176]	Hui D, Yu C, Deng Q, Saini P, Collins K, de Koff J	Weak effects of biochar and nitrogen fertilization on switchgrass photosynthesis, biomass, and soil respiration	Agriculture	2018	8:143
[177]	Liu Y, Chen Q, Wang Z, Zheng H, Chen Y, Chen X, Wang L, Li H, Zhang J	Nitrogen addition alleviates microbial nitrogen limitations and promotes soil respiration in a subapline coniferous forest	Forests	2019	10:1038
[178]	Zhou S, Xiang Y, Tie L, Han B, Huang C	Simulated nitrogen deposition significantly reduces soil respiration in an evergreen broadleaf forest in western China	Plos One	2018	13(9):e0204661
[179]	Zhang Q, Li J, Xie Z	Effects of nitrogen addition on soil respiration of Rhododendron simsii shrubland in the subtropical mountainous areas of China	Chinese Journal of Plant Ecology	2017	41(1):95-104
[180]	Zhang X, Yan W, Ma X, Zheng W, Wang G, Liang X	Short-term effects of nitrogen deposition on soil respiration of Cinnamomum camphora plantation	Journal of Central South University of Forestry & Technology	2012	32(3):109-113
[181]	Song X, Hu T, Xian J, Xiao C, Liu W	Soil respiration and its response to simulated nitrogen deposition in evergreen broad-leaved forest, Southwest Sichuan	Journal of Soils and Water Conservation	2007	21(4):168-172
[182]	Tu L, Hu T, Huang L, Li R, Dai H, Luo S, Xiang Y	Response of soil respiration to simulated nitrogen deposition in Pleioblastus Amarus forest, rainy area of west China	Chinese Journal of Plant Ecology	2009	33(4):728-738
[183]	Luo S, Hu T, Zhang J, Dai H, Tu L, Li R, Huang L	Responses of soil respiration to nitrogen fertilization in betulah luminifera forest, Rainy Area of West China	Journal of Agro-Environment Science	2010	29(9):1834-1839
[184]	Zhang X, Li Y, Ning C, Zheng W, Zhao D, Li Z, Yan W	Litter management as a key factor relieves soil respiration decay in an Urban-Adjacent Camphor	Forests	2020	11:216
[185]	Yang X, Duan P, Hicks L, Wang K, Li D	Mechanisms underlying the responses of microbial carbon and nitrogen use efficiencies to nitrogen addition are mediated by topography in a subtropical forest	Science of the Total Environment	2023	880:163236
[186]	Qu W, Xie B, Hua H, Bohrer G, Penuelas J, Wu C, Han G	Long-term nitrogen enrichment accelerates soil respiration by boosting microbial biomass in coastal wetlands	Soil Biology and Biochemistry	2022	175:108864
[187]	Li Z, Peng Q, Dong Y, He Y, Yan Z, Guo Y, Qin S, Qi Y	Response of soil respiration to water and nitrogen addition and its influencing factors: a four-year field experiment in a temperate steppe	Plant Soil	2022	471:427-442
[188]	Bowden RD, Rice AM, Wang J, Wurzbacher SJ, Coble AE, Simpson M, Washko S, Baldauf N, Lajtha K, Wind L, Johnson B	Long-term nitrogen addition decreases organic matter decomposition and increase forest soil carbon	Soil Science Society of America Journal	2019	83:S82-S95
[189]	Cusack D, Torn M, Mcdowell WH, Silver WL	The response of heterotrophic activity and carbon cycling to nitrogen additions and warming in two tropical soils	Global Change Biology	2010	16:2555-2572
[190]	Eastman BA, Adams MB, Brzostek ER, Burnham MB, Carrara JE, Kelly C, McNeil BE, Walter CA, Peterjohn WT	Altered plant carbon partitioning enhanced forest ecosystem carbon storage after 25 years of nitrogen additions	New Phytologist	2021	230:1435-1448
[191]	Frey B, Carnol M, Dharmarajah A, Brunner I, Schleppi P	Only minor changes in the soil microbiome of a sub-alpine forest after 20 years of moderately increased nitrogen loads	Frontiers in Forests and Global Change	2020	3:77
[192]	Högberg MN, Blaško R, Holm Bach L, Hasselquist NJ, Egnell G, Näsholm T, Högberg P	The return of an experimentally N-saturated boreal forest to an N-limited state: observations on the soil microbial community structure, biotic N retention capacity and gross Nmineralisation	Plant Soil	2014	381:45-60
[193]	Kazanski CE, Riggs CE, Reich PB, Hobbie SE	Long-term nitrogen addition does not increase soil carbon storage or cycling across eight temperate forest and grassland sites on a sandy outwash plain	Ecosystems	2019	22:1592-1605
[194]	Kwak JH, Naeth MA, Chang SX	Microbial activities and gross nitrogen transformation unaffected by ten-year nitrogen and sulfer addition	Soil Biology & Biochemistry	2018	82:362-370
[195]	Oulehle F, Tahovska K, Chuman T, Evans CD, Hruska J, Ruzek M, Barta J	Comparison of the impacts of acid and nitrogen additions on carbon fluxes in European conifer and broadleaf forests	Environmental Pollution	2018	238:884-893
[196]	Riggs CE, Hobbie SE, Bach EM, Hofmockel KS, Kazanski CE	Nitrogen addition changes grassland soil organic matter decomposition	Biogeochemistry	2015	125:203-219
[197]	Schleuss PM, Widdig M, Heintz-Buschart A, Guhr A, Martin S, Kirkman K, Spohn M	Stoichiometric controls of soil carbon and nitrogen cycling after long-term nitrogen and phosphorus addition in a mesic grassland in South Africa	Soil Biology and Biochemistry	2019	135:294-303
[198]	Thirukkumaran CM, Parkinson D	Microbial activity, nutrient dynamics and litter decomposition in a Canadian Rocky Mountain pine forest as affected by N and P fertilizers	Forest Ecology and Management	2002	159:187-201
[199]	Waldrop MP, Zak DR, Sinsabaugh RL	Microbial community response to nitrogen deposition in northern forest ecosystems	Soil Biology & Biochemistry	2004	36:1443-1451
[200]	West JB, Hobbie S, Reich PB	Effects of plant species diversity, atmospheric [CO2], and N addition on gross rates of inorganic N release from soil organic matter	Global Change Biology	2006	12:1400-1408
[201]	Cai C, Yang Z, Liu L, Lai Y, Lei J, Fan S, Tang X	Consistent effects of canopy vs. understory nitrogen addition on soil respiration and net ecosystem production in moso bamboo forests	Forests	2021	12:1427
[202]	Chen X, Liu J, Deng Q, Yan J, Zhang D	Effects of elevated CO2 and nitrogen addition on soil organic carbon fractions in a subtropical forest	Plant Soil	2012	357:25-34
[203]	Deng Q, Cheng X, Zhou G, Liu J, Liu S, Zhang Q, Zhang D	Seasonal responses of soil respiration to elevated CO2 and N addition in young subtropical forest ecosystems in southern China	Ecological Engineering	2013	61:65-73
[204]	Dong Q, Zhang X, Wang H, Fu X, Guo Z, Chen F	Effects of nitrogen additions on the temperature sensitivities of soil organic carbon mineralization rates and enzyme kinetic parameters in Chinese fir plantations	Acta Ecologica Sinica	2018	38(18):1-9
[205]	Diao H, Chen X, Wang G, Ning Q, Hu S, Sun W, Dong K, Wang C	The response of soil respiration to different N compounds addition in a saline–alkaline grassland of northern China	Journal of Plant Ecology	2022	15:897-910
[206]	He T, Wang Q, Wang S, Zhang F	Nitrogen addition altered the effect of belowground Callocation on soil respiration in a subtropical forest	Plos One	2016	11(5):e0155881
[207]	Hu Y, Zeng D, Liu Y, Zhang Y, Chen Z, Wang Z	Responses of soil chemical and biological properties to nitrogen addition in a Dahurian larch plantation in Northeast China	Plant Soil	2010	333:81-92
[208]	Li J, Sang C, Yang J, Qu L, Xia Z, Sun H, Jiang P, Wang X, He H, Wang C	Stoichiometric imbalance and microbial community regulate microbial elements use efficiencies under nitrogen addition	Soil Biology and Biochemistry	2021	156:108207
[209]	Liang L, Chen F, Han H, Zhang Y, Zhu J, Niu S	Pathways regulating decreased soil respiration with nitrogen addition in a subtropical forest in China	Water Air Soil Plant	2019	230:91
[210]	Liu L, Zhang T, Gilliam FS, Gundersen P, Zhang W, Chen H, Mo J	Interactive effects of nitrogen and phosphorus on soil microbial communities in a tropical forest	Plos One	2013	8(4):e61188
[211]	Lu X, Mao Q, Wang Z, Mori T, Mo J, Su F, Pang Z	Long-term nitrogen addition decreases soil carbon mineralization in an N-rich primary tropical forest	Forests	2021	12:734
[212]	Luo Y, Wang C, Shen Y, Sun W, Dong K	The interactive effects of mowing and N addition did not weaken soil net N mineralization rates in semi-arid grassland of Northern China	Scientific Reports	2019	9:13457
[213]	Ma L, Zhou Z, Wang Z	Effects of mowing and nitrogen addition on carbon sequestration of Leymus chinensis grasslands in the Songnen Plain, Northeast China	Chinese Journal of Ecology	2016	35(1):87-94
[214]	Mo J, Fang Y, Xu G, Li D, Xue J	The short-term responses of soil CO2 emission and CH4 uptake to simulated N deposition in nursery and forests of Dinghushan in subtropical China	Acta Ecologica Sinica	2005	25(4):682-690
[215]	Peng Q, Dong Y, Qi Y, Xiao S, He Y, Ma T	Effects of nitrogen fertilization on soil respiration in temperate grassland in Inner Mongolia, China	Environmental Earth Science	2011	62:1163-1171
[216]	Song L, Tian P, Zhang J, Jin G	Effects of three years of simulated nitrogen deposition on soil nitrogen dynamics and greenhouse gas emissions in a Korean pine plantation of northeast China	Science of the Total Environment	2017	609:1303-1311
[217]	Song L, Zhang J, Jin G	Different responses of soil CO2 and N2O emissions to simulated N deposition in forests with divergent N transformation characteristics	Soil Use and Management	2020	37:63-71
[218]	Tu L, Hu T, Zhang J, Li R, Dai H, Luo S	Short-term simulated nitrogen deposition increases carbon sequestration in a Pleioblastus amarus plantation	Plant Soil	2011	340:383-396
[219]	Wang C, Butterbach-Bahl K, He N, Wang Q, Xing X, Han X	Nitrogen addition and mowing affect microbial nitrogen transformations in a C4 grassland in northern China	European Journal of Soil Biology	2015	66:485-495
[220]	Wang C, Yang X, Xu K	Effect of chronic nitrogen fertilization on soil CO2 flux in a temperate forest in North China: a 5-year nitrogen addition experiment	Journal of Soil and Sediments	2017	18:506-516
[221]	Wang J, Li Q, Fu X, Dai X, Kou L, Xu M, Chen S, Chen F, Wang H	Mechanisms driving ecosystem carbon sequestration in a Chinese fir plantation: nitrogen versus phosphorus fertilization	European Journal of Soil Biology	2019	138:863-873
[222]	Wang Y, Cheng S, Fang H, Yu G, Xu X, Xu M, Wang L, Li X, Si G, Geng J, He S	Contrasting effects of ammonium and nitrate inputs on soil CO2 emission in a subtropical coniferous plantation of southern China	Biology and Fertility of Soils	2015	51:815-825
[223]	Wang Y, Liu S, Luan J, Chen C, Cai C, Zhou F, Di Y, Gao X	Nitrogen addition exacerbates the negative effect of throughfall reduction on soil respiration in a Bamboo forest	Forests	2021	12:724
[224]	Yang F, Zhang Z, Barberan A, Yang Y, Hu S, Guo H	Nitrogen-induced acidification plays a vital role driving ecosystem functions: Insights from a 6-year nitrogen enrichment experiment in a Tibetan alpine meadow	Soil Biology and Biochemistry	2021	153:108107
[225]	Yang K, Zhu J, Gu J, Xu S, Yu L, Wang Z	Effects of continuous nitrogen addition on microbial properties and soil organic matter in a Larix gmelinii plantation in China	Journal of Forestry Research	2017	29:85-92
[226]	Zhang D, Peng Y, Li F, Yang G, Wang J, Yu J, Zhou G, Yang Y	Changes in above-/below-ground biodiversity and plant functional composition mediate soil respiration response to nitrogen input	Functional Ecology	2020	35:1171-1182
